1 **A bacterial effector counteracts host autophagy by promoting degradation of an**  
2 **autophagy component**

3  
4 Jia Xuan Leong<sup>1</sup>, Margot Raffener<sup>2</sup>, Daniela Spinti<sup>2</sup>, Gautier Langin<sup>1</sup>, Mirita Franz-Wachtel<sup>3</sup>,  
5 Andrew R. Guzman<sup>4</sup>, Jung-Gun Kim<sup>4</sup>, Pooja Pandey<sup>5</sup>, Alyona E. Minina<sup>6</sup>, Boris Macek<sup>3</sup>,  
6 Anders Hafrén<sup>8</sup>, Tolga O. Bozkurt<sup>5</sup>, Mary Beth Mudgett<sup>4</sup>, Frederik Börnke<sup>2,7</sup>, Daniel Hofius<sup>8</sup>,  
7 Suayib Üstün<sup>1\*</sup>

8  
9 <sup>1</sup>University of Tübingen, Center for Plant Molecular Biology (ZMBP), 72076 Tübingen,  
10 Germany

11 <sup>2</sup>Leibniz-Institute of Vegetable and Ornamental Crops (IGZ), 14979 Großbeeren, Germany

12 <sup>3</sup>Interfaculty Institute for Cell Biology, Department of Quantitative Proteomics, University of  
13 Tübingen, 72076 Tübingen, Germany.

14 <sup>4</sup>Department of Biology, Stanford University, Stanford, CA 94305, USA

15 <sup>5</sup>Department of Life Sciences, Imperial College London, SW7 2AZ London, United Kingdom.

16 <sup>6</sup>Department of Molecular Sciences, Uppsala BioCenter, Swedish University of Agricultural  
17 Sciences and Linnean Center for Plant Biology, 75007 Uppsala, Sweden.

18 <sup>7</sup>Institute of Biochemistry and Biology, University of Potsdam, 14476 Potsdam, Germany

19 <sup>8</sup>Department of Plant Biology, Uppsala BioCenter, Swedish University of Agricultural Sciences  
20 and Linnean Center for Plant Biology, 75007 Uppsala, Sweden.

21  
22 **Keywords:** Autophagy, Effectors, Immunity, Ubiquitination, Disease, Xenophagy

23  
24 \*Corresponding author

25 suayib.uestuen@zmbp.uni-tuebingen.de

26

27 **Abstract:**

28 Beyond its role in cellular homeostasis, autophagy plays anti- and pro-microbial roles in host-  
29 microbe interactions, both in animals and plants. One prominent role of anti-microbial  
30 autophagy is to degrade intracellular pathogens or microbial molecules, in a process termed  
31 xenophagy. Consequently, microbes evolved mechanisms to hijack or modulate autophagy to  
32 escape elimination. Although well-described in animals, the extent to which xenophagy  
33 contributes to plant-bacteria interactions remains unknown. Here, we provide evidence that  
34 *Xanthomonas campestris* pv. *vesicatoria* (*Xcv*) suppresses host autophagy by utilizing type-III  
35 effector XopL. XopL interacts with and degrades the autophagy component SH3P2 via its E3  
36 ligase activity to promote infection. Intriguingly, XopL is targeted for degradation by defense-  
37 related selective autophagy mediated by NBR1/Joka2, revealing a complex antagonistic  
38 interplay between XopL and the host autophagy machinery. Our results implicate plant  
39 antimicrobial autophagy in depletion of a bacterial virulence factor and unravels an  
40 unprecedented pathogen strategy to counteract defense-related autophagy.

41

42 **Introduction**

43 Eukaryotic cells react dynamically to external and internal stimuli by adjusting their proteome.  
44 This requires a stringent regulation of protein homeostasis which is achieved in large part by  
45 regulated protein degradation. Cellular degradation machineries including the proteasome and  
46 autophagy maintain protein homeostasis by recycling unwanted or dysfunctional proteins (Pohl  
47 & Dikic, 2019). While the proteasome degrades short-lived proteins or mis-folded proteins,  
48 autophagy can remove larger protein complexes, insoluble aggregates, entire organelles as well  
49 as pathogens. Under normal conditions, both degradation pathways are critical for cellular  
50 housekeeping functions, while under stress conditions they facilitate the reorganization of the  
51 proteome to adapt to a changing environment (Marshall & Vierstra, 2018).

52 Regulated proteolytic degradation by proteasome has been identified as an essential component  
53 of immunity influencing the outcome of host-microbe interactions across kingdoms (Adams &  
54 Spoel, 2018; Hu & Sun, 2016). In the recent years, autophagy has also emerged as a central  
55 player in immunity and disease in humans and plants (Germic *et al*, 2019; Leary *et al*, 2019;  
56 Levine *et al*, 2011; Üstün *et al*, 2017; Yang & Klionsky, 2020). In mammals, autophagy has  
57 various connections to several diseases, regulating cell death and innate immunity (Germic *et al*,  
58 2019; Yang & Klionsky, 2020). Dual roles have also been ascribed to autophagy in host-  
59 bacteria interactions (Mostowy, 2013). While some bacterial pathogens recruit the autophagy  
60 machinery in order to create a replicative niche (pro-bacterial autophagy), anti-bacterial  
61 autophagy removes bacterial intruders to limit pathogen infection (Huang & Brumell, 2014).  
62 The elimination of bacteria is a selective autophagy response, termed xenophagy (Gomes &  
63 Dikic, 2014). In this process, bacterial pathogens such as *Salmonella* and *Shigella* are degraded  
64 by autophagy through a ubiquitin-dependent mechanism (Dupont *et al*, 2009; van Wijk *et al*,  
65 2012). This demonstrates that autophagy is not only a largely unspecific (“bulk”) catabolic and  
66 recycling process, as increasing evidence now indicates that autophagy also acts as a selective  
67 mechanism to degrade protein aggregates, organelles and pathogens. Selectivity is mediated by  
68 autophagy receptors, of which p62 and NBR1 play key roles in controlling pathogenic infection  
69 in mammals (Gomes & Dikic, 2014). Both autophagy receptors can bind to ubiquitinated  
70 bacteria, and degrade them, through their ability to bind autophagosome-associated ATG8  
71 proteins (Gomes & Dikic, 2014).

72 It is known that type-III effector (T3E) proteins of plant pathogenic bacteria are present in the  
73 host cell while bacteria reside in the extracellular space. These effectors are able to manipulate  
74 host defense responses for the benefit of the pathogen (Khan *et al*, 2018). Very recently, it has  
75 been shown that microbial effectors perturb or hijack degradation machineries to attenuate plant  
76 immune reactions (Banfield, 2015; Langin *et al*, 2020). For instance, *Pst* activates autophagy  
77 via the action of the T3E HopM1 to degrade the proteasome and suppress its function in a

78 process termed proteaphagy (Üstün *et al*, 2018; Üstün *et al*, 2016). Although this process can  
79 be categorized as a pro-bacterial role of autophagy, NBR1-mediated anti-bacterial autophagy  
80 seems to restrict lesion formation and pathogenicity of *Pst* (Üstün & Hofius, 2018). The dual  
81 role of autophagy in plant-bacteria interactions is further confirmed by findings that certain  
82 effectors are also able to suppress autophagy responses, although the understanding of the exact  
83 molecular mechanisms are still very limited (Lal *et al*, 2020). In addition, plant NBR1, which  
84 is also referred as Joka2 in solanaceous species, is able to restrict growth and disease  
85 progression of the plant pathogenic oomycete *Phytophthora infestans* (Dagdás *et al*, 2016;  
86 Dagdas *et al*, 2018). Recently, plant NBR1-mediated xenophagy was described to remove  
87 intracellular viral proteins (Hafrén *et al*, 2017; Hafrén *et al*, 2018). These studies demonstrated  
88 that, similar to that in mammals, plant NBR1 participates in xenophagy by degrading viral  
89 proteins. Given the fact that plant pathogenic bacteria reside in the extracellular space and the  
90 presence of T3Es inside the host cell it is not known whether NBR1-mediated xenophagy might  
91 play a role in plant-microbe interactions by targeting intracellular T3Es.

92 Like *Pst*, *Xanthomonas campestris* pv. *vesicatoria* (*Xcv*) is another well-studied hemi-  
93 biotrophic bacterium, causing disease on tomato and pepper plants (Timilsina *et al*, 2020).  
94 Mounting evidence has been established that *Xcv* and its T3Es exploit plant ubiquitin- and  
95 ubiquitin-like pathways (Buttner, 2016; Üstün & Börnke, 2014). While the role of the  
96 proteasome system in *Xanthomonas* infections is well understood, little is known about how  
97 autophagy shapes the outcome of *Xanthomonas*-host interactions. Recent findings in the  
98 cassava- *Xanthomonas axonopodis* pv. *manihotis* (*Xam*) model suggest that autophagy has an  
99 anti-bacterial role (Yan *et al*, 2017; Zeng *et al*, 2018). However, our current understanding about  
100 how T3Es might modulate and regulate this response is very limited. Are there similar  
101 mechanisms operating in pro- and antibacterial roles across different pathogenic bacteria? Do  
102 plants utilize xenophagy as an anti-bacterial mechanism to degrade pathogenic components in  
103 plant-bacteria interactions?

104 To address these questions, we performed a mechanistic analysis of the interplay of plant  
105 defence-related autophagy and *Xcv* pathogenesis. Here, we provide evidence that NBR1/Joka2  
106 degrades T3E XopL, which in turn is used by *Xcv* to block autophagy via its E3 ligase activity  
107 by degrading autophagy component SH3P2 in a proteasome-dependent manner. This prevents  
108 T3E XopL from being targeted for degradation by the selective autophagy receptor  
109 NBR1/Joka2. We show that specificity in autophagy pathways play a role during plant-  
110 pathogen interactions.

111

## 112 **Results**

113

### 114 ***Xanthomonas blocks autophagy in an effector-dependent manner to promote pathogenicity***

115 Given the prominent role of autophagy in host-microbe interactions, we investigated autophagic  
116 response after *Xanthomonas* infection. To this end we used the model plant *Nicotiana*  
117 *benthamiana*, since methods such as Agrobacterium-mediated transient expression, virus-  
118 induced gene silencing (VIGS), and autophagy activity reporter assays are well-established and  
119 reproducible. Assays were conducted with a *Xcv* strain harboring a deletion in the T3E XopQ  
120 (*Xcv*  $\Delta$ xopQ), which is a host range determinant in *Nicotiana* species (Adlung *et al*, 2016), thus  
121 restoring the full virulence of *Xcv* in *Nicotiana benthamiana* in the absence of XopQ.

122 First, we monitored autophagosome formation using RFP-ATG8g which is a structural  
123 component of autophagosomes and is widely used to label these structures (19). We infected  
124 *N. benthamiana* plants transiently expressing RFP-ATG8g with *Xcv*  $\Delta$ xopQ and monitored  
125 autophagosomal structures during Concanamycin A (ConA) treatment. ConA is an inhibitor of  
126 vacuolar acidification that blocks autophagic body degradation (Minina *et al*, 2018; Svenning  
127 *et al*, 2011). In the absence of ConA, *Xcv*  $\Delta$ xopQ induced massive accumulation of  
128 autophagosome-like structures which could not be further enhanced by the presence of ConA

129 (Fig. 1A). This suggests that *Xcv* blocks autophagic degradation *in planta*. To provide additional  
130 evidence that these structures are indeed autophagosomes, we imaged *N. benthamiana* plants  
131 which were silenced using VIGS for *ATG7*, a crucial component of the autophagy pathway, and  
132 transiently expressing GFP-ATG8e, and found that the structures that accumulated under *Xcv*  
133 infection after 6hpi or AZD8055 treatment, a compound known to induce autophagy, no longer  
134 accumulating (Fig. S1A). The induction of autophagosome formation and suppression of  
135 autophagic degradation prompted us to investigate host autophagy by immunoblotting for  
136 endogenous ATG8 and Joka2 in *N. benthamiana* (Dagdas *et al*, 2016; Svenning *et al*, 2011).  
137 We also used the previously described autophagy suppressor AIMp, a small peptide sequence  
138 derived from the *Phytophthora* PexRD54 effector (Pandey *et al*, 2021), as a positive control for  
139 autophagy suppression. Joka2 protein abundance increased during infection, to a small extent  
140 1-day post-inoculation (dpi), and to a greater extent at 2 dpi, while ATG8 protein levels only  
141 slightly increased at 2 dpi (Fig. 1B). Protein accumulation seen during immunoblotting could  
142 be attributed to increased transcription and/or decreased degradation. Thus, to uncouple these  
143 effects we utilized a quantitative autophagy assay to measure autophagic degradation during  
144 infection. This assay is based on Agrobacterium-mediated transient expression of 35S  
145 promoter-driven *Renilla* luciferase (RLUC) fused to ATG8a (RLUC-ATG8a) or NBR1  
146 (RLUC-NBR1), together with free *Firefly* luciferase (FLUC) which serves as an internal control  
147 for expression as it is not degraded with autophagy (Dauphinee *et al*, 2019; Üstün *et al.*, 2018).  
148 The autophagy reporter assay revealed that *Xcv*  $\Delta xopQ$  infection led to a significant increase of  
149 RLUC-ATG8a/FLUC and RLUC-NBR1/FLUC ratios, suggesting reduced autophagic turnover  
150 after 2dpi (Fig. 1C, Fig. S1B). Another indicator of impaired autophagy is the increased gene  
151 expression of the autophagic markers (Minina *et al*, 2018). Transcript levels of *Joka2*, *NbATG8-*  
152 *2.1/2* and *NbATG8-1.1/1.2* were significantly higher compared to mock infection at 2 dpi (Fig.  
153 1D), with *NbATG8-2.1/2.2* showing an earlier increase than the two other genes and suggesting  
154 at a differential response of NbATG8 isoforms during *Xcv* infection. Taken together with  
155 previous results, accumulation of Joka2 protein levels at 1 dpi which was observed earlier than  
156 its induced gene expression at 2 dpi, as well as reduced autophagic turnover after 6 hpi using  
157 the autophagy reporter assay (Fig. S1B) strongly suggest that *Xcv* dampens autophagic flux. To  
158 assess the biological relevance of suppressed autophagic degradation during *Xcv* infection, we  
159 determined bacterial growth in *N. benthamiana roq1* plants which carry a mutation in  
160 *Recognition of XopQ 1 (Roq1)* that recognizes the effector XopQ to activate resistance to *Xcv*  
161 (Gantner *et al*, 2019; Schultink *et al*, 2017). In these plants we transiently expressed RFP-AIMp  
162 as an autophagy suppressor. At 6 dpi, *Xcv* growth was significantly elevated in *roq1* plants  
163 transiently expressing RFP-AIMp compared to empty vector (EV) control (Fig. 1E). The same  
164 trend was observed when *ATG7* was silenced using VIGS in *N. benthamiana*, as *ATG7* silencing  
165 rendered plants more susceptible to *Xcv*  $\Delta xopQ$  at 6 dpi (Fig. S2).  
166 Because T3Es were previously shown to modulate proteasome function and autophagy (Üstün  
167 *et al*, 2018; Üstün *et al*, 2016; Üstün *et al*, 2013), we analyzed host autophagy response to a  
168 nonpathogenic type-III secretion system (T3SS) mutant *Xcv*  $\Delta hrcN$ , which is unable to drive  
169 secretion of T3Es (Lorenz & Buttner, 2009). In contrast to *Xcv*  $\Delta xopQ$ , the T3SS-deficient  
170 mutant *Xcv*  $\Delta hrcN$  did not alter the protein abundance of ATG8 and Joka2 (Fig. S3A), nor  
171 RLUC-ATG8a/FLUC or RLUC-NBR1/FLUC ratio (Fig. S3B) or transcript abundance of  
172 autophagy marker genes *NbJoka2* and *NbATG8-1.1/1.2* (Fig S3C). Together, these data support  
173 the model that *Xcv* blocks autophagy in a T3E-dependent manner to promote virulence.  
174

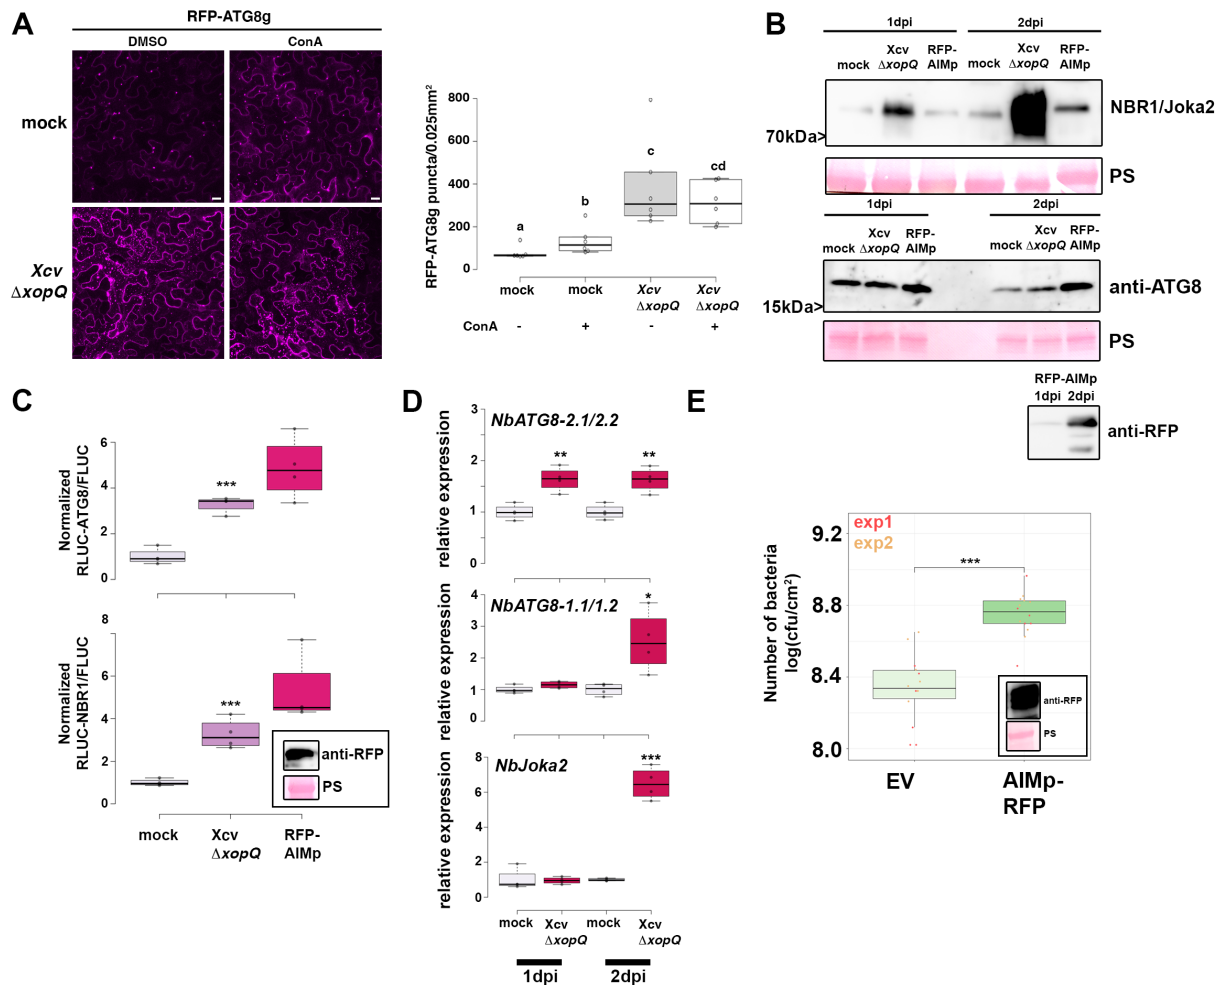

175  
176

### Figure 1: Xanthomonas blocks autophagy to enhance its pathogenicity

178 (A) RFP-ATG8g-labeled autophagosomes were quantified from plants infected with mock or  
179 *Xcv*  $\Delta xopQ$  at 2 dpi in the presence or absence of ConA (bars = 20  $\mu$ m). Puncta were calculated  
180 from z-stacks (15) of  $n=6$  individuals using ImageJ. Data points are plotted as open circles.  
181 Different letters indicate statistically different groups ( $P < 0.05$ ) as determined by one-way  
182 ANOVA. The experiment was repeated twice with similar results.

183 (B) Immunoblot analysis of NBR1 and ATG8 protein levels in *Xcv*  $\Delta xopQ$  or mock infected *N.*  
184 *benthamiana* plants at 1 and 2dpi. Agrobacterium-mediated transient expression of AIMp-RFP  
185 serves as a control for autophagy suppression. Ponceau Staining (PS) served as a loading  
186 control. The experiment was repeated three times with similar results.

187 (C) RLUC-ATG8a or RLUC-NBR1 constructs were coexpressed with internal control FLUC  
188 in *N. benthamiana*. *Xcv*  $\Delta xopQ$  was co-infiltrated with Agrobacteria containing the luciferase  
189 reporter constructs. Coexpression of RFP-AIMp serves as a control for autophagy inhibition.  
190 Expression of the latter was confirmed with western blot (inset). *Renilla* (RLUC) and *Firefly*  
191 (FLUC) luciferase activities were simultaneously measured in leaf extracts at 48 h post-  
192 infiltration using the dual-luciferase system ( $n=4$ ). Statistical significance ( $***P<0.001$ ) was  
193 revealed by Student's *t*-test. The experiment was repeated more than 3 times with similar  
194 results.

195 (D) RT-qPCR analysis of *NbATG8-1.1/1.2*, *NbATG8-2.1/2.2* and *NbJoka2* transcript levels  
196 upon challenge of *N. benthamiana* plants with *Xcv*  $\Delta xopQ$  for 1 and 2 dpi compared to mock  
197 infected plants. Values represent expression relative to mock control of respective time point

198 and were normalized to *Actin*. Statistical significance ( $*P < 0.05$ ,  $**P < 0.01$ ,  $***P < 0.001$ )  
199 was revealed by Student's *t*-test.

200 (E) Bacterial density in leaves of *N. benthamiana roq1* infected with *Xcv* in the presence or  
201 absence autophagy suppressor AIMp-RFP. Leaves were syringe-infiltrated with  $OD_{600} =$   
202 0.0004, and colony-forming units were counted at 6 dpi. Compared to empty vector control  
203 (EV), AIMp expressing plants (n=6) harbour significantly more bacteria. Bacterial growth was  
204 repeated with the same result in 12 plants over two independent experiments. Red and yellow  
205 data points indicate independent repeats of the experiment. Statistical significance ( $***P <$   
206 0.001) was revealed by Student's *t*-test. Expression of RFP-AIMp was verified at 6 dpi with an  
207 anti-RFP blot (inset).  
208

### 209 **T3E XopL suppresses autophagy**

210 To address which T3E(s) might manipulate autophagy, we screened for *Xcv* effectors XopJ,  
211 XopD and XopL which have known function in modulating proteolytic degradation pathways  
212 (Üstün & Börnke, 2014; Kim *et al*, 2013; Singer *et al*, 2013; Üstün *et al*, 2015; Üstün & Börnke,  
213 2015) as well as XopS which has not been described to modulate degradation machineries. To  
214 this end, we used the quantitative dual-luciferase autophagy reporter assay. Transient  
215 expression of XopL, a previously characterized E3 ligase (Singer *et al*, 2013), and XopJ, an  
216 effector previously shown to inhibit host proteasome, led to a significant increase in RLUC-  
217 ATG8a/FLUC and RLUC-NBR1/FLUC ratio (Fig. 2A, S4A), which was consistent across  
218 multiple experiments. In contrast, transient expression of XopD and XopS had no evident effect  
219 on autophagic degradation (Fig. S4A). We chose to study XopL further, as XopJ was previously  
220 shown to inhibit host proteasome (Üstün *et al*, 2013), which may result in modulation of  
221 autophagy as shown by the effect of treatment with a proteasome inhibitor MG132 (Fig. S4B).  
222 Performing immunoblot analysis of ATG8 protein levels in *N. benthamiana* leaves, we found  
223 that transient expression of XopL resulted in an accumulation of NBR1 and ATG8 proteins at  
224 2 dpi (Fig. 2B). While this was also consistent with elevated gene expression of ATG8,  
225 NBR1/Joka2 expression was only induced at 1 dpi but not 2 dpi upon XopL expression (Fig.  
226 S4C). Transient expression of the autophagy inhibitor AIMp showed similar expression trends  
227 (Fig. S4C). Treatment with ConA revealed that ATG8 levels could not be further enhanced  
228 when XopL was expressed (Fig. 2C), providing strong evidence that XopL inhibits autophagic  
229 turnover. We note that XopL accumulates under ConA treatment (Fig. 2C), which suggests that  
230 XopL is also subject to autophagic degradation.

231 To validate that XopL also acts as an autophagy suppressor during *Xcv* infection we constructed  
232 a *xopL* deletion mutant in *Xcv* WT and *Xcv ΔxopQ* backgrounds. *Xcv ΔxopL* displayed reduced  
233 growth and symptom development upon infection of tomato plants and the same, but to a lesser  
234 extent, was observed for *Xcv ΔxopL* in *N. benthamiana* (Fig S5A-E), demonstrating that XopL  
235 has a role during infection. Monitoring autophagosome-like structures in leaves transiently  
236 expressing GFP-ATG8e revealed that tissue infected with *Xcv ΔxopL* induced fewer GFP-  
237 ATG8e puncta than *Xcv* in the absence of ConA (Fig 2D, Fig S6A). Addition of ConA increased  
238 GFP-ATG8e puncta in leaves infected with *Xcv ΔxopL* but not in *Xcv*, indicating that XopL has  
239 a role in dampening autophagy during infection (Fig. 2D). By analyzing ATG8 and NBR1  
240 protein levels, we also verified that XopL partially contributes to ATG8 and NBR1/Joka2  
241 accumulation (Fig. 2E), supporting the notion that XopL suppresses autophagic degradation.  
242 We confirmed this when we monitored RFP-Joka2 in transiently expressing *N. benthamiana*  
243 *roq1* plants after *Xcv* infection. Infection with *Xcv* resulted in an induction of NBR1/Joka2  
244 bodies in comparison to *Xcv ΔxopL* infected leaves (Fig. S6B). Utilizing the quantitative dual-  
245 luciferase autophagy assay, we show that *Xcv ΔxopQ ΔxopL* was unable to suppress autophagy  
246 to levels observed in tissues infected with *Xcv ΔxopQ* levels, both at 2dpi (Fig. 2F), indicating  
247 that XopL has a major impact on autophagy during infection. However, *Xcv ΔxopQ ΔxopL* still

248 leads to a slight increase in both RLUC-ATG8a/FLUC and RLUC-NBR1/FLUC ratios,  
 249 suggesting that *Xcv* possesses another T3E with a redundant function.  
 250 To analyze whether XopL has similar functions in other plant species, we generated transgenic  
 251 *Arabidopsis thaliana* lines expressing GFP-XopL under the UBQ10 promoter. Similar to the  
 252 results we obtained in *N. benthamiana*, GFP-XopL transgenic *A. thaliana* plants showed  
 253 increased NBR1 protein abundance in the absence and presence of ConA treatment (Fig. S7A),  
 254 suggesting a block of NBR1 turnover. The early senescence phenotype of transgenic lines  
 255 expressing XopL (Fig. S7B) and elevated gene expression of *ATG8a* and *NBR1* is indicative of  
 256 altered autophagy activity (Fig. S7D). Imaging with confocal microscopy revealed that GFP-  
 257 XopL localizes to punctate structures in *A. thaliana* leaf epidermal cells (Fig. S7C).  
 258

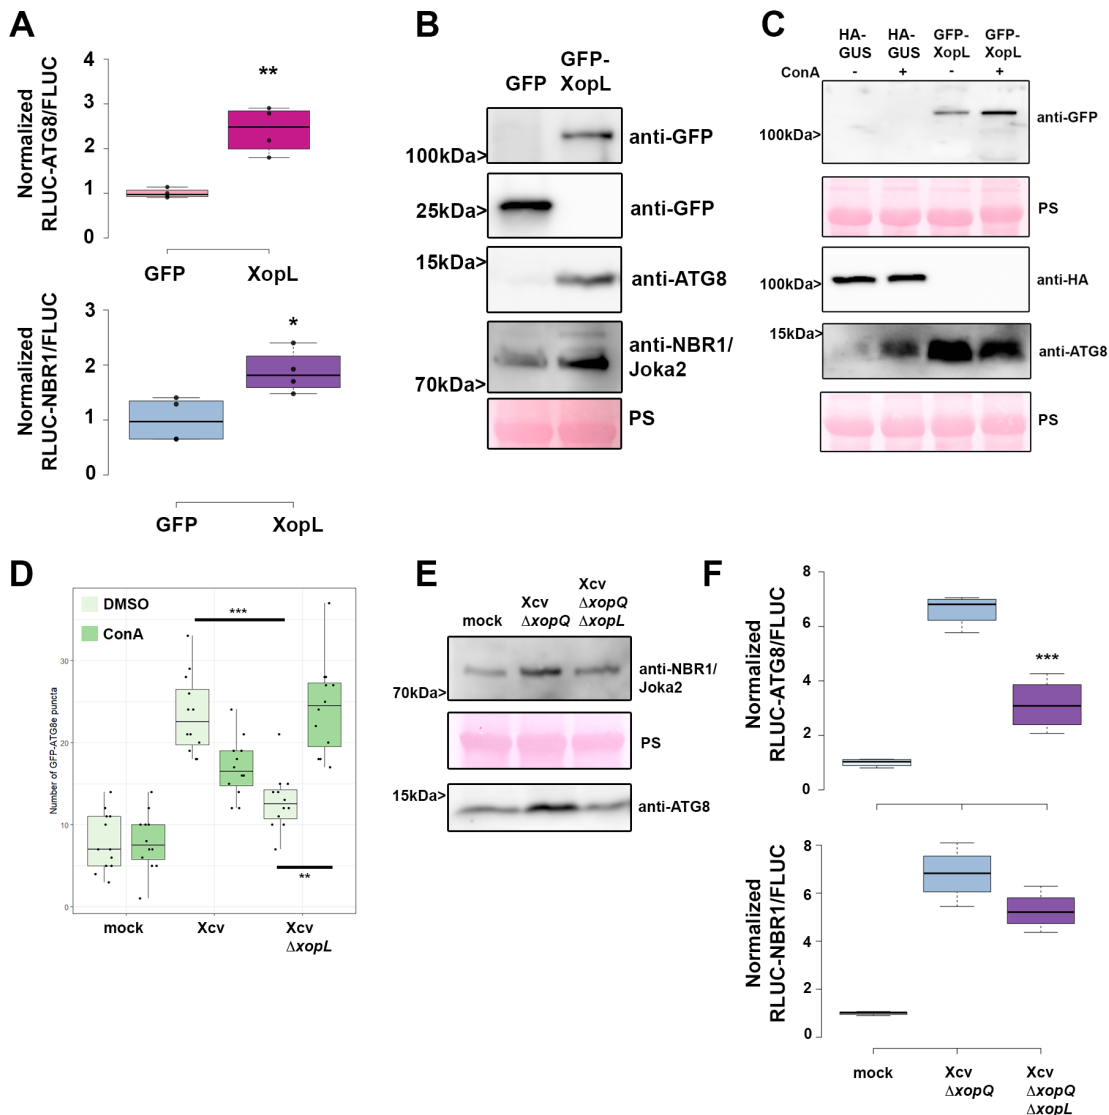

259  
 260 **Figure 2: Xanthomonas T3E XopL is suppressing autophagy**

261 (A) RLUC-ATG8a or RLUC-NBR1 constructs were coexpressed with internal control FLUC  
 262 in *N. benthamiana*. XopL or GFP constructs were co-infiltrated. RLUC and FLUC signals were  
 263 simultaneously measured in leaf extracts at 48 h post- infiltration using the dual-luciferase  
 264 system. Values represent the ratio of RLUC-ATG8a and FLUC activities to the mean of control  
 265 (n=4). Statistical significance ( $P < 0.01$ ) was shown by Student's *t*-test. The experiment was  
 266 repeated more than 3 times by with similar results.

267 **(B)** Immunoblot analysis of NBR1 and ATG8 protein levels in *N. benthamiana* plants  
268 transiently expressing GFP-XopL or GFP control at 2dpi verified with an anti-GFP antibody.  
269 Ponceau Staining (PS) served as a loading control. The experiment was repeated at least three  
270 times with similar results.

271 **(C)** Immunoblot analysis of NBR1 and ATG8 protein levels in *N. benthamiana* plants  
272 transiently expressing XopL or GUS control at 2dpi after ConA or DMSO treatment.  
273 Expression of GFP-XopL was verified with an anti-GFP antibody, while expression of GUS-  
274 HA was confirmed with an anti-HA antibody. Ponceau Staining (PS) served as a loading  
275 control. The experiment was repeated twice with similar results.

276 **(D)** GFP-ATG8g-labeled autophagosomes were quantified from plants infected with *Xcv*  
277  $\Delta xopQ$  or *Xcv*  $\Delta xopQ \Delta xopL$  at 2 dpi in the presence or absence of ConA. Puncta were calculated  
278 from z-stacks (15) of  $n=12$  individuals using ImageJ. Statistical significance (\*\*  $P < 0.01$ , \*\*\*  
279  $P < 0.001$ ) was determined by one way ANOVA. The experiment was repeated twice with  
280 similar results.

281 **(E)** Immunoblot analysis of NBR1 and ATG8 protein levels in *Xcv*  $\Delta xopQ$ , *Xcv*  $\Delta xopQ \Delta xopL$   
282 or mock infected *N. benthamiana* plants at 2dpi. Ponceau Staining (PS) served as a loading  
283 control. The experiment was repeated twice with similar results.

284 **(F)** RLUC-ATG8a or RLUC-NBR1 constructs were coexpressed with internal control FLUC  
285 in *N. benthamiana*. *Xcv*  $\Delta xopQ$  and *Xcv*  $\Delta xopQ \Delta xopL$  were co-infiltrated with Agrobacteria  
286 containing the respective constructs. RLUC and FLUC activities were simultaneously measured  
287 in leaf extracts at 48 h post- infiltration using the dual-luciferase system. Statistical significance  
288 comparing *Xcv*  $\Delta xopQ$  and *Xcv*  $\Delta xopQ \Delta xopL$  values (\*\*\* $P < 0.001$ ) was revealed by Student's  
289 *t*-test. The experiment was repeated 3 times with similar results.

290

### 291 ***XopL* interacts with and degrades the autophagy component SH3P2 contributing to *Xcv*** 292 ***virulence during infection***

293 Previously, XopL was characterized as belonging to a novel class of E3 ligases and is capable  
294 of suppressing plant defense responses. There are no known plant targets of XopL (Singer *et*  
295 *al*, 2013), so we carried out a yeast-two hybrid (Y2H) screen using a cDNA library from tobacco  
296 (*Nicotiana tabacum*) to investigate whether XopL directly targets autophagy components to act  
297 as an autophagy suppressor. Our previous interactions studies indicate that the tobacco cDNA  
298 library is sufficient to identify host targets of *Xcv* T3Es that are conserved across different plant  
299 species, such as pepper, tomato and *A. thaliana* (Albers *et al*, 2019; Üstün *et al.*, 2013; Üstün  
300 *et al*, 2014). One cDNA identified in the Y2H screening for XopL interacting proteins encoded  
301 a homologue of *A. thaliana* SH3P2, which has an amino acid identity of 74 % to the *N. tabacum*  
302 homologue (Fig S8A). Homologues are also present in *Nicotiana benthamiana* (NbSH3P2a and  
303 NbSH3P2b, 98% identity) and tomato (SlSH3P2, 96% to NtSH3P2) (Fig S8A, B). Direct  
304 interaction assays in yeast revealed that XopL is able to interact with SH3P2 from *N. tabacum*  
305 and *N. benthamiana* (Fig. 3A and Fig. S8C). SH3P2 from *A. thaliana* was previously identified  
306 as a novel autophagy component that interacts with ATG8 and binds to phosphatidylinositol 3-  
307 phosphate (PI3P) to regulate autophagosome formation, having also a potential role in late  
308 events of autophagosome biogenesis (Zhuang & Jiang, 2014; Zhuang *et al*, 2013). SH3P2 was  
309 also found to play a role in the recognition of ubiquitinated membrane proteins, and in targeting  
310 them to the endosomal sorting complexes required for transport (ESCRT) machinery (Nagel *et*  
311 *al*, 2017). We next sought to determine whether the interaction between XopL and SH3P2  
312 occurs *in planta*. Due to expression problems of tobacco SH3P2 and also due to their high  
313 identity, we conducted further interaction studies with AtSH3P2. Using bimolecular  
314 fluorescence complementation (BiFC) and *in vivo* co-immunoprecipitation (co-IP), we found  
315 that XopL and AtSH3P2 interact in the plant cell, in small punctate structures resembling  
316 autophagosomes and also in larger structures (Fig. 3B and C; Supp Video 1). Additional *in vitro*  
317 co-IP data, using *E. coli* produced recombinant MBP-XopL and GST-AtSH3P2, suggests that



318 XopL and SH3P2 might directly interact with each other (Fig. S8D). Given the fact that SH3P2  
319 from *A. thaliana* interacts with ATG8 and XopL localizes in puncta within plant cells (Zhuang  
320 *et al*, 2013; Erickson *et al*, 2018), we assessed whether XopL co-localizes with autophagosomes  
321 *in planta*. We were able to identify that transient expression of GFP-XopL in *N. benthamiana*  
322 with the autophagosome markers RFP-ATG8e and SH3P2-RFP resulted in co-localization (Fig.  
323 3D). SH3P2 also co-localized with ATG8e upon transient co-expression in *N. benthamiana*  
324 (Fig. Fig.3D). This further supports the idea that XopL is functioning in the autophagy pathway  
325 by associating with these components *in planta*. Since XopL possesses E3 ligase activity, we  
326 next sought to investigate whether XopL might destabilize SH3P2 via ubiquitination, and  
327 thereby block autophagic degradation. Indeed, *in planta* transient co-expression of GFP-XopL  
328 and AtSH3P2-GFP resulted in a reduction in the latter's protein abundance in *N. benthamiana*  
329 (Fig. 3E).

330 Previously, downregulation of SH3P2 in *A. thaliana* has been shown to reduce autophagic  
331 activity (Zhuang *et al*, 2013). However, the role of SH3P2 is still controversial, as another study  
332 identified that SH3P2 functions in clathrin-mediated endocytosis without having any obvious  
333 effects on dark-induced autophagy (Nagel *et al*, 2017). To shed light on the enigmatic and  
334 versatile function of SH3P2, we used VIGS in *N. benthamiana* targeting both endogenous  
335 isoforms *NbSH3P2a* and *b*. Silencing had no obvious phenotypic effect on plants, and silencing  
336 efficiency was assessed by qPCR (Fig. S9A and B). Subsequent immunoblot analysis revealed  
337 that in comparison to the pTRV2-GFP control, SH3P2 VIGS plants displayed accumulation of  
338 ATG8 protein levels, similar results to that reported by Zhuang *et al*. 2013 (Fig. S9C). To  
339 corroborate this finding, we transiently expressed GFP-ATG8e in control and silenced plants  
340 and monitored autophagosome formation upon AZD8055 treatment, a TOR inhibitor and  
341 autophagy activator. The number of autophagosomes increased upon AZD8055 treatment in  
342 both plants but were significantly less in SH3P2 VIGS plants when treated with ConA (Fig.  
343 S9D). This indicates that downregulation of SH3P2 in *N. benthamiana* impairs maturation of  
344 autophagosomes and hence autophagic degradation. Indeed, using confocal microscopy and  
345 GFP-ATG8e labelling, we observed aberrant autophagosomal structures in VIGS SH3P2  
346 plants, that might explain why autophagy is not entirely functional anymore. These data suggest  
347 that SH3P2 might be required during later steps of autophagosome formation, as  
348 autophagosomal structures seems to be normal during autophagy induction with AZD8055.  
349 VIGS in *N. benthamiana roq1* plants and subsequent bacterial growth measurements with *Xcv*  
350 and *Xcv ΔxopL* revealed that pTRV2-*SH3P2* plants are more susceptible towards *Xcv* (Fig. 3F).  
351 Essentially, partially reduced growth of *Xcv ΔxopL* was rescued in SH3P2-silenced plants  
352 strengthening our findings that XopL acts on *SH3P2* to suppress host autophagy and promote  
353 disease.

354

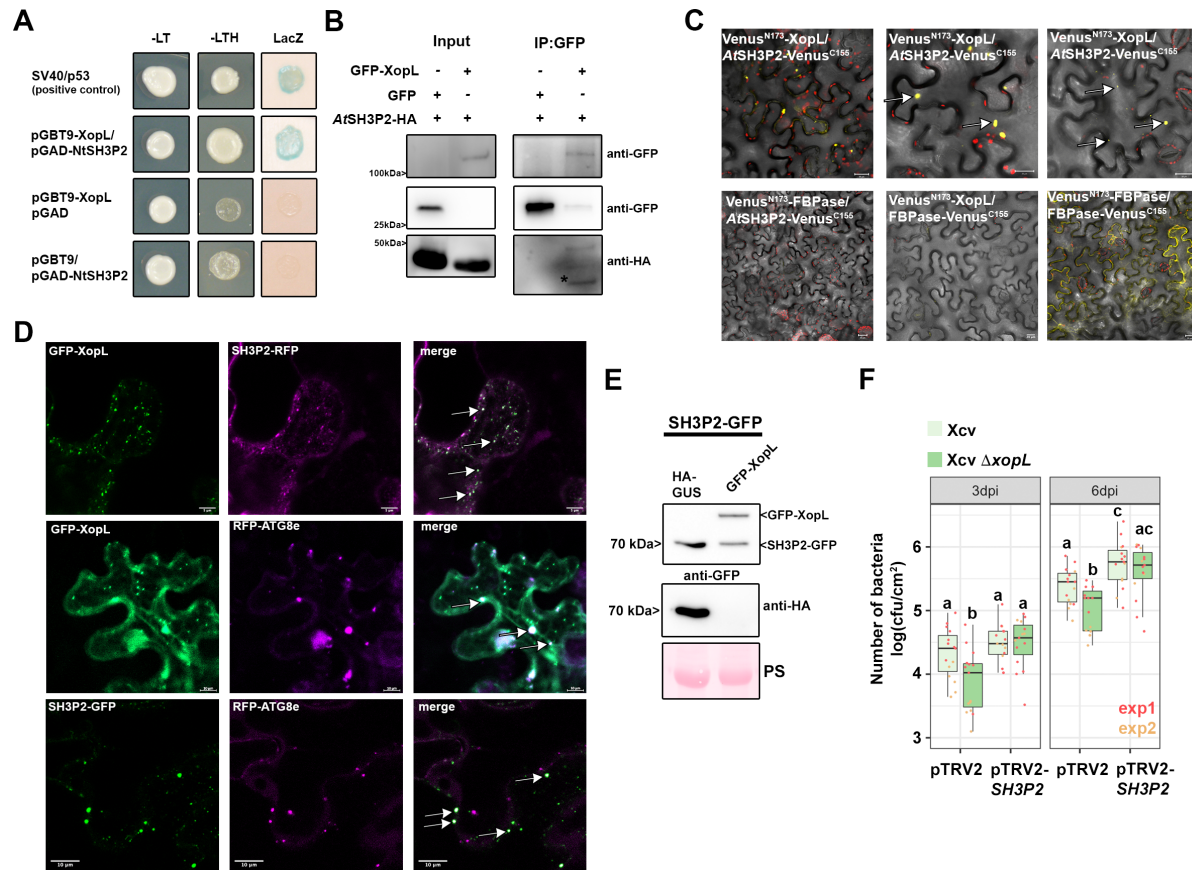

355  
356

### 357 **Figure 3: XopL interacts with and degrades SH3P2 and to boost Xcv virulence**

358 **(A)** Interaction of XopL with SH3P2 in yeast two-hybrid assays. XopL fused to the GAL4  
359 DNA-binding domain was expressed in combination with SH3P2 fused to the GAL4 activation  
360 domain (AD) in yeast strain Y190. Cells were grown on selective media before a LacZ filter  
361 assay was performed. pSV40/p53 served as positive control, while the empty AD or BD vector  
362 served as negative control. NtSH3P2 = *Nicotiana tabacum* SH3P2. -LT = yeast growth on  
363 medium without Leu and Trp, -HLT = yeast growth on medium lacking His, Leu, and Trp,  
364 indicating expression of the HIS3 reporter gene. LacZ, activity of the lacZ reporter gene.

365 **(B)** Coimmunoprecipitation of GFP-XopL with AtSH3P2-HA. GFP-XopL or GFP were  
366 transiently coexpressed with AtSH3P2-HA in leaves of *N. benthamiana*. After 48 h, total  
367 proteins (Input) were subjected to immunoprecipitation (IP) with GFP-Trap beads, followed by  
368 immunoblot analysis using either anti-GFP or anti-HA antibodies. AtSH3P2 = *Arabidopsis*  
369 *thaliana* SH3P2. Two repetitions with similar results have been conducted.

370 **(C)** Visualization of protein interactions *in planta* by the bimolecular fluorescence  
371 complementation assay. Yellow fluorescent protein (YFP) confocal microscopy images show  
372 *Nicotiana benthamiana* leaf epidermal cells transiently expressing Venus<sup>N173</sup>-XopL in  
373 combination with AtSH3P2-Venus<sup>C155</sup>. A positive control showing the dimerization of  
374 fructose-1,6-bisphosphatase (FBPase) within the cytosol. The red structures indicate  
375 autofluorescence of chloroplasts. The combination of Venus<sup>N173</sup>-XopL with FBPase-Venus<sup>C155</sup>  
376 or Venus<sup>N173</sup>-FBPase with AtSH3P2-Venus<sup>C155</sup> do not induce YFP fluorescence and serve as  
377 negative controls. Bars = 20 μm.

378 **(D)** Colocalization analysis of GFP-XopL with SH3P2-RFP, RFP-ATG8e and RFP-ATG8g in  
379 *N. benthamiana* leaves. Imaging was performed 2 d after transient expression and images  
380 represent single confocal planes from abaxial epidermal cells (scale bars = 20 μm and 10 μm,  
381 lower panel). White arrows indicate colocalization of GFP and RFP signals. The experiment  
382 was repeated twice with similar results.

383 (E) Total proteins were extracted 48 hpi with *A. tumefaciens* harboring the respective GFP-  
384 XopL, HA-XopL and SH3P2-GFP expression constructs. SH3P2-GFP protein levels (lower  
385 band) were detected using an anti-GFP antibody. Expression of the XopL was verified using an  
386 anti-HA or anti-GFP antibody. Expression of GUS-HA served as a control. Ponceau S staining  
387 serves as a loading control. The experiment was repeated three times with similar results.

388 (F) Growth of *Xcv* and *Xcv*  $\Delta xopL$  strains in *roq1 N. benthamiana* plants silenced for SH3P2  
389 (pTRV2-SH3P2) compared to control plants (pTRV2). Leaves were dip-inoculated with a  
390 bacteria suspension at OD<sub>600</sub> = 0.2 and bacteria were quantified at 3 and 6 dpi. Red and yellow  
391 data points indicate experimental repeats. Different letters indicate statistically different groups  
392 ( $P < 0.05$ ) as determined by one way ANOVA.

393

### 394 ***XopL* mediates proteasomal degradation of SH3P2 via its E3 ligase activity**

395 Our results so far suggest that XopL might manipulate autophagy by interacting and degrading  
396 the autophagy component SH3P2. Previous research on SH3P2 revealed that RNAi-mediated  
397 downregulation of AtSH3P2 affects the autophagy pathway (Zhuang *et al*, 2013). To  
398 understand how SH3P2 is degraded by XopL we analyzed the degradation mechanisms in more  
399 detail. Firstly, degradation of AtSH3P2 by XopL was dependent on a functional proteasome, as  
400 chemical inhibition of the proteasome with MG132 partially restored AtSH3P2-GFP protein  
401 levels (Fig. 4A). Changes in SH3P2 protein levels were due to post-transcriptional events, as  
402 gene expression of SH3P2 is rather induced upon transient expression of XopL in *N.*  
403 *benthamiana*, (Fig S10A). To assess whether the proteasome-mediated degradation of SH3P2  
404 was directly mediated by XopL and its E3 ligase activity, we performed an *in vitro*  
405 ubiquitination assay. In the presence of all required components of the E1-E2-E3 system, we  
406 observed that GST-XopL ubiquitinated MBP-AtSH3P2, which is indicated by a laddering  
407 pattern, leading to larger sized molecular species of MBP-AtSH3P2, when probed with the anti-  
408 MBP antibody (Fig. 4B). To address whether E3 ligase activity of XopL is crucial in the SH3P2-  
409 dependent modulation of host autophagy, we employed the triple point mutant of XopL<sub>H584A</sub>  
410 L<sub>585A</sub> G<sub>586E</sub> (hereafter referred to as XopL  $\Delta E3$ ), lacking E3 ligase activity (Singer *et al*, 2013;  
411 Erickson *et al*, 2018). Transient co-expression revealed that XopL requires its E3 ligase activity  
412 to trigger the degradation of AtSH3P2 in *N. benthamiana* (Fig. 4C). This was not due to an  
413 altered localization of XopL  $\Delta E3$ , as it still co-localizes with AtSH3P2 upon transient  
414 expression in *N. benthamiana* (Fig. S11A). In addition, XopL  $\Delta E3$  was also unable to  
415 ubiquitinate SH3P2 in an *in vitro* ubiquitination assay (Fig. S11B). Consistent with its inability  
416 to degrade SH3P2 *in planta*, XopL  $\Delta E3$  did not lead to a suppression of autophagy responses  
417 in the quantitative luciferase autophagy assay and increase in ATG8 protein levels (Fig. 4D and  
418 E). XopL $\Delta E3$  is also more unstable than XopL WT, suggesting that its E3 ligase activity is  
419 crucial to maintaining its stability, likely through its function in subverting autophagy (Fig. 4F).  
420 Taken together, our findings support the notion that the E3 ligase activity of XopL as well as  
421 its ability to directly ubiquitinate and degrade AtSH3P2 promote suppression of autophagy.

422

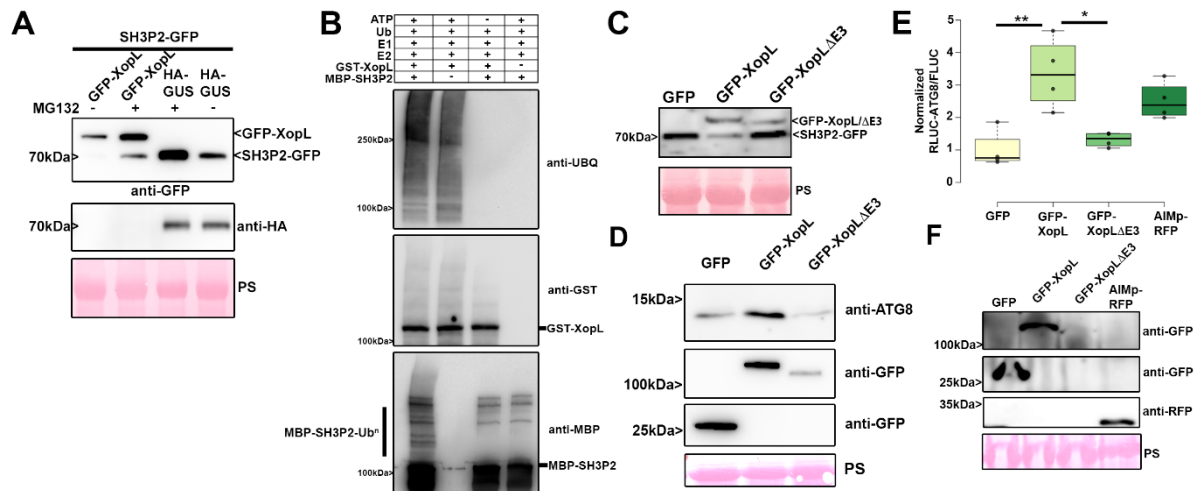

423  
424  
425

**Figure 4. XopL mediates the proteasome degradation of SH3P2 via its E3 ligase activity**

427 (A) SH3P2-GFP was transiently coexpressed together with GUS-HA and GFP-XopL in *N.*  
428 *benthamiana* using agroinfiltration. At 42 hpi, 200 μM MG132 was infiltrated into *A.*  
429 *tumefaciens*-inoculated leaves, and leaf material was collected 48 hpi. Expression of SH3P2-  
430 GFP (lower band) and GFP-XopL (upper band) was detected using an anti-GFP antibody. GUS-  
431 HA expression was confirmed with an anti-HA antibody. Ponceau S staining serves as a loading  
432 control. The experiment was repeated three times with similar results.

433 (B) *In vitro* ubiquitination assay reveals ubiquitination of SH3P2 by XopL. GST-XopL, and  
434 MBP-SH3P2 were tested using the Arabidopsis His-AtUBA1 and His-AtUBC8. Lanes 2 to 4  
435 are negative controls. Proteins were separated by SDS-PAGE and detected by immunoblotting  
436 using the indicated antibodies. The experiment was repeated twice with similar results.

437 (C) SH3P2-GFP was transiently coexpressed together with GFP, GFP-XopL and GFP-XopL  
438 ΔE3 in *N. benthamiana* using agroinfiltration. GFP protein levels were detected with an anti-  
439 GFP antibody. Ponceau S staining serves as a loading control. The experiment was repeated  
440 three times with similar results.

441 (D) Immunoblot analysis of ATG8 protein levels in *N. benthamiana* plants transiently  
442 expressing GFP-XopL, GFP-XopL ΔE3 or GFP control at 2dpi. Expression of binary constructs  
443 was verified with an anti-GFP antibody. Ponceau Staining (PS) served as a loading control. The  
444 experiment was repeated twice with similar results.

445 (E) RLUC-ATG8a constructs were coexpressed with internal control FLUC in *N. benthamiana*.  
446 GFP-XopL, GFP-XopL ΔE3 or GFP control were co-infiltrated together with RLUC/FLUC  
447 mixture. *Renilla* and *Firefly* luciferase activities were simultaneously measured in leaf extracts  
448 at 48 hpi using the dual-luciferase system. Values represent the ratio of RLUC-ATG8a and  
449 FLUC activities (n=4). Statistical significance (\*  $P < 0.5$ , \*\*  $P < 0.01$ ) was revealed by  
450 Student's *t*-test. The experiment was repeated 3 times. Expression of proteins was verified with  
451 indicated antibodies.

452

***NBR1/Joka2-mediated selective autophagy degrades ubiquitinated XopL***

454 While we investigated the effect of *Xcv* and its T3E XopL on host autophagy, we noticed that  
455 NBR1/Joka2 responds at both transcript and protein levels during infection (Fig. 1B, 1D). We  
456 also observed that XopL protein accumulated under ConA treatment (Fig. 2C, Fig S5A), hinting  
457 that it was subject to autophagic degradation. Previous studies imply that NBR1/Joka2 mediates  
458 xenophagy by degrading viral particles, and that Joka2 is required for immunity against bacteria  
459 and *Phytophthora* (Üstün *et al.*, 2018; Dagdas *et al.*, 2016; Hafrén *et al.*, 2018). However, the  
460 role of NBR1-mediated xenophagy in plant-*Phytophthora* and plant-bacteria interactions

461 remains unknown. Plant NBR1 is a hybrid of the mammalian autophagy adaptors NBR1 and  
462 p62/SQSTM1 (Svenning *et al*, 2011). The latter was shown to mediate xenophagy of  
463 *Mycobacterium tuberculosis* (Mtb) by binding to the Mtb ubiquitin-binding protein Rv1468c  
464 and ubiquitin-coated *Salmonella enterica* in human cells (Chai *et al*, 2019; Zheng *et al*, 2009).  
465 To corroborate our previous finding that XopL accumulates when autophagy is blocked, we  
466 coexpressed GFP-XopL with autophagy inhibitor AIMp-RFP in *N. benthamiana* leaves.  
467 Immunoblot analysis revealed that indeed XopL also accumulates in the presence of autophagy  
468 inhibitor AIMp (Fig. 5A). As NBR1/Joka2 bodies were substantially induced during *Xcv*  
469 infection (Fig. S6), and block of autophagic degradation using ConA caused accumulation of  
470 GFP-XopL in vacuoles of *A. thaliana* (Fig. S12), we decided to examine whether XopL and  
471 NBR1/Joka2 associate *in planta*. Intriguingly, we discovered that XopL co-localizes with  
472 NBR1/Joka2 in puncta (Fig. 5B). Association of both proteins was determined using Förster  
473 resonance energy transfer by fluorescence lifetime imaging microscopy (FRET-FLIM). Only  
474 in the presence of RFP-XopL a significant reduction of 0.1 ns in the lifetime of the donor Joka2  
475 was observed in comparison to co-expression of RFP or donor alone (Fig. 5C). This reduction  
476 of lifetime is similar to what was achieved with the positive control GFP-Joka2/RFP-ATG8e.  
477 These findings prompted us to investigate whether XopL might be targeted by NBR1/Joka2 for  
478 autophagic degradation, similar to insoluble ubiquitinated protein aggregates (Zhou *et al*,  
479 2013). Performing pull-down experiments with GFP-XopL, we discovered that XopL  
480 associates with NBR1/Joka2 *in planta* (Fig. 5D), confirming the results of our FRET-FLIM and  
481 co-localization studies. To address whether E3 ligase activity of XopL is required for  
482 interaction, we employed XopL  $\Delta$ E3, lacking E3 ligase activity. Co-IP experiments revealed  
483 that XopL  $\Delta$ E3 was also able to pull-down NBR1/Joka2 after transient expression in *N.*  
484 *benthamiana* (Fig. 5E). This suggests that NBR1/Joka2 may not mediate the degradation of a  
485 complex containing XopL and its ubiquitinated target protein(s), but rather targets XopL for  
486 autophagic degradation. Given the fact that XopL is degraded by autophagy and associates with  
487 NBR1/Joka2, we next analyzed stability of XopL in Joka2-silenced *N. benthamiana* plants.  
488 Silencing of NBR1/Joka2 was confirmed by qPCR (Fig. S13A). Indeed, we could observe an  
489 increase in GFP-XopL protein abundance (Fig. 5F), but not for GFP (Fig. S13B), in pTRV2-  
490 Joka2 plants, arguing for a direct participation of NBR1/Joka2 in XopL turnover. To assess  
491 whether this might impact pathogenicity of *Xcv* we performed bacterial growth assays using the  
492 pTRV2-Joka2 plants. Increased growth at 3 dpi of *Xcv*  $\Delta$ xopQ in *N. benthamiana* plants silenced  
493 for Joka2 strengthened our finding that Joka2 is having anti-bacterial effects on *Xcv* early on  
494 during infection (Fig. 5G). As NBR1/Joka2 or p62 recognize their cargos by their ability to  
495 bind ubiquitinated substrates, we hypothesized that XopL might be ubiquitinated *in planta*. To  
496 test this, we transiently expressed GFP-XopL in *N. benthamiana* leaves and then  
497 immunoprecipitated GFP-XopL from leaf protein extracts. Ubiquitinated GFP-XopL was  
498 detected using immunoblotting. GFP-XopL, but not the GFP control, displayed  
499 polyubiquitination *in planta*, while GFP-XopL  $\Delta$ E3 showed reduced polyubiquitination (Fig.  
500 5H). To further confirm the ubiquitination of XopL, we purified total ubiquitinated proteins  
501 using the ubiquitin pan selector, which is based on a high-affinity single domain antibody that  
502 is covalently immobilized on cross-linked agarose beads. We detected a smear of high-  
503 molecular weight bands including the full-length XopL protein (Fig. 5I), which was strongly  
504 enhanced when we co-expressed with AIMp but absent in the GFP control (Fig. S14)  
505 To identify ubiquitinated residues within the XopL protein, we immunoprecipitated GFP-XopL  
506 from *N. benthamiana* leaves transiently expressing GFP-XopL and performed mass  
507 spectrometry (MS) analysis. *In planta* MS analysis revealed one potential ubiquitination site at  
508 lysine 191 (K191) in the N-terminal part of XopL (Fig. S15A). For plant E3 ligases such as  
509 PUB22, it has been reported that its stability is dependent on its autoubiquitination activity  
510 (Furlan *et al*, 2017). Using MBP-XopL in an *in vitro* ubiquitination assay we confirmed self-  
511 ubiquitination (Fig. S15B), indicated by the presence of higher molecular weight bands probing

512 with an anti-MBP antibody. Performing LC-MS/MS we did detect the same ubiquitination  
513 (K191) site identified *in planta* when we analyzed *in vitro* ubiquitination samples containing  
514 GST-XopL (Fig. S15C). Additionally, an *in vitro* self-ubiquitination assay comparing XopL  
515 WT to its K191A mutant counterpart shows that K191A displays less intensity on its high  
516 molecular weight smear, suggesting that K191A is less ubiquitinated in this assay (Fig. S16A).  
517 This strongly argues for K191A being an autoubiquitination site of XopL. This is strengthened  
518 by our findings showing that the mutation of lysine 191 to alanine (K191A) rendered the XopL  
519 K191A more stable than WT XopL (Fig. 5J) without altering its subcellular localization (Fig.  
520 S16B). Changes in XopL vs. K191A protein levels were due to post-transcriptional events, as  
521 gene expression of XopL and XopL K191A are similar upon transient expression in *N.*  
522 *benthamiana* (Fig S16C) but did not abolish ubiquitination of XopL and association with  
523 autophagic machinery as shown by co-IP with NBR1/Joka2 (Fig. 5K, Fig. S16D). However,  
524 we cannot rule out trans-ubiquitination by plant E3 ligases, as XopL  $\Delta$ E3 still interacts with  
525 NBR1 and is still ubiquitinated *in planta*. Immunoblot analysis also revealed that XopL  $\Delta$ E3 is  
526 more unstable compared to XopL WT and degraded by autophagy, as it is not able to block  
527 autophagy (Fig S17). This might indicate the presence of additional ubiquitination sites in  
528 XopL. Taken together, our results suggest that XopL is ubiquitinated *in planta* and subjected to  
529 NBR1/Joka2-dependent selective autophagy.  
530

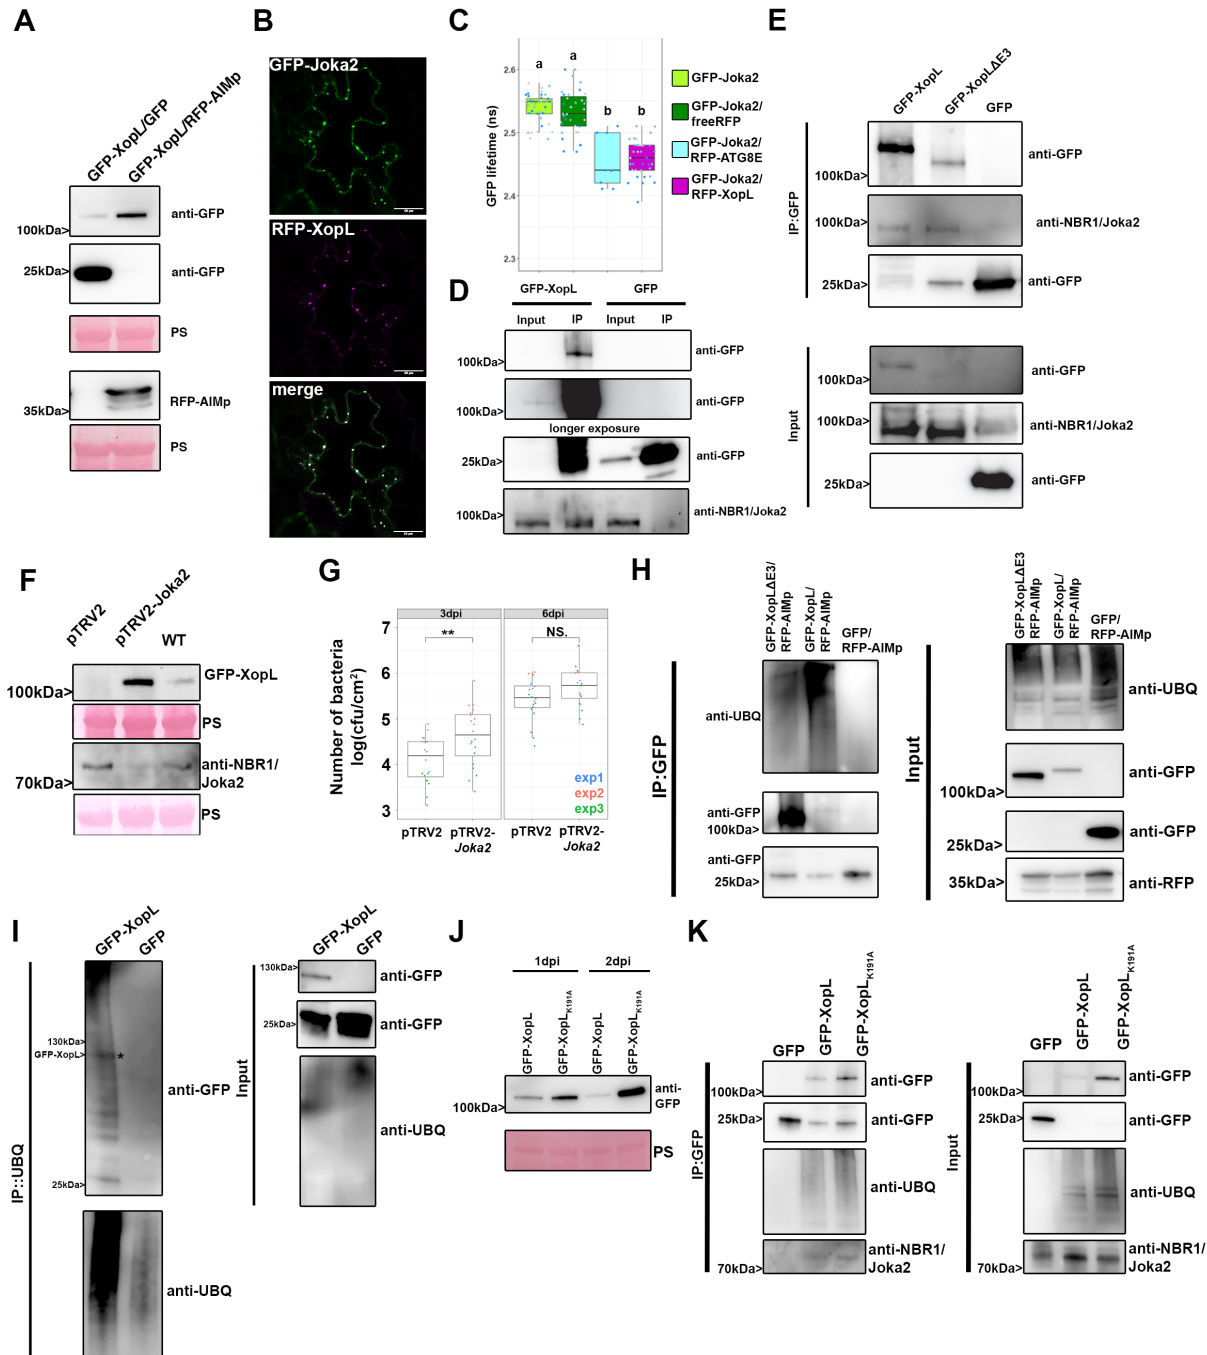

531  
532

533 **Figure 5: XopL is ubiquitinated in planta and degraded by NBR1-mediated selective**  
534 **autophagy**

535 (A) GFP-XopL was coexpressed with GFP or AIMP-RFP. Proteins were separated by SDS-  
536 PAGE and detected by immunoblotting using the indicated antibodies. Ponceau Staining (PS)  
537 served as a loading control. The experiment was repeated three times with similar results.

538 (B) Colocalization of GFP-XopL with RFP-Joka2 in *N. benthamiana* leaves. Imaging was  
539 performed 2 d after transient expression and images represent single confocal planes from  
540 abaxial epidermal cells (bars = 20 μm). The experiment was repeated twice with similar results.

541 (C) FRET FLIM measurements of GFP-Joka2 and RFP-XopL in *N. benthamiana* leaves. The  
542 freeRFP construct served as a negative control and RFP-ATG8E (n = 9) as a positive control.  
543 Scattered points show individual data points, color indicates biological repeats. The lifetime (in  
544 ns) of GFP-Joka2 (donor, n = 41) was significantly reduced in the presence of RFP-XopL (n =

545 40) but not in the presence of freeRFP (n = 35). Significant differences were calculated using  
546 Wilcoxon rank sum test, with significantly different groups denoted by different letters. The  
547 experiment was repeated three times with similar results.

548 **(D)** Immunoprecipitation (IP) of GFP-XopL reveals association with NBR1. Immunoblots of  
549 input and IP samples from *N. benthamiana* plants transiently expressing GFP or GFP-XopL  
550 were probed with anti-GFP and anti-NBR1 antibodies.

551 **(E)** Immunoprecipitation (IP) of GFP-XopL and GFP-XopL  $\Delta E3$  reveals association with  
552 NBR1. Immunoblots of input and IP samples from *N. benthamiana* plants transiently  
553 expressing GFP, GFP-XopL and GFP-XopL  $\Delta E3$  were probed with anti-GFP and anti-NBR1  
554 antibodies.

555 **(F)** GFP-XopL was transiently expressed in pTRV2, pTRV2-Joka2 and *N. benthamiana* WT  
556 plants. Expression of binary constructs was verified with an anti-GFP antibody. Joka2 silencing  
557 was verified using an anti-NBR1 antibody. Ponceau Staining (PS) served as a loading control.  
558 The experiment was repeated twice with similar results.

559 **(G)** Growth of *Xcv*  $\Delta xopQ$  in *N. benthamiana* plants silenced for *Joka2* (pTRV2-Joka2)  
560 compared to control plants (pTRV2). Leaves were dip-inoculated with a bacteria suspension at  
561  $OD_{600} = 0.2$ . and bacteria were quantified at 3 and 6 dpi. Red, blue, and green data points  
562 represent repeats of the experiments. Significant differences were calculated using Student's *t*-  
563 test and are indicated by: \*\*,  $P < 0.01$ . The experiment was repeated three times with similar  
564 trends.

565 **(H)** GFP-XopL, GFP-XopL  $\Delta E3$  were transiently expressed in *N. benthamiana*. RFP-AIMp  
566 was co-infiltrated to stabilize both XopL variants. Samples were taken 48 hpi, and total proteins  
567 (Input) were subjected to immunoprecipitation (IP) with GFP-Trap beads, followed by  
568 immunoblot analysis of the precipitates using either anti-GFP or anti-ubiquitin antibodies. GFP  
569 served as a negative control. RFP-AIMp expression was verified by an anti-RFP antibody. The  
570 experiment was repeated three times with similar results.

571 **(I)** GFP-XopL was transiently expressed in *N. benthamiana*. Samples were taken 48 hpi, and  
572 total proteins (Input) were subjected to immunoprecipitation (IP) with the ubiquitin pan  
573 selector, followed by immunoblot analysis of the precipitates using either anti-GFP or anti-  
574 ubiquitin antibodies. GFP served as a control. Asterisk indicates the GFP-XopL full-length  
575 protein. The experiment was repeated two times with similar results.

576 **(J)** Immunoblot analysis GFP-XopL and GFP-XopL<sub>K191A</sub> at 1 and 2 dpi using an anti-GFP  
577 antibody. Ponceau Staining (PS) served as a loading control. The experiment was repeated three  
578 times with similar results.

579 **(K)** GFP-XopL and GFP-XopL<sub>K191A</sub> were transiently expressed in *N. benthamiana*. Samples  
580 were taken 48 hpi, and total proteins (Input) were subjected to immunoprecipitation (IP) with  
581 GFP-Trap beads, followed by immunoblot analysis of the precipitates using either anti-GFP,  
582 anti-ubiquitin and anti-NBR1 antibodies. GFP served as a control. The experiment was repeated  
583 three times with similar results.

584

## 585 Discussion

586

587 Here, by studying *Xanthomonas*-host interactions, we revealed a complex multi-layered  
588 regulatory role of autophagy in plant immunity. We demonstrate that *Xanthomonas* can subvert  
589 plant autophagy which is achieved by the T3E XopL. Through its E3 ligase activity, XopL can  
590 ubiquitinate and degrade SH3P2, an autophagy component functioning in autophagosome  
591 biogenesis. This in turn dampens autophagy to boost the virulence of *Xanthomonas*. However,  
592 the same T3E is targeted by NBR1/Joka2-triggered selective autophagy/xenophagy which  
593 constitutes a novel form of plant defense mechanism (Fig. 6). The mutual targeting of pathogen



594 effector XopL and plant protein SH3P2 unveils how different layers of regulation contribute to  
595 autophagy pathway specificity during host-bacteria interactions.  
596

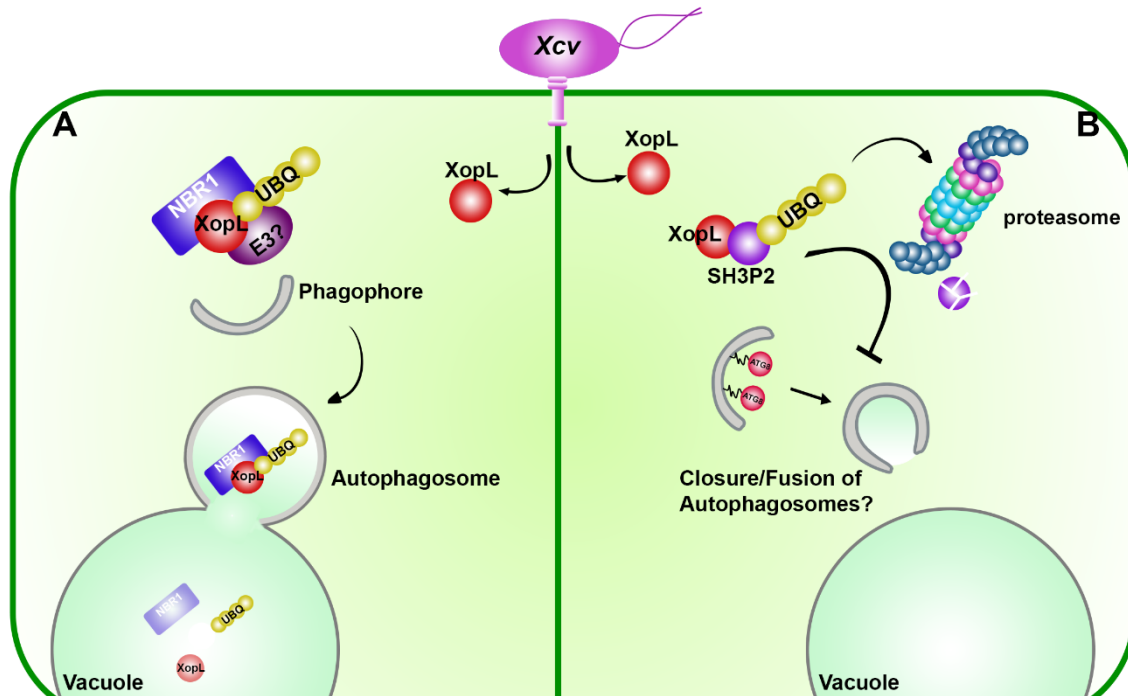

597  
598

599 **Figure 6: Model illustrating the function of XopL**

600 **(A) Xenophagy of XopL:** Upon delivery of XopL in the plant XopL undergoes self-  
601 ubiquitination and possible ubiquitination by an unknown host E3 ligase. Joka2/NBR1  
602 associates with XopL and triggers its degradation via the selective autophagy pathway in the  
603 vacuole. **(B) XopL blocks autophagy:** XopL interacts with autophagy component SH3P2  
604 inside the cell and ubiquitinates it to degrade it via the 26S proteasome. Degradation of SH3P2  
605 results in defects of autophagosome delivery into the vacuole and hence suppresses autophagy.

606

607 *Autophagy in host-immune interactions*

608 In animals, several pathogenic bacteria have been identified to modulate the autophagy pathway  
609 to their own benefit (Huan & Brummel, 2014). Many intracellular animal pathogenic bacteria  
610 can be eliminated by autophagy, while others (such as *Shigella*, *Yersinia* and *Listeria*), are able  
611 to exploit autophagy to increase their pathogenicity (Huan & Brummel, 2014). In plants, several  
612 studies have highlighted that pathogens manipulate the autophagy pathway (Leary *et al*, 2018).  
613 More specifically, the plant pathogenic bacterium *Pseudomonas syringae* pv. *tomato* (*Pst*) has  
614 been shown to utilize effectors to modulate autophagic degradation (Üstün *et al*, 2018; Üstün  
615 *et al*, 2016). With *Xcv*, we have identified another plant pathogenic bacterium that modulates  
616 autophagy, similar to *Pst*, in an effector-dependent manner. Although, both pathogens have the  
617 same habitat and hemi-biotrophic lifestyle, they act in different ways on the autophagy pathway.  
618 For *Xcv* inhibition of the autophagy pathway is crucial to maintain pathogenicity while *Pst*  
619 activates it for its own benefit (Üstün *et al*, 2018). Previously, it has been reasoned that  
620 autophagy activation might be essential to maintain plant viability and lifespan (Hafrén *et al*,  
621 2018). However, autophagy may not be required for this during *Xcv* infection, as it has been  
622 shown that T3Es XopD and XopJ are able to prolong the biotrophic phase by other mechanisms  
623 (Üstün *et al*, 2013; (Kim *et al*, 2008). As such, autophagy is dispensable for the virulence of  
624 *Xcv* and actively dampened to boost virulence and partially prevent xenophagy of XopL. Within  
625 the realm of xenophagy, the degradation of effectors by autophagy can be considered as a form  
626 of “effectorphagy”. Perturbation of general autophagy is achieved by degrading SH3P2 through

627 the action of T3E XopL. SH3P2 was first identified as a novel autophagy component,  
628 stimulating autophagosome formation during nitrogen starvation and BTH-triggered immune  
629 responses (Zhuang *et al*, 2013). Later studies also showed that SH3P2 plays a key role in  
630 membrane tubulation during cell plate formation (Ahn *et al*, 2017) and clathrin-mediated  
631 endosomal sorting and degradation, with no effect in dark-induced autophagy (Nagel *et al*,  
632 2017). Our findings that silencing of SH3P2 from *N. benthamiana* impairs autophagy and  
633 somewhat promotes pathogenicity sheds further light on its diverse functions. However, the  
634 effects of XopL on SH3P2 and increasing virulence of *Xcv* might not only be attributed to its  
635 function in autophagy. Because endocytic trafficking also plays a major role in plant immunity  
636 (Gu *et al*, 2017), it is likely that XopL has a function beyond autophagy to impair plant defense  
637 mechanisms. This is also supported by the fact that XopL can reduce PTI responses (Singer *et*  
638 *al*, 2013), which is not due its function in autophagy, as autophagy deficiency has no impact on  
639 PTI responses (Lenz *et al*, 2011). Previously, XopL was also shown to impact stromule  
640 formation by localizing to microtubules (Erickson *et al*, 2018), which was shown only for the  
641 XopL version lacking E3 ligase activity. Although, we do not see any microtubule localization  
642 of the XopL  $\Delta$ E3 version, XopL might affect stromule formation as they are thought to be  
643 recognized by autophagic membranes prior autophagic degradation (Marshall & Vierstra,  
644 2018).

#### 645 *Role of xenophagy in immunity*

646 One of the best studied selective autophagy receptors across kingdoms is NBR1/p62 that plays  
647 a central role in xenophagy and degradation of protein aggregates (Kirkin *et al*, 2009; Svenning  
648 *et al.*, 2011). Its role in plant immune responses has been shown by the involvement of  
649 NBR1/Joka2-mediated selective autophagy in restricting pathogen growth or disease  
650 progression during *P. infestans* or *Pst* infection (Üstün *et al*, 2018, Dagdas *et al*, 2016). In  
651 animals, p62, the counterpart of plant NBR1, functions to mediate xenophagy, which has been  
652 also described for NBR1 in plants in a plant-virus infection context but not for other plant  
653 pathogens (Hafrén *et al*, 2017, Hafrén *et al*, 2018). Our analysis provides the first evidence that  
654 like viral proteins, bacterial effector XopL constitutes a target of NBR1-mediated selective  
655 autophagy. This sheds light on previous findings about the role of NBR1/Joka2 in plant  
656 immunity and makes it a central hub in plant-microbe interactions. Consequently, XopL  
657 developed the ability to suppress autophagy, to boost the virulence of *Xcv*. But does XopL  
658 suppress autophagy to an extent to escape its own degradation? Indeed, treating plants with  
659 ConA or expressing AIMp still stabilize XopL protein levels, indicating that the effect of XopL  
660 on the autophagy pathway is either very specific or not sufficient to shut down the pathway  
661 completely. It is also possible that XopL is degraded by other additional mechanisms such as  
662 endocytosis or proteasome-mediated degradation as it most likely ubiquitinated by plant E3  
663 ligases. In line with our observations on the autophagy pathway is that the ability of XopL to  
664 suppress the autophagy is still less than the recently discovered autophagy inhibitor AIMp  
665 (Pandey *et al*, 2021). This is also in line with the fact that loss of SH3P2 is only partially  
666 suppressing autophagy formation (Zhuang *et al*, 2013) while silencing of ATG7 or expression  
667 of AIMp result in a complete block of autophagy. Currently, we also do not know whether  
668 SH3P2 might only affect a subset of ATG8 isoforms to facilitate autophagosome formation.  
669 Thus, it might be also possible that the NBR1/Joka2-selective autophagy pathway might  
670 involve ATG8 isoforms that do not require SH3P2.

671  
672 To date, it has not been reported that bacterial effectors in animals and plants are removed by  
673 selective autophagy as an anti-microbial response. Interestingly, the *Salmonella* effector SseL,  
674 which inhibits selective autophagy to abolish p62-dependent degradation of *Salmonella*, was  
675 also found to interact with p62 (Mesquita *et al*, 2012). This might suggest the possibility that  
676 SseL might also have been an autophagy target before it acquired its function to block this  
677 pathway via its deubiquitinase activity (Mesquita *et al*, 2012). We hypothesize that NBR1/p62

678 might have evolved to have a function in anti-bacterial autophagy by triggering xenophagy of  
679 bacterial molecules as an alternative strategy to degrade entire intracellular bacteria. This may  
680 have happened for the function of NBR1 in plants, as fungal and oomycete pathogens as well  
681 as Gram-negative bacteria reside in the extracellular space. Animal pathogens also occupy the  
682 extracellular space, before entering the host cell. In the case of *Salmonella*, it first needs to  
683 inject bacterial effectors via its SPI-1 T3SS to establish internalization and its replication niche  
684 (Lou *et al*, 2019). It is therefore tempting to speculate that these effectors may be targeted by  
685 selective autophagy mechanisms as an early defense mechanism of the immune system. Similar  
686 to XopL, several of the SPI1 T3Es can mimic E3 ligases and/or are ubiquitinated in the host  
687 cell (Kubori & Galan, 2003), making them potential targets for NBR1/p62-mediated selective  
688 autophagy. Indeed, T3Es SopA and SopE have been reported to be degraded through the  
689 proteasome (Kubori & Galan, 2003; Zhang *et al*, 2005). A possible degradation by autophagy  
690 was not investigated in these studies. Our results also suggest that XopL is targeted by a host  
691 E3 ligase for degradation as the XopL variant lacking E3 ligase activity is still ubiquitinated *in*  
692 *planta* and degraded by autophagy. Several E3 ligases have been implicated in plant-microbe  
693 interactions, which opens up the possibility that they may target microbial proteins (Furlan *et*  
694 *al*, 2012).

695  
696 Although plant pathogenic bacteria possess T3Es that are implicated in the host ubiquitin  
697 system, to date there is no evidence that they might be ubiquitinated in the host. In addition, we  
698 identified that XopL undergoes self-ubiquitination, which has not been reported for animal and  
699 plant pathogenic bacterial effectors.

700 In this scenario, it is tempting to speculate whether the self-ubiquitination activity of XopL  
701 attracts it to the autophagy pathway. Although the biological significance of K191 remains  
702 elusive, it might still have regulatory functions. To date, self-ubiquitination of E3 ligases has  
703 been assigned as a mechanism of self-regulation through which their activity is controlled  
704 (Furlan *et al.*, 2017). In the case of bacterial T3Es that mimic E3 ligases, it might be a strategy  
705 to trick degradation systems. Other post-translational modifications of T3Es such as  
706 phosphorylation of AvrPtoB have been found to crucial for its virulence function (Lei *et al*,  
707 2020), which might be also the case for the ubiquitination of XopL. Our results suggest that  
708 ubiquitinated XopL is targeted for autophagic degradation which might be indeed a strategy to  
709 recruit different autophagy components. Indeed, we can find a high conservation of K191 in  
710 several other XopL-like T3Es across different *Xanthomonas* species (Fig S18), which would  
711 be in favor of the proposed hijacking hypothesis. However, the fact that the K191 variant is still  
712 ubiquitinated *in planta* and associates with NBR1 and other autophagy components are not in  
713 favor of this hypothesis. The discovery of other alternative ubiquitination sites in XopL will  
714 help us to unravel why XopL undergoes self-ubiquitination and how this might contribute to its  
715 virulence.

716  
717 Taken together, we provide a primary example where a bacterial effector subverts host  
718 autophagy to downregulate host immunity, and the autophagic machinery in turn targets the  
719 same bacterial effector for degradation. Thus, this reveals a complex multi-layered role of  
720 autophagy particularly in the context of immunity and disease. Additionally, XopL possesses  
721 self-ubiquitination activity, which some evidence we have uncovered here suggest that this  
722 functions to hijack the host autophagy system.

## 723 724 **Acknowledgements**

725 We thank Ingrid Schiebl for the initial Y2H screen with XopL. We also thank Tom Denyer for  
726 critical reading of the manuscript. We thank Johannes Stuttmann for the *roq1 N. benthamiana*  
727 seeds. We thank Silke Wahl and Irina Droste-Borel for technical support for the proteomics  
728 assay. This work was supported by an Emmy Noether Fellowship GZ: UE188/2-1 from the

729 Deutsche Forschungsgemeinschaft (DFG; to S.Ü.), and through the collaborative research  
730 council 1101 (SFB1101; to G.L.). E.A.M. was supported by EU Horizon 2020 MSCA IF  
731 (799433). F.B. was supported by funds from the DFG (BO1961/5-2). D.H. was supported by  
732 grants from the Swedish research councils VR (2016-04562; 2020-05327) and FORMAS  
733 (2017-01596). T.O.B. was supported by BBSRC - Biotechnology and Biological Sciences  
734 Research Council, grant code BB/T006102/1. M.B.M. was supported by NSF IOS Grant  
735 2026368. FORMAS (grant number 2016-01044) for A.H. We thank the confocal microscopy  
736 facility of ZMBP that is supported by funds from DFG (INST 37/819-1 FUGG and INST  
737 37/965-1 FUGG), especially Sandra Richter and Natalie Krieger for their introduction into the  
738 Zeiss LSM880, Leica SP8 and FRET-FLIM.

739

## 740 **Material and Method**

741

### 742 **Plant Material and Growth Conditions**

743 Wild-type plants were *Arabidopsis thaliana* ecotype Columbia (Col-0) and *Nicotiana*  
744 *benthamiana*. *Arabidopsis* plants were grown on soil under short-day conditions (8/16-h  
745 light/dark cycles) in a growth chamber or for maintenance and crossings under long-day  
746 conditions (16/8-h light/ dark cycles) in a growth room with light intensity of 150  $\mu$ E, 21°C,  
747 and 70% relative humidity, respectively. *N. benthamiana* plants were grown under long day  
748 conditions 16/8-h light/dark cycles, 21°C, and 70% relative humidity.

749

### 750 **Plasmid construction**

751 For transient expression experiments, the coding region of XopL, AtSH3P2 or SlJoka2 were  
752 cloned into pENTR/D-TOPO and subsequently recombined into pUBN-DEST-GFP or RFP  
753 (Grefen *et al.*, 2010), pGWB614/5 (Nakagawa *et al.*, 2007), pMAlc2, pDEST15. The RFP-  
754 ATG8E/G, GFP-ATG8e, RFP-NBR1, RLUC-ATG8, RLUC-NBR1, XopD-GFP, XopJ-GFP,  
755 pTRV2-Joka2, pTRV2-ATG7 constructs were described previously (Üstün *et al.*, 2018, Üstün  
756 *et al.*, 2013). All binary plasmids were transformed into *Agrobacterium tumefaciens* strain  
757 C58C1 and infiltration of *N. benthamiana* was done at the four-to six-leaf stage. Stable  
758 *Arabidopsis* transformation was performed using the floral dip method (Clough & Bent, 1998).

759

### 760 **Transient Expression in *N. benthamiana* by *Agrobacterium*-Mediated Leaf Infiltration**

761 Transient expression was performed as described previously (Üstün *et al.*, 2018).

762

### 763 **Immunoprecipitation**

764 GFP pull-down assays were performed as previously described (Üstün *et al.*, 2018. Pulldown of  
765 ubiquitinated proteins was performed according to manufacturer's instructions (NanoTag  
766 Biotechnologies).

767

### 768 ***In vitro* pull-down**

769 *In vitro* pull-down was performed as previously described (Üstün *et al.*, 2013).

770

### 771 **Dual Luciferase Assay**

772 Dual luciferase assay was performed as described previously (Üstün *et al.*, 2018).

773

### 774 **Virus-induced gene silencing**

775 VIGS was performed as described previously (Üstün *et al.*, 2013).

776

### 777 **Bacterial growth conditions**

778 *Agrobacterium tumefaciens*, Agrobacteria strain C58C1 was grown in LB Hi-Salt (10g/L  
779 sodium chloride, 10g/L tryptone, 5g/L yeast extract) with 100 µg mL<sup>-1</sup> rifampicin at 28 °C.  
780 The cultures supplemented with the appropriate antibiotics for those harboring plasmids. Xcv  
781 strain 85-10 was grown in NYG media (0.5% peptone, 0.3% yeast extract, 2% glycerol) with  
782 100 µg mL<sup>-1</sup> rifampicin at 28 °C.

783

#### 784 **Construction of Xcv $\Delta xopL$ and $\Delta xopQ$ null mutants**

785 To construct Xcv 85-10 *xopL* and *xopQ* deletion mutants, the 1.7-kb upstream and downstream  
786 regions of the *xopL* or *xopQ* gene were PCR amplified using Xcv 85-10 genomic DNA as  
787 template and cloned into pLVC18 linearized with EcoRI (New England Biolabs) using Gibson  
788 assembly. The plasmid was introduced into Xcv 85-10 by triparental mating. Xcv  
789 transconjugants were analysed by PCR to confirm that homologous recombination occurred at  
790 the *xopL* or *XopQ* locus.

791

#### 792 **Constructs for Xcv $\Delta xopL$ complementation analysis**

793 To construct *xopL* gene with 0.3-kb promoter region in broad host range vector, 0.3-kb  
794 promoter-*xopL* gene was PCR amplified using Xcv 85-10 genomic DNA as template and  
795 cloned into pBBR1MCS-2 (Kovach *et al*, 1995) linearized with EcoRV (New England Biolabs)  
796 using Gibson assembly. The plasmid was introduced into Xcv 85-10  $\Delta xopL$  by triparental  
797 mating.

798

#### 799 **Bacterial infection**

800 Xcv carrying a deletion mutation of *XopQ* (Xcv  $\Delta xopQ$ ), or of *HrcN* (Xcv  $\Delta hrcN$ ), or of both  
801 *XopQ* and *XopL* (Xcv  $\Delta xopQ \Delta xopL$ ) were used to infect wild-type *N. benthamiana*. Xcv were  
802 grown overnight in NYG with appropriate antibiotics at 28°C with shaking. Bacteria were  
803 diluted to OD<sub>600</sub> = 0.2 for dual-luciferase assays, immunoblot analysis of NBR1, ATG8 or  
804 confocal microscopy of autophagosomal structures. For in planta growth curves using syringe  
805 infiltration, Xcv strains were inoculated at OD<sub>600</sub> = 0.0004, and for dip-inoculation OD<sub>600</sub> = 0.2  
806 was used.

807

#### 808 **Tomato growth condition and bacterial growth assay**

809 Tomato (*Solanum lycopersicum*) cv. VF36 was grown in greenhouse (22-28 °C, 50-70 % RH,  
810 16-h light). For bacterial growth assays, leaflets were dipped in a 2 x 10<sup>8</sup> CFU/mL suspension  
811 of Xcv 85-10 strains in 10mM MgCl<sub>2</sub> with 0.025% (v/v) silwet L-77 (Helena Chemical  
812 Company) for 30 sec. Plants were then placed in plastic chambers at high humidity (>95%) for  
813 24 h. For each strain analyzed, four leaf discs (0.5 cm<sup>2</sup>) per treatment per timepoint were ground  
814 in 10 mM MgCl<sub>2</sub> and diluted and spotted onto NYGA plates in triplicate to determine bacterial  
815 load. Three biological replicates (i.e., three plants) were used, and the experiment was repeated  
816 at least three times.

817

#### 818 **Confocal Microscopy**

819 Live-cell images were acquired from abaxial leaf epidermal cells using a Zeiss LSM780 and  
820 LSM880 microscope. Excitation/emission parameters for GFP and RFP were 488 nm/490 to  
821 552 nm and 561 nm/569 to 652 nm, respectively, and sequential scanning mode was used for  
822 colocalization of both fluorophores. Confocal images with ImageJ (version 2.00) software.  
823 Quantification of ATG8-labeled autophagosomal structures was done on z-stacks that were  
824 converted to eight-bit grayscale and then counted for ATG8 puncta either manually or by the  
825 Particle Analyzer function of ImageJ.

826

#### 827 **FRET-FLIM measurement**

828 FRET-FLIM was performed on SP8 confocal laser scanning microscope (CLSM) (Leica  
829 Microsystems GMBH) with LAS AF and SymPhoTime 64 software using a 63x/1.20 water  
830 immersion objective. FLIM measurements were performed with a 470 nm pulsed laser (LDH-  
831 P-C-470) with 40 MHz repetition rate and a reduced speed yielding, with an image resolution  
832 of 256x256, a pixel dwell time of ~10  $\mu$ s. Max count rate was set to ~15000 cps. Measurements  
833 were stopped, when the brightest pixel had a photon count of 1000. The corresponding emission  
834 was detected with a Leica HyD SMD detector from 500 nm to 530 nm by time-correlated single-  
835 photon counting using a Timeharp260 module (PicoQuant, Berlin). The calculation of GFP  
836 lifetime was performed by iterative reconvolution, i.e. the instrument response function was  
837 convolved with exponential test functions to minimize the error with regard to the original  
838 TCSPC histograms in an iterative process. For measurements of GFP-JOKA2 protein  
839 aggregates, ROIs were drawn manually on SymphoTime64 software around the aggregates to  
840 analyze GFP lifetime in these structures.

841

#### 842 **Immunoblot analysis**

843 Proteins were extracted in 100 mM Tris (pH 7.5) containing 2% SDS, boiled for 10min in SDS  
844 loading buffer, and cleared by centrifugation. The protein extracts were then separated by SDS-  
845 PAGE, transferred to PVDF membranes (Biorad), blocked with 5% skimmed milk in PBS, and  
846 incubated with primary antibodies anti-NBR1 (Agrisera), anti-ATG8 (Agrisera), anti-ubiquitin  
847 (Agrisera), anti-GFP (SantaCruz), anti-RFP (Chromotek), anti-HA (Sigma Aldrich) primary  
848 antibodies using 1:2000 dilutions in PBS containing 0.1% Tween 20. This was followed by  
849 incubation with horseradish peroxidase-conjugated secondary antibodies diluted 1:10,000 in  
850 PBS containing 0.1% Tween 20. The immunoreaction was developed using an ECL Prime Kit  
851 (GE Healthcare) and detected with Amersham Imager 680 blot and gel imager.

852

#### 853 ***In vitro* ubiquitination assay**

854 Recombinant proteins were expressed in *E. coli* BL21(DE3) and purified by affinity  
855 chromatography using amylose resin (New England Biolabs). Recombinant His-UBA1 and  
856 His-UBC8 were purified using Ni-Ted resin (Macherey-Nagel). Purified proteins were used for  
857 *in vitro* ubiquitination assays. Each reaction of 30 mL final volume contained 25 mM Tris-HCl,  
858 pH 7.5, 5 mM MgCl<sub>2</sub>, 50 mM KCl, 2 mM ATP, 0.6 mM DTT, 2  $\mu$ g ubiquitin, 200 ng E1 His-  
859 AtUBA1, 1.2  $\mu$ g E2 His-AtUBC8, 2  $\mu$ g of E3s, and 0.3  $\mu$ g of MBP-AtSH3P2. Samples were  
860 incubated for 1h at 30°C and reaction was stopped by adding SDS loading buffer and incubated  
861 for 10 min at 68°C. Samples were separated by SDS-PAGE electrophoresis using 4–15% Mini-  
862 PROTEAN® TGX™ Precast Protein Gels (BioRad) followed by detection of ubiquitinated  
863 substrate by immunoblotting using anti-MBP (New England Biolabs), anti-GST and anti-  
864 ubiquitin (Santa Cruz Biotechnology) antibodies.

865

#### 866 **NanoLC-MS/MS analysis and data processing**

867 Proteins were purified on a NuPAGE 12% gel (Invitrogen) and Coomassie-stained gel pieces  
868 were digested in gel with trypsin as described previously (Borchert *et al*, 2010) with a small  
869 modification: chloroacetamide was used instead of iodoacetamide for carbamidomethylation of  
870 cysteine residues to prevent formation of lysine modifications isobaric to two glycine residues  
871 left on ubiquitinated lysine after tryptic digestion. After desalting using C18 Stage tips peptide  
872 mixtures were run on an Easy-nLC 1200 system coupled to a Q Exactive HF-X mass  
873 spectrometer (both Thermo Fisher Scientific) as described elsewhere (Kliza *et al*, 2017) with  
874 slight modifications: the peptide mixtures were separated using a 87 minute segmented gradient  
875 from 10-33-50-90% of HPLC solvent B (80% acetonitrile in 0.1% formic acid) in HPLC solvent  
876 A (0.1% formic acid) at a flow rate of 200 nl/min. The seven most intense precursor ions were  
877 sequentially fragmented in each scan cycle using higher energy collisional dissociation (HCD)  
878 fragmentation. In all measurements, sequenced precursor masses were excluded from further

879 selection for 30 s. The target values were 105 charges for MS/MS fragmentation and 3x106  
880 charges for the MS scan.

881 Acquired MS spectra were processed with MaxQuant software package version 1.5.2.8 with  
882 integrated Andromeda search engine. Database search was performed against a *Nicotiana*  
883 *benthamiana* database containing 74,802 protein entries, the sequences of XopL from  
884 *Xanthomonas campestris* pv. *vesicatoria*, and 285 commonly observed contaminants.  
885 Endoprotease trypsin was defined as protease with a maximum of two missed cleavages.  
886 Oxidation of methionine, phosphorylation of serine, threonine and tyrosine, GlyGly dipetide on  
887 lysine residues, and N-terminal acetylation were specified as variable modifications.  
888 Carbamidomethylation on cysteine was set as fixed modification. Initial maximum allowed  
889 mass tolerance was set to 4.5 parts per million (ppm) for precursor ions and 20 ppm for fragment  
890 ions. Peptide, protein and modification site identifications were reported at a false discovery  
891 rate (FDR) of 0.01, estimated by the target-decoy approach (Elias and Gygi). The iBAQ  
892 (Intensity Based Absolute Quantification) and LFQ (Label-Free Quantification) algorithms  
893 were enabled, as was the “match between runs” option (Schwanhausser *et al*, 2011).

894

### 895 **RNA extraction and RT-qPCR**

896 RNA was extracted from 4 leaf discs according to manufacturer instructions using the  
897 GeneMATRIX Universal RNA Purification Kit (Roboklon) with on-column DNase I digestion.  
898 RNA integrity was checked by loading on 1% agarose gel and separating by electrophoresis.  
899 RNA concentrations were measured using Nanodrop 2000 (Thermo Fisher), and equal amounts  
900 of RNA were used for cDNA synthesis. cDNA synthesis was performed using LunaScript™  
901 RT SuperMix Kit (New England Biolabs) and in a standard thermocycler according to  
902 manufacturer instructions. Gene expression was measured by qPCR using MESA BLUE qPCR  
903 MasterMix Plus for SYBR® Assay No ROX (Eurogentec) and cycle quantification by Biorad  
904 CFX system.

905

### 906 **Drug treatments**

907 For the analysis of protein stability 200 µM MG132 or 1% EtOH was infiltrated to plants  
908 transiently expressing binary constructs 2dpi. 6 hours later leaf material was harvested. were  
909 analysed under the CLSM. Concanamycin A treatment was performed by syringe infiltration  
910 of mature leaves with 0.5 µM ConA for 6-8 h prior confocal analysis or immunoblot analysis.  
911 AZD8055 (15 µM) was done for 6-8 hours prior confocal microscopy.

912

### 913 **Phylogenetic Analysis**

914 An alignment between SH3P2 proteins was generated using ClustalW and the tree was  
915 generated using the neighbor-joining method. Effector proteins related to XopL were identified  
916 performing a BLASTp (<https://blast.ncbi.nlm.nih.gov/Blast.cgi>) using XopL protein sequence  
917 (ID: CAJ24951.1). 18 protein sequences were extracted from the Top100 sequences from Blast  
918 results with only the top hit considered per species/pathovars. Related effectors from more  
919 distant bacteria were identified realizing a second BLASTp excluding *Xanthomonas* genus and  
920 3 proteins from relevant species were extracted from the Top10 results. Protein from  
921 *Xanthomonas campestris* pv. *Campestris* was included manually as an example of non-  
922 conserved protein from *Xanthomonas* genus. Multiple Sequence Alignment of the 24 extracted  
923 sequences was performed using COBALT

924 (<https://www.ncbi.nlm.nih.gov/tools/cobalt/cobalt.cgi>) from NCBI.

925

### 926 **Data Analysis and Presentation**

927 Data are presented as boxplots with visible datapoints, where middle horizontal bars of boxplots  
928 represent the median, the bottom and top represent the 25th and 75th percentiles, whiskers  
929 extend to at most 1.5 times the interquartile range. Statistical significance was analysed using

930 appropriate statistical tests, either by Student's t test, one way ANOVA or Kruskal-Wallis rank  
931 sum test (\* $P < 0.05$ , \*\* $P < 0.01$ , and P\*\*\*  $< 0.001$ ). The number of biological replicates (n) is  
932 given in the figure legends. Statistical analyses and graphical presentation of data were made  
933 in R and RStudio (Version 1.2.5033). Boxplots were prepared using the ggplot2 package.

934

## 935 **Supporting information**

936

937 **Figure S1:** Silencing of *ATG7* in *N. benthamiana* plants abolishes autophagosome formation  
938 and Xcv blocks autophagy at 6hpi.

939 **Figure S2:** Virus induced gene silencing of *ATG7* in *N. benthamiana* is beneficial for Xcv.

940 **Figure S3:** Suppression of autophagy is enhanced by T3Es.

941 **Figure S4:** Screening for Xanthomonas T3Es with altered autophagic flux.

942 **Figure S5:** XopL contributes to Xcv virulence.

943 **Figure S6:** Joka2 bodies are induced during Xcv infection in a XopL-dependent manner.

944 **Figure S7:** Transgenic *A. thaliana* GFP-XopL plants display defects in autophagic degradation.

945 **Figure S8:** SH3P2 is conserved in different plant species.

946 **Figure S8:** XopL is ubiquitinated *in planta*.

947 **Supplemental Video 1:** XopL/SH3P2 puncta are mobile.

948 **Figure S9:** Silencing of SH3P2 in *N. benthamiana* perturbs autophagy.

949 **Figure S10:** Gene expression of SH3P2 is induced by XopL and XopL-mediated degradation  
950 is due to post-transcriptional degradation events.

951 **Figure S11:** RFP-XopL  $\Delta E3$  co-localizes with and is unable to ubiquitinate SH3P2-GFP.

952 **Figure S12:** XopL is degraded in the vacuole.

953 **Figure S13:** Virus-induced gene silencing of *Joka2* in *N. benthamiana* plants.

954 **Figure S14:** XopL in planta ubiquitination is enhanced by the presence of AIMp.

955 **Figure S15:** XopL is ubiquitinated *in planta* and undergoes self-ubiquitination.

956 **Figure S16:** Characterization of XopL<sub>K191A</sub> variant *in vitro* and *in planta*.

957 **Figure S17:** XopL  $\Delta E3$  is degraded by autophagy.

958 **Figure S18:** XopL K191 residue is highly conserved through the Xanthomonas genus

959 **Supplemental Table 1:** Primers used in manuscript.

960

## 961 **Author contributions**

962 J.X.L., S.Ü., M.R., D.S., G.L., A.R.G., J.-G.K., M.F.-W. performed the experiments. J.X.L.,  
963 M.R., G.L., E.A.M., M.F.W., B.M., A.H., T.O.B., M.B.M., F.B., D.H., and S.Ü. analysed the  
964 data. P.P. and T.O.B. provided novel material. S.Ü. planned the project and wrote the article  
965 together with J.X.L and input from all authors.

966

967

## 968 **Figure Legends**

969

### 970 **Figure 1: Xanthomonas blocks autophagy to enhance its pathogenicity**

971 **(A)** RFP-ATG8g-labeled autophagosomes were quantified from plants infected with mock or  
972 Xcv  $\Delta xopQ$  at 2 dpi in the presence or absence of ConA (bars = 20  $\mu\text{m}$ ). Puncta were calculated  
973 from z-stacks (15) of  $n=6$  individuals using ImageJ. Data points are plotted as open circles.  
974 Different letters indicate statistically significant differences ( $P < 0.05$ ) as determined by one-  
975 way ANOVA. The experiment was repeated twice with similar results.

976 **(B)** Immunoblot analysis of NBR1 and ATG8 protein levels in Xcv  $\Delta xopQ$  or mock infected *N.*  
977 *benthamiana* plants at 1 and 2dpi. Agrobacterium-mediated transient expression of AIMp-RFP



978 serves as a control for autophagy suppression. Ponceau Staining (PS) served as a loading  
979 control. The experiment was repeated three times with similar results.

980 (C) RLUC-ATG8a or RLUC-NBR1 constructs were coexpressed with internal control FLUC  
981 in *N. benthamiana*. *Xcv ΔxopQ* was co-infiltrated with Agrobacteria containing the luciferase  
982 reporter constructs. Coexpression of RFP-AIMP serves as a control for autophagy inhibition.  
983 Expression of the latter was confirmed with western blot (inset). *Renilla* (RLUC) and *Firefly*  
984 (FLUC) luciferase activities were simultaneously measured in leaf extracts at 48 h post-  
985 infiltration using the dual-luciferase system (n=4). Statistical significance (\*\*\* $P < 0.001$ ) was  
986 revealed by Student's *t*-test. The experiment was repeated more than 3 times with similar  
987 results.

988 (D) RT-qPCR analysis of *NbATG8-1.1/1.2*, *NbATG8-2.1/2.2* and *NbJoka2* transcript levels  
989 upon challenge of *N. benthamiana* plants with *Xcv ΔxopQ* for 1 and 2 dpi compared to mock  
990 infected plants. Values represent expression relative to mock control of respective time point  
991 and were normalized to *actin*. Statistical significance (\* $P < 0.05$ , \*\* $P < 0.01$ , \*\*\* $P < 0.001$ )  
992 was revealed by Student's *t*-test.

993 (E) Bacterial density in leaves of *N. benthamiana* infected with *Xcv* in the presence or absence  
994 autophagy suppressor AIMP-RFP. Leaves were syringe-infiltrated with  $OD_{600} = 0.0004$ , and  
995 colony-forming units were counted at 6 dpi. Compared to empty vector control (EV), AIMP  
996 expressing plants (n=6) harbour significantly more bacteria. Bacterial growth was repeated with  
997 the same result in 12 plants over two independent experiments. Red and yellow data points  
998 indicate independent repeats of the experiment. Statistical significance (\*\*\* $P < 0.001$ ) was  
999 revealed by Student's *t*-test. Expression of RFP-AIMP was verified at 6 dpi with an anti-RFP  
1000 blot (inset).

1001

## 1002 **Figure 2: Xanthomonas T3E XopL is suppressing autophagy**

1003 (A) RLUC-ATG8a or RLUC-NBR1 constructs were coexpressed with internal control FLUC  
1004 in *N. benthamiana*. XopL or GFP constructs were co-infiltrated. RLUC and FLUC signals were  
1005 simultaneously measured in leaf extracts at 48 h post- infiltration using the dual-luciferase  
1006 system. Values represent the ratio of RLUC-ATG8a and FLUC activities to the mean of control  
1007 (n=4) Statistical significance ( $P < 0.01$ ) was shown by Student's *t*-test. The experiment was  
1008 repeated more than 3 times by with similar results.

1009 (B) Immunoblot analysis of NBR1 and ATG8 protein levels in *N. benthamiana* plants  
1010 transiently expressing GFP-XopL or GFP control at 2dpi verified with an anti-GFP antibody.  
1011 Ponceau Staining (PS) served as a loading control. The experiment was repeated at least three  
1012 times with similar results.

1013 (C) Immunoblot analysis of NBR1 and ATG8 protein levels in *N. benthamiana* plants  
1014 transiently expressing XopL or GUS control at 2dpi after ConA or DMSO treatment.  
1015 Expression of GFP-XopL was verified with an anti-GFP antibody, while expression of GUS-  
1016 HA was confirmed with an anti-HA antibody. Ponceau Staining (PS) served as a loading  
1017 control. The experiment was repeated twice with similar results.

1018 (D) GFP-ATG8g-labeled autophagosomes were quantified from plants infected with *Xcv*  
1019 *ΔxopQ* or *Xcv ΔxopQ ΔxopL* at 2 dpi in the presence or absence of ConA. Puncta were calculated  
1020 from z-stacks (15) of  $n=12$  individuals using ImageJ. Statistical significance (\*\* $P < 0.01$ , \*\*\*  
1021  $P < 0.001$ ) was determined by one way ANOVA. The experiment was repeated twice with  
1022 similar results.

1023 (E) Immunoblot analysis of NBR1 and ATG8 protein levels in *Xcv ΔxopQ*, *Xcv ΔxopQ ΔxopL*  
1024 or mock infected *N. benthamiana* plants at 2dpi. Ponceau Staining (PS) served as a loading  
1025 control. The experiment was repeated twice with similar results.

1026 (F) RLUC-ATG8a or RLUC-NBR1 constructs were coexpressed with internal control FLUC  
1027 in *N. benthamiana*. *Xcv ΔxopQ* and *Xcv ΔxopQ ΔxopL* were co-infiltrated with Agrobacteria  
1028 containing the respective constructs. RLUC and FLUC activities were simultaneously measured

1029 in leaf extracts at 48 h post- infiltration using the dual-luciferase system. Values represent the  
1030 ratio of RLUC-ATG8a and FLUC activities and error bars show SD (n=4). Statistical  
1031 significance comparing *Xcv ΔxopQ* and *Xcv ΔxopQ ΔxopL* values (\*\*\*)  $P < 0.001$  was revealed  
1032 by Student's *t*-test. The experiment was repeated 3 times with similar results.  
1033

### 1034 **Figure 3: XopL interacts with and degrades SH3P2 and to boost *Xcv* virulence**

1035 **(A)** Interaction of XopL with SH3P2 in yeast two-hybrid assays. XopL fused to the GAL4  
1036 DNA-binding domain was expressed in combination with SH3P2 fused to the GAL4 activation  
1037 domain (AD) in yeast strain Y190. Cells were grown on selective media before a LacZ filter  
1038 assay was performed. pSV40/p53 served as positive control, while the empty AD or BD vector  
1039 served as negative control. NtSH3P2 = *Nicotiana tabacum* SH3P2. –LT = yeast growth on  
1040 medium without Leu and Trp, –HLT = yeast growth on medium lacking His, Leu, and Trp,  
1041 indicating expression of the HIS3 reporter gene. LacZ, activity of the lacZ reporter gene.

1042 **(B)** Coimmunoprecipitation of GFP-XopL with AtSH3P2-HA. GFP-XopL or GFP were  
1043 transiently coexpressed with AtSH3P2-HA in leaves of *N. benthamiana*. After 48 h, total  
1044 proteins (Input) were subjected to immunoprecipitation (IP) with GFP-Trap beads, followed by  
1045 immunoblot analysis using either anti-GFP or anti-HA antibodies. AtSH3P2 = *Arabidopsis*  
1046 *thaliana* SH3P2. Two repetitions with similar results have been conducted.

1047 **(C)** Visualization of protein interactions *in planta* by the bimolecular fluorescence  
1048 complementation assay. Yellow fluorescent protein (YFP) confocal microscopy images show  
1049 *Nicotiana benthamiana* leaf epidermal cells transiently expressing Venus<sup>N173</sup>-XopL in  
1050 combination with AtSH3P2-Venus<sup>C155</sup>. A positive control showing the dimerization of  
1051 fructose-1,6-bisphosphatase (FBPase) within the cytosol. The red structures indicate  
1052 autofluorescence of chloroplasts. The combination of Venus<sup>N173</sup>-XopL with FBPase-Venus<sup>C155</sup>  
1053 or Venus<sup>N173</sup>-FBPase with AtSH3P2-Venus<sup>C155</sup> do not induce YFP fluorescence and serve as  
1054 negative controls. Bars = 20 μm.

1055 **(D)** Colocalization analysis of GFP-XopL with SH3P2-RFP, RFP-ATG8e and RFP-ATG8g in  
1056 *N. benthamiana* leaves. Imaging was performed 2 d after transient expression and images  
1057 represent single confocal planes from abaxial epidermal cells (scale bars = 20 μm and 10 μm,  
1058 lower panel). White arrows indicate colocalization of GFP and RFP signals. The experiment  
1059 was repeated twice with similar results.

1060 **(E)** Total proteins were extracted 48 hpi with *A. tumefaciens* harboring the respective GFP-  
1061 XopL, HA-XopL and SH3P2-GFP expression constructs. SH3P2-GFP protein levels (lower  
1062 band) were detected using an anti-GFP antibody. Expression of the XopL was verified using an  
1063 anti-HA or anti-GFP antibody. Expression of GUS-HA served as a control. Ponceau S staining  
1064 serves as a loading control. The experiment was repeated three times with similar results.

1065 **(F)** Growth of *Xcv* and *Xcv ΔxopL* strains in *roq1 N. benthamiana* plants silenced for SH3P2  
1066 (pTRV2-*SH3P2*) compared to control plants (pTRV2). Leaves were dip-inoculated with a  
1067 bacteria suspension at OD<sub>600</sub> = 0.2 and bacteria were quantified at 3 and 6 dpi. Red and yellow  
1068 data points indicate experimental repeats. Different letters indicate statistically significant  
1069 differences ( $P < 0.05$ ) as determined by one-way ANOVA.

1070

### 1071 **Figure 4. XopL mediates the proteasome degradation of SH3P2 via its E3 ligase activity**

1072 **(A)** SH3P2-GFP was transiently coexpressed together with GUS-HA and GFP-XopL in *N.*  
1073 *benthamiana* using agroinfiltration. At 42 hpi, 200 μM MG132 was infiltrated into *A.*  
1074 *tumefaciens*-inoculated leaves, and leaf material was collected 48 hpi. Expression of SH3P2-  
1075 GFP (lower band) and GFP-XopL (upper band) was detected using an anti-GFP antibody. GUS-  
1076 HA expression was confirmed with an anti-HA antibody. Ponceau S staining serves as a loading  
1077 control. The experiment was repeated three times with similar results.

1078 **(B)** *In vitro* ubiquitination assay reveals ubiquitination of SH3P2 by XopL. GST-XopL, and  
1079 MBP-SH3P2 were tested using the Arabidopsis His-AtUBA1 and His-AtUBC8. Lanes 2 to 4

1080 are negative controls. Proteins were separated by SDS-PAGE and detected by immunoblotting  
1081 using the indicated antibodies. The experiment was repeated twice with similar results.  
1082 (C) SH3P2-GFP was transiently coexpressed together with GFP, GFP-XopL and GFP-XopL  
1083  $\Delta$ E3 in *N. benthamiana* using agroinfiltration. GFP protein levels were detected with an anti-  
1084 GFP antibody. Ponceau S staining serves as a loading control. The experiment was repeated  
1085 three times with similar results.  
1086 (D) Immunoblot analysis of ATG8 protein levels in *N. benthamiana* plants transiently  
1087 expressing GFP-XopL, GFP-XopL  $\Delta$ E3 or GFP control at 2dpi. Expression of binary constructs  
1088 was verified with an anti-GFP antibody. Ponceau Staining (PS) served as a loading control. The  
1089 experiment was repeated twice with similar results.  
1090 (E) RLUC-ATG8a constructs were coexpressed with internal control FLUC in *N. benthamiana*.  
1091 GFP-XopL, GFP-XopL  $\Delta$ E3 or GFP control were co-infiltrated together with RLUC/FLUC  
1092 mixture. *Renilla* and *Firefly* luciferase activities were simultaneously measured in leaf extracts  
1093 at 48 hpi using the dual-luciferase system. Values represent the ratio of RLUC-ATG8a and  
1094 FLUC activities (n=4). Statistical significance (\*  $P < 0.5$ , \*\*  $P < 0.01$ ) was revealed by  
1095 Student's *t*-test. The experiment was repeated 3 times. Expression of proteins was verified with  
1096 indicated antibodies.

1097  
1098 **Figure 5: XopL is ubiquitinated in planta and degraded by NBR1-mediated selective**  
1099 **autophagy**

1100 (A) GFP-XopL was coexpressed with GFP or AIMp-RFP. Proteins were separated by SDS-  
1101 PAGE and detected by immunoblotting using the indicated antibodies. Ponceau Staining (PS)  
1102 served as a loading control. The experiment was repeated three times with similar results.

1103 (B) Colocalization of GFP-XopL with RFP-Joka2 in *N. benthamiana* leaves. Imaging was  
1104 performed 2 d after transient expression and images represent single confocal planes from  
1105 abaxial epidermal cells (bars = 20  $\mu$ m). The experiment was repeated twice with similar results.

1106 (C) FRET FLIM measurements of GFP-Joka2 and RFP-XopL in *N. benthamiana* leaves. The  
1107 freeRFP construct served as a negative control and RFP-ATG8E (n = 9) as a positive control.  
1108 Scattered points show individual data points, color indicates biological repeats. The lifetime (in  
1109 ns) of GFP-Joka2 (donor, n = 41) was significantly reduced in the presence of RFP-XopL (n =  
1110 40) but not in the presence of freeRFP (n = 35). Significant differences were calculated using  
1111 Wilcoxon rank sum test, with significantly different groups denoted by different letters. The  
1112 experiment was repeated three times with similar results.

1113 (D) Immunoprecipitation (IP) of GFP-XopL reveals association with NBR1. Immunoblots of  
1114 input and IP samples from *N. benthamiana* plants transiently expressing GFP or GFP-XopL  
1115 were probed with anti-GFP and anti-NBR1 antibodies.

1116 (E) Immunoprecipitation (IP) of GFP-XopL and GFP-XopL  $\Delta$ E3 reveals association with  
1117 NBR1. Immunoblots of input and IP samples from *N. benthamiana* plants transiently  
1118 expressing GFP, GFP-XopL and GFP-XopL  $\Delta$ E3 were probed with anti-GFP and anti-NBR1  
1119 antibodies.

1120 (F) GFP-XopL was transiently expressed in pTRV2, pTRV2-Joka2 and *N. benthamiana* WT  
1121 plants. Expression of binary constructs was verified with an anti-GFP antibody. Joka2 silencing  
1122 was verified using an anti-NBR1 antibody. Ponceau Staining (PS) served as a loading control.  
1123 The experiment was repeated twice with similar results.

1124 (G) Growth of *Xcv*  $\Delta$ xopQ in *N. benthamiana* plants silenced for *Joka2* (pTRV2-Joka2)  
1125 compared to control plants (pTRV2). Leaves were dip-inoculated with a bacteria suspension at  
1126 OD<sub>600</sub> = 0.2. and bacteria were quantified at 3 and 6 dpi. Red, blue, and green data points  
1127 represent repeats of the experiments. Significant differences were calculated using Student's *t*-  
1128 test and are indicated by: \*\*,  $P < 0.01$ . The experiment was repeated three times with similar  
1129 trends.

1130 **(H)** GFP-XopL, GFP-XopL  $\Delta E3$  were transiently expressed in *N. benthamiana*. AIMp-RFP  
1131 was co-infiltrated to stabilize both XopL variants. Samples were taken 48 hpi, and total proteins  
1132 (Input) were subjected to immunoprecipitation (IP) with GFP-Trap beads, followed by  
1133 immunoblot analysis of the precipitates using either anti-GFP or anti-ubiquitin antibodies. GFP  
1134 served as a negative control. RFP-AIMp expression was verified by an anti-RFP antibody. The  
1135 experiment was repeated three times with similar results.

1136 **(I)** GFP-XopL was transiently expressed in *N. benthamiana*. Samples were taken 48 hpi, and  
1137 total proteins (Input) were subjected to immunoprecipitation (IP) with the ubiquitin pan  
1138 selector, followed by immunoblot analysis of the precipitates using either anti-GFP or anti-  
1139 ubiquitin antibodies. GFP served as a control. Asterisk indicates the GFP-XopL full-length  
1140 protein. The experiment was repeated two times with similar results.

1141 **(J)** Immunoblot analysis GFP-XopL and GFP-XopL<sub>K191A</sub> at 1 and 2 dpi using an anti-GFP  
1142 antibody. Ponceau Staining (PS) served as a loading control. The experiment was repeated three  
1143 times with similar results.

1144 **(K)** GFP-XopL and GFP-XopL<sub>K191A</sub> were transiently expressed in *N. benthamiana*. Samples  
1145 were taken 48 hpi, and total proteins (Input) were subjected to immunoprecipitation (IP) with  
1146 GFP-Trap beads, followed by immunoblot analysis of the precipitates using either anti-GFP,  
1147 anti-ubiquitin and anti-NBR1 antibodies. GFP served as a control. The experiment was repeated  
1148 three times with similar results.

1149

#### 1150 **Figure 6: Model illustrating the function of XopL**

1151 **(A) Xenophagy of XopL:** Upon delivery of XopL in the plant XopL undergoes self-  
1152 ubiquitination and possible ubiquitination by an unknown host E3 ligase. Joka2/NBR1  
1153 associates with XopL and triggers its degradation via the selective autophagy pathway in the  
1154 vacuole. **(B) XopL blocks autophagy:** XopL interacts with autophagy component SH3P2  
1155 inside the cell and ubiquitinates it to degrade it via the 26S proteasome. Degradation of SH3P2  
1156 results in defects of autophagosome delivery into the vacuole and hence suppresses autophagy.

1157

1158 **Fig. S1: Silencing of ATG7 in *N. benthamiana* plants abolishes autophagosome formation**  
1159 **and Xcv blocks autophagy at 6hpi.** GFP-ATG8e-labeled puncta were quantified from plants  
1160 silenced for *ATG7* (pTRV2-*ATG7*) infected with mock or *Xcv*  $\Delta xopQ$  at 6hpi in the presence  
1161 or absence of ConA, and of AZD. Puncta were calculated from z-stacks (X) of  $n=12$  individuals  
1162 using ImageJ. Different letters indicate statistically significant different groups ( $P < 0.05$ ) as  
1163 determined by one way ANOVA.

1164 **(B)** RLUC-ATG8a or RLUC-NBR1 constructs were coexpressed with internal control FLUC  
1165 in *N. benthamiana*. *Xcv*  $\Delta xopQ$  or infiltration buffer (mock) was co-infiltrated with  
1166 Agrobacteria containing the respective constructs. RLUC and FLUC activities were  
1167 simultaneously measured in leaf extracts at 8 h post- infiltration using the dual-luciferase  
1168 system. Values represent the mean ratio of RLUC-ATG8a and FLUC activities ( $n=4$ ).  
1169 Statistical significance ( $***P < 0.001$ ) was revealed by Student's *t*-test. The experiment was  
1170 repeated 3 times with similar results.

1171

#### 1172 **Fig. S2: Virus induced gene silencing of ATG7 in *N. benthamiana* is beneficial for Xcv.**

1173 **(A)** Growth of *Xcv*  $\Delta xopQ$  in *N. benthamiana* plants silenced for *ATG7* (pTRV2-*ATG7*)  
1174 compared to control plants (pTRV2). Leaves were dip-inoculated with a bacteria suspension at  
1175  $OD_{600} = 0.2$  and bacteria were quantified at 6 dpi. Data represent the mean SD ( $n = 6$ ).  
1176 Significant differences were calculated using Student's *t*-test and are indicated by \*\*,  $P < 0.01$ .  
1177 The experiment was repeated twice with similar trends. Red and yellow data points represent  
1178 repeats of the experiment.

1179 **(B)** qRT-PCR analysis of *ATG7* mRNA levels in silenced *N. benthamiana* plants. *Actin*  
1180 expression was used to normalize the expression value in each sample, and relative expression  
1181 values were determined against the mean expression in pTRV2 (control) plants.  
1182

1183 **Fig. S3: Suppression of autophagy is enhanced by T3Es.**

1184 **(A)** Immunoblot analysis of NBR1 and ATG8 protein levels in *Xcv*  $\Delta xopQ$ ,  $\Delta hrcN$  or mock  
1185 infected *N. benthamiana* plants at 1 and 2 dpi. Ponceau Staining (PS) served as a loading control.  
1186 The experiment was repeated twice with similar results.

1187 **(B)** Autophagic flux determined by quantitative dual-luciferase assay. RLUC-ATG8a or  
1188 RLUC-NBR1 constructs were coexpressed with internal control FLUC in *N. benthamiana*. *Xcv*  
1189  $\Delta xopQ$  and  $\Delta hrcN$  were respectively co-infiltrated with Agrobacteria containing the luciferase  
1190 constructs. Renilla and Firefly luciferase activities were simultaneously measured in leaf  
1191 extracts at 48 h post- infiltration using the dual-luciferase system. Values represent the ratio of  
1192 RLUC-ATG8a and FLUC activities normalized to mock (n=4). Statistical significance  
1193 (\*\* $P < 0.01$ ) was revealed by Student's *t*-test. The experiment was repeated 2 times with similar  
1194 results.

1195 **(C)** RT-qPCR analysis of *NbATG8-1.1/1.2* and *NbJoka2* transcript levels upon challenge of *N.*  
1196 *benthamiana* plants with *Xcv*  $\Delta xopQ$  and  $\Delta hrcN$  for 1 and 2 dpi compared to mock infected  
1197 plants. Values represent expression relative to mock control of respective time point and were  
1198 normalized to *actin*. Statistical significance (\*\* $P < 0.001$ ) was revealed by Student's *t*-test.  
1199

1200 **Fig. S4: Screening for Xanthomonas T3Es with altered autophagic flux.**

1201 **(A)** RLUC-ATG8a constructs were coexpressed with internal control FLUC in *N. benthamiana*.  
1202 GFP-XopL, XopJ-GFP, XopD-GFP and XopS-HA were co-infiltrated with Agrobacteria  
1203 carrying the RLUC-ATG8a and FLUC constructs. Renilla and Firefly luciferase activities were  
1204 simultaneously measured in leaf extracts at 48 h post- infiltration using the dual-luciferase  
1205 system. Values represent the ratio of RLUC-ATG8a to FLUC activity normalized to GFP  
1206 control (XopL, XopJ, XopD, AIMp; n=20; XopS n=4). Expression of T3Es and RFP-AIMp  
1207 were verified with the indicated antibodies.

1208 **(B)** RLUC-ATG8a constructs were coexpressed with internal control FLUC in *N. benthamiana*.  
1209 Plants were treated with MG132 for 6 hours prior measurement. Values represent the ratio of  
1210 RLUC-ATG8a to FLUC activity normalized to vector control (n=8). Statistical significance (\*  
1211  $P < 0.5$ ) was revealed by Student's *t*-test.

1212 **(C)** RT-qPCR analysis of *NbATG8-2.1/2.2* and *NbJoka2* transcript levels upon Agrobacteria-  
1213 mediated transient expression of GFP, GFP-XopL or AIMp for 1 and 2 dpi. Values represent  
1214 expression relative to GFP control of respective time point and were normalized to *actin*.  
1215 Statistical significantly different groups are denoted by different letters, as calculated using  
1216 Kruskal-Wallis rank sum test ( $P < 0.05$ ).  
1217

1218 **Fig. S5: XopL contributes to Xcv virulence.**

1219 **(A)** Growth of *Xcv* 85-10 (vector) (white bar), *Xcv* 85-10  $\Delta xopL$  (vector) (grey bar), and *Xcv*  
1220 85-10  $\Delta xopL$  (*xopL*) (black bar) strains in tomato VF36 leaves. Leaves were dipped in a  $2 \times 10^8$   
1221 CFU/mL suspension of bacteria. The number of bacteria in each leaf was quantified at 10 dpi.  
1222 Data points represent mean  $\log_{10}$  colony-forming units per  $\text{cm}^2 \pm \text{SD}$  of three plants. Different  
1223 letters above bars indicate statistically significant (Tukey's honestly significant difference  
1224 (HSD) test,  $P < 0.05$ ) differences between samples. Vector = pBBR1MCS-2.

1225 **(B)** Delayed disease symptom development in tomato leaves inoculated with *Xcv* or *Xcv*  $\Delta xopL$ .  
1226 Tomato leaves inoculated with strains described in (A) were photographed at 14 dpi.

1227 **(C)** Growth of *Xcv* 85-10, *Xcv* 85-10  $\Delta xopL$  strains in *roq1 N. benthamiana* leaves. Leaves  
1228 were dipped in a  $2 \times 10^8$  CFU/mL suspension of bacteria. The number of bacteria in each leaf

1229 was quantified at 10 dpi (n = 5). Significant differences were calculated using Student's *t*-test  
1230 (\*\*, P < 0.01). The experiment was repeated twice with similar trends.

1231 **(D)** Delayed disease symptom development in *roq1 N. benthamiana* leaves dip-inoculated with  
1232 *Xcv* or *Xcv ΔxopL*. *N. benthamiana roq1* leaves inoculated with strains described in (C) were  
1233 photographed at 10 dpi.

1234 **(E)** Delayed symptom development in *roq1 N. benthamiana* leaves inoculated with *Xcv* or *Xcv*  
1235 *ΔxopL*. Leaves were syringe-inoculated with OD<sub>600</sub>=0.2 and photographed at 3 dpi.

1236

1237 **Fig. S6: Joka2 bodies are induced during Xcv infection in a XopL-dependent manner.**

1238 **(A)** GFP-ATG8e-labeled autophagosomes imaged from *N. benthamiana* plants infected with  
1239 mock, *Xcv* or *Xcv ΔxopL* at 2 dpi in the presence or absence of ConA (bars = 10 μm).

1240 **(B)** Joka2-RFP labelled puncta or aggregates upon challenge of *N. benthamiana* leaves with  
1241 mock, *Xcv* or *Xcv ΔxopL* infection at 1dpi.

1242

1243 **Fig. S7: Transgenic A. thaliana GFP-XopL plants display defects in autophagic**  
1244 **degradation**

1245 **(A)** Immunoblot analysis of NBR1 protein levels in transgenic UBQ::GFP-XopL plants or Col-  
1246 0. Plants were treated with concanamycin A (ConA) for 6 hours. Expression of GFP-XopL was  
1247 verified with an anti-GFP antibody. Ponceau S staining serves as a loading control.

1248 **(B)** 5 weeks old *A. thaliana* plants expressing UBQ::GFP-XopL develop an early senescence  
1249 phenotype reminiscent of autophagy deficient mutants.

1250 **(C)** Localization analysis of GFP-XopL of transgenic *A. thaliana* UBQ::GFP-XopL #23 line.  
1251 Image represents single confocal planes from abaxial epidermal cells (bars = 5 μm).

1252 **(D)** RT-qPCR analysis of *ATG8a* and *NBR1* transcript levels in *Arabidopsis thaliana* GFP or  
1253 GFP-XopL plants. Values represent expression (n=3) relative to GFP control and were  
1254 normalized to *PP2A*. Statistical significance (\*P<0.05) was revealed by Student's *t*-test.

1255

1256 **Fig. S8: SH3P2 is conserved in different plant species.**

1257 **(A)** Protein sequence alignment of SH3P2 from different species. The alignment was generated  
1258 using CLUSTALW2 with default parameters and BoxShade 3.21. Positions of identical and  
1259 similar sequences are boxed in black and grey, respectively. The following sequences were used  
1260 to build the alignment: *Arabidopsis thaliana*, *Nicotiana tabacum*, *Nicotiana benthamiana*,  
1261 *Solanum lycopersicum*.

1262 **(B)** Phylogenetic analysis of the SH3P2 from different plant species.

1263 **(C)** XopL interacts with SH3P2 from *Nicotiana tabacum* and *Nicotiana benthamiana*.  
1264 Interaction of XopL with SH3P2 in yeast two-hybrid assays. XopL fused to the GAL4 DNA-  
1265 binding domain was expressed in combination with SH3P2 fused to the GAL4 activation  
1266 domain (AD) in yeast strain Y190. Cells were grown on selective media before a LacZ filter  
1267 assay was performed. The empty AD or BD vector served as negative control. NtSH3P2 =  
1268 *Nicotiana tabacum* SH3P2, NbSH3P2 = *Nicotiana benthamiana* –LT = yeast growth on  
1269 medium without Leu and Trp, –HLT = yeast growth on medium lacking His, Leu, and Trp,  
1270 indicating expression of the HIS3 reporter gene. LacZ, activity of the lacZ reporter gene.

1271 **(D)** *In vitro* co-IP assay showing direct interaction of XopL with AtSH3P2. MBP-XopL and  
1272 GST-AtSH3P2 were expressed in *E. coli*. Pull down was performed using amylose resin.  
1273 Proteins were detected in an immunoblot using antibodies as indicated.

1274

1275 **Supp Video 1: XopL/SH3P2 puncta are mobile**

1276 *Nicotiana benthamiana* leaf epidermal cells transiently expressing Venus<sup>N173</sup>-XopL in  
1277 combination with AtSH3P2-Venus<sup>C155</sup>.

1278

1279 **Fig. S9: Silencing of SH3P2 in *N. benthamiana* perturbs autophagy.**  
1280 (A) qRT-PCR analysis of SH3P2 mRNA levels in silenced plants. *Actin* expression was used  
1281 to normalize the expression value in each sample, and relative expression values were  
1282 determined against pTRV2 control plants (set to 1).  
1283 (B) Phenotype of SH3P2-VIGS plants in comparison to the pTRV2 control. Picture was taken  
1284 14 dpi.  
1285 (C) Immunoblot analysis of ATG8 protein levels in *N. benthamiana* pTRV2 (control) and  
1286 pTRV2-*SH3P2* (*SH3P2* silencing) 2 weeks after VIGS. Ponceau Staining (PS) served as a  
1287 loading control. The experiment was repeated twice with similar results.  
1288 (D) GFP-ATG8e-labeled autophagosomes were quantified from pTRV2 or pTRV2-*SH3P2*  
1289 plants transiently expressing GFP-ATG8e at 2dpi in the presence of autophagy inducer AZD =  
1290 AZD8055 and AZD/ConA. Puncta were calculated from z-stacks of  $n=10$  individuals using  
1291 ImageJ. Statistical significance (\*\*\*)  $P < 0.5$ ) was revealed by Student's *t*-test comparing  
1292 number of autophagosomes in AZD/ConA treatments in pTRV2 and pTRV2-*SH3P2* plants.  
1293 The experiment was repeated twice with similar results.

1294  
1295 **Fig. S10: Gene expression of SH3P2 is induced by XopL and XopL-mediated degradation**  
1296 **is due to post-transcriptional degradation events.**  
1297 qRT-PCR analysis of AtSH3P2-specific mRNA levels in *N. benthamiana* plants transiently  
1298 expressing AtSH3P2-HA, upon coexpression with GFP or GFP-XopL. *Actin* expression was  
1299 used to normalize the expression value in each sample. Values represent AtSH3P2 transcript  
1300 level normalized to control ( $n=4$ ).

1301  
1302 **Fig. S11: RFP-XopL  $\Delta E3$  co-localizes with and is unable to ubiquitinate SH3P2-GFP.**  
1303 (A) Colocalization analysis of RFP-XopL  $\Delta E3$  with SH3P2-GFP in *N. benthamiana* leaves.  
1304 Imaging was performed 2 d after transient expression and images represent single confocal  
1305 planes from abaxial epidermal cells (bars = 20  $\mu\text{m}$ ).  
1306 (B) *In vitro* ubiquitination assay reveals GST-XopL  $\Delta E3$  is unable to ubiquitinate MBP-SH3P2.  
1307 GST-XopL,  $\Delta E3$  and MBP-SH3P2 were tested using the Arabidopsis His-AtUBA1 and His-  
1308 AtUBC8. Lanes 2 to 4 are negative controls, while Lane 5 is the positive control with GST-  
1309 XopL. Proteins were separated by SDS-PAGE and detected by immunoblotting using the  
1310 indicated antibodies. The experiment was repeated three times with similar results.

1311  
1312 **Fig. S12 XopL is degraded in the vacuole.** Localization of GFP-XopL in the presence or  
1313 absence of ConA in transgenic GFP-XopL. DMSO or 0.5  $\mu\text{M}$  ConA was used to treat seedlings,  
1314 followed by confocal imaging of the roots. GFP-labeled puncta detectable upon ConA treatment  
1315 indicate XopL accumulation in the vacuole (bars = 20  $\mu\text{m}$ ).

1316  
1317 **Fig. S13: Virus-induced gene silencing of *Joka2* in *N. benthamiana* plants.**  
1318 (A) qRT-PCR analysis of *Joka2* mRNA levels in *Joka2* silenced pepper plants. *Actin* expression  
1319 was used to normalize the expression value in each sample, and relative expression values were  
1320 determined against pTRV2 control plants (set to 1).  
1321 (B) Immunoblot analysis of GFP and GFP-XopL protein levels in *N. benthamiana* plants  
1322 silenced for *Joka2* (pTRV2-*Joka2*) compared against control (pTRV2). Ponceau staining (PS)  
1323 served as a loading control.

1324  
1325 **Fig. S14: XopL in planta ubiquitination is enhanced by the presence of AIMp** GFP-XopL  
1326 or GFP were transiently expressed in *N. benthamiana*. RFP-AIMp was co-infiltrated. Samples  
1327 were taken 48 hpi, and total proteins (Input) were subjected to immunoprecipitation (IP) with  
1328 the ubiquitin pan selector, followed by immunoblot analysis of the precipitates using either anti-  
1329 GFP or anti-ubiquitin antibodies. RFP-AIMp expression was verified by an anti-RFP antibody.

1330 Asterisk indicates the GFP-XopL full-length protein. The experiment was repeated twice with  
1331 similar results.

1332

1333 **Fig. S15: XopL is ubiquitinated *in planta* and undergoes self-ubiquitination**

1334 (A) XopL ubiquitination site at lysine 191 was identified *in vivo* by LC-MS/MS. GFP-XopL  
1335 was transiently expressed in *N. benthamiana* and total proteins were subjected to anti-GFP IP  
1336 followed by trypsin digestion. Ubiquitinated peptides were detected by LC-MS/MS. The  
1337 spectrum shows the fragmentation pattern of the GlyGly modified peptide  
1338 ALgIKATADLLEDATQPGR corresponding to amino acids 189-205.

1339 (B) *In vitro* ubiquitination assay reveals autoubiquitination of XopL. Ubiquitination of MBP-  
1340 XopL was tested using the Arabidopsis His-AtUBA1 and His-AtUBC8. Lanes 2 to 4 are  
1341 negative controls. Proteins were separated by SDS-PAGE and detected by immunoblotting  
1342 using the indicated antibodies. Arrows in the MBP blot indicate higher molecular weight bands  
1343 of MBP-XopL and autoubiquitination events. The experiment was repeated twice with similar  
1344 results.

1345 (C) XopL ubiquitination site at lysine 191 was identified *in vitro* by LC-MS/MS. GST-XopL  
1346 was used in an *in vitro* ubiquitination assay and samples were subjected to trypsin digestion.  
1347 Ubiquitinated peptides were detected by LC-MS/MS. The spectrum shows the fragmentation  
1348 pattern of the GlyGly modified peptide ALgIKATADLLEDATQPGR corresponding to amino  
1349 acids 189-205.

1350

1351 **Fig. S16: C Characterization of XopL<sub>K191A</sub> variant *in vitro* and *in planta*.**

1352 (A) *In vitro* ubiquitination assay reveals less autoubiquitination of XopL K191A compared to  
1353 XopL WT. Ubiquitination of GST-XopL was tested using the Arabidopsis His-AtUBA1 and  
1354 His-AtUBC8. Lanes 3 to 5 are negative controls. Proteins were separated by SDS-PAGE and  
1355 detected by immunoblotting using the indicated antibodies. The experiment was repeated twice  
1356 with similar results.

1357 (B) Localization analysis of GFP-XopL<sub>K191A</sub> in *N. benthamiana* leaves. Imaging was performed  
1358 2 d after transient expression and images represent single confocal planes from abaxial  
1359 epidermal cells (bars = 20  $\mu$ m).

1360 (C) qRT-PCR analysis of GFP-XopL and GFP-XopL K191A mRNA levels in *N. benthamiana*  
1361 plants during transient expression. *Actin* expression was used to normalize the expression value  
1362 in each sample.

1363 (D) GFP-XopL and GFP-XopL<sub>K191A</sub> were transiently expressed in *N. benthamiana*. RFP-AIMp  
1364 was co-infiltrated. Samples were taken 48 hpi, and total proteins (Input) were subjected to  
1365 immunoprecipitation (IP) with the ubiquitin pan selector, followed by immunoblot analysis of  
1366 the precipitates using either anti-GFP or anti-ubiquitin antibodies. GFP served as a control.  
1367 RFP-AIMp expression was verified by an anti-RFP antibody. Asterisk indicates the GFP-XopL  
1368 full-length protein. The experiment was repeated twice with similar results.

1369

1370 **Fig. S17: XopL  $\Delta$ E3 is degraded by autophagy.**

1371 (A) GFP, GFP-XopL, or GFP-XopL  $\Delta$ E3 was coexpressed with RFP-AIMp or RFP control in  
1372 *N. benthamiana*. Samples were taken at 2 dpi, total proteins extracted and immunoblotted using  
1373 the indicated antibodies. Ponceau Staining (PS) served as a loading control.

1374 (B) Immunoblot of transiently expressed GFP-XopL  $\Delta$ E3 in *N. benthamiana* after treatment of  
1375 ConA or DMSO carrier. Ponceau Staining (PS) served as a loading control.

1376

1377 **Fig. S18: XopL K191 residue is highly conserved through the Xanthomonas genus**

1378 (A) Sequence alignment of XopL protein from *Xcv* with related effectors from *Xanthomonas*  
1379 genus or more distantly related plant pathogen bacteria. Colors represent amino acid  
1380 conservation through the alignment, with red for highly conserved residues, blue for lower



1381 conservation and grey for no conservation. Identical amino acid percentage to XopL<sup>Xcv</sup> is  
1382 displayed to the right of the alignment.

1383 **(B)** Closer view of the region 201-299 of the alignment with amino acids colored according to  
1384 the Rasmol coloration. Lysine K191 is indicated with a red arrow.

1385

## 1386 **References**

1387

1388 Adams EHG, Spoel SH (2018) The ubiquitin-proteasome system as a transcriptional regulator  
1389 of plant immunity. *J Exp Bot* 69: 4529-4537

1390 Adlung N, Prochaska H, Thieme S, Banik A, Bluher D, John P, Nagel O, Schulze S, Gantner J,  
1391 Delker C *et al* (2016) Non-host Resistance Induced by the *Xanthomonas* Effector XopQ Is  
1392 Widespread within the Genus *Nicotiana* and Functionally Depends on EDS1. *Front Plant Sci*  
1393 7: 1796

1394 Ahn G, Kim H, Kim DH, Hanh H, Yoon Y, Singaram I, Wijesinghe KJ, Johnson KA, Zhuang  
1395 X, Liang Z *et al* (2017) SH3 Domain-Containing Protein 2 Plays a Crucial Role at the Step of  
1396 Membrane Tubulation during Cell Plate Formation. *Plant Cell* 29: 1388-1405

1397 Albers P, Üstün S, Witzel K, Kraner M, Börnke F (2019) A Remorin from *Nicotiana*  
1398 *benthamiana* Interacts with the *Pseudomonas* Type-III Effector Protein HopZ1a and is  
1399 Phosphorylated by the Immune-Related Kinase PBS1. *Mol Plant Microbe Interact* 32: 1229-  
1400 1242

1401 Banfield MJ (2015) Perturbation of host ubiquitin systems by plant pathogen/pest effector  
1402 proteins. *Cell Microbiol* 17: 18-25

1403 Borchert N, Dieterich C, Krug K, Schutz W, Jung S, Nordheim A, Sommer RJ, Macek B (2010)  
1404 Proteogenomics of *Pristionchus pacificus* reveals distinct proteome structure of nematode  
1405 models. *Genome Res* 20: 837-846

1406 Büttner D (2016) Behind the lines-actions of bacterial type III effector proteins in plant cells.  
1407 *FEMS Microbiol Rev* 40: 894-937

1408 Chai Q, Wang X, Qiang L, Zhang Y, Ge P, Lu Z, Zhong Y, Li B, Wang J, Zhang L *et al* (2019)  
1409 A *Mycobacterium tuberculosis* surface protein recruits ubiquitin to trigger host xenophagy. *Nat*  
1410 *Commun* 10: 1973

1411 Clough SJ, Bent AF (1998) Floral dip: a simplified method for *Agrobacterium*-mediated  
1412 transformation of *Arabidopsis thaliana*. *Plant J* 16: 735-743

1413 Dagdas YF, Belhaj K, Maqbool A, Chaparro-Garcia A, Pandey P, Petre B, Tabassum N, Cruz-  
1414 Mireles N, Hughes RK, Sklenar J *et al* (2016) An effector of the Irish potato famine pathogen  
1415 antagonizes a host autophagy cargo receptor. *Elife* 5

1416 Dagdas YF, Pandey P, Tumtas Y, Sanguankiatichai N, Belhaj K, Duggan C, Leary AY,  
1417 Segretin ME, Contreras MP, Savage Z *et al* (2018) Host autophagy machinery is diverted to the  
1418 pathogen interface to mediate focal defense responses against the Irish potato famine pathogen.  
1419 *Elife* 7

1420 Dauphinee AN, Cardoso C, Dalman K, Ohlsson JA, Fick SB, Robert S, Hicks GR, Bozhkov  
1421 PV, Minina EA (2019) Chemical Screening Pipeline for Identification of Specific Plant  
1422 Autophagy Modulators. *Plant Physiol* 181: 855-866

1423 Dupont N, Lacas-Gervais S, Bertout J, Paz I, Freche B, Van Nhieu GT, van der Goot FG,  
1424 Sansonetti PJ, Lafont F (2009) Shigella phagocytic vacuolar membrane remnants participate in  
1425 the cellular response to pathogen invasion and are regulated by autophagy. *Cell Host Microbe*  
1426 6: 137-149

1427 Erickson JL, Adlung N, Lampe C, Bonas U, Schattat MH (2018) The *Xanthomonas* effector  
1428 XopL uncovers the role of microtubules in stromule extension and dynamics in *Nicotiana*  
1429 *benthamiana*. *Plant J* 93: 856-870

- 1430 Furlan G, Klinkenberg J, Trujillo M (2012) Regulation of plant immune receptors by  
1431 ubiquitination. *Front Plant Sci* 3: 238
- 1432 Furlan G, Nakagami H, Eschen-Lippold L, Jiang X, Majovsky P, Kowarschik K, Hoehenwarter  
1433 W, Lee J, Trujillo M (2017) Changes in PUB22 Ubiquitination Modes Triggered by  
1434 MITOGEN-ACTIVATED PROTEIN KINASE3 Dampen the Immune Response. *Plant Cell*  
1435 29: 726-745
- 1436 Gantner J, Ordon J, Kretschmer C, Guerois R, Stuttmann J (2019) An EDS1-SAG101 Complex  
1437 Is Essential for TNL-Mediated Immunity in *Nicotiana benthamiana*. *Plant Cell* 31: 2456-2474
- 1438 Germic N, Frangez Z, Yousefi S, Simon HU (2019) Regulation of the innate immune system  
1439 by autophagy: neutrophils, eosinophils, mast cells, NK cells. *Cell Death Differ* 26: 703-714
- 1440 Gomes LC, Dikic I (2014) Autophagy in antimicrobial immunity. *Mol Cell* 54: 224-233
- 1441 Grefen C, Donald N, Hashimoto K, Kudla J, Schumacher K, Blatt MR (2010) A ubiquitin-10  
1442 promoter-based vector set for fluorescent protein tagging facilitates temporal stability and  
1443 native protein distribution in transient and stable expression studies. *Plant J* 64: 355-365
- 1444 Gu Y, Zavaliev R, Dong X (2017) Membrane Trafficking in Plant Immunity. *Mol Plant* 10:  
1445 1026-1034
- 1446 Hafrén A, Macia JL, Love AJ, Milner JJ, Drucker M, Hofius D (2017) Selective autophagy  
1447 limits cauliflower mosaic virus infection by NBR1-mediated targeting of viral capsid protein  
1448 and particles. *Proc Natl Acad Sci U S A* 114: E2026-E2035
- 1449 Hafrén A, Üstün S, Hochmuth A, Svenning S, Johansen T, Hofius D (2018) Turnip Mosaic  
1450 Virus Counteracts Selective Autophagy of the Viral Silencing Suppressor HCpro. *Plant Physiol*  
1451 176: 649-662
- 1452 Hu H, Sun SC (2016) Ubiquitin signaling in immune responses. *Cell Res* 26: 457-483
- 1453 Huang J, Brumell JH (2014) Bacteria-autophagy interplay: a battle for survival. *Nat Rev*  
1454 *Microbiol* 12: 101-114
- 1455 Khan M, Seto D, Subramaniam R, Desveaux D (2018) Oh, the places they'll go! A survey of  
1456 phytopathogen effectors and their host targets. *Plant J* 93: 651-663
- 1457 Kim JG, Stork W, Mudgett MB (2013) *Xanthomonas* type III effector XopD desumoylates  
1458 tomato transcription factor SlERF4 to suppress ethylene responses and promote pathogen  
1459 growth. *Cell Host Microbe* 13: 143-154
- 1460 Kim JG, Taylor KW, Hotson A, Keegan M, Schmelz EA, Mudgett MB (2008) XopD SUMO  
1461 protease affects host transcription, promotes pathogen growth, and delays symptom  
1462 development in *xanthomonas*-infected tomato leaves. *Plant Cell* 20: 1915-1929
- 1463 Kirkin V, Lamark T, Johansen T, Dikic I (2009) NBR1 cooperates with p62 in selective  
1464 autophagy of ubiquitinated targets. *Autophagy* 5: 732-733
- 1465 Kliza K, Taumer C, Pinzuti I, Franz-Wachtel M, Kunzelmann S, Stieglitz B, Macek B, Husnjak  
1466 K (2017) Internally tagged ubiquitin: a tool to identify linear polyubiquitin-modified proteins  
1467 by mass spectrometry. *Nat Methods* 14: 504-512
- 1468 Kovach ME, Elzer PH, Hill DS, Robertson GT, Farris MA, Roop RM, 2nd, Peterson KM (1995)  
1469 Four new derivatives of the broad-host-range cloning vector pBBR1MCS, carrying different  
1470 antibiotic-resistance cassettes. *Gene* 166: 175-176
- 1471 Kubori T, Galan JE (2003) Temporal regulation of salmonella virulence effector function by  
1472 proteasome-dependent protein degradation. *Cell* 115: 333-342
- 1473 Lal NK, Thanasuwat B, Huang PJ, Cavanaugh KA, Carter A, Michelmore RW, Dinesh-Kumar  
1474 SP (2020) Phytopathogen Effectors Use Multiple Mechanisms to Manipulate Plant Autophagy.  
1475 *Cell Host Microbe* 28: 558-571 e556
- 1476 Langin G, Gouguet P, Üstün S (2020) Microbial Effector Proteins - A Journey through the  
1477 Proteolytic Landscape. *Trends Microbiol* 28: 523-535
- 1478 Leary AY, Savage Z, Tumtas Y, Bozkurt TO (2019) Contrasting and emerging roles of  
1479 autophagy in plant immunity. *Curr Opin Plant Biol* 52: 46-53

- 1480 Lei L, Stevens DM, Coaker G (2020) Phosphorylation of the *Pseudomonas* Effector AvrPtoB  
1481 by Arabidopsis SnRK2.8 Is Required for Bacterial Virulence. *Mol Plant* 13: 1513-1522
- 1482 Lenz HD, Haller E, Melzer E, Kober K, Wurster K, Stahl M, Bassham DC, Vierstra RD, Parker  
1483 JE, Bautor J *et al* (2011) Autophagy differentially controls plant basal immunity to biotrophic  
1484 and necrotrophic pathogens. *Plant J* 66: 818-830
- 1485 Levine B, Mizushima N, Virgin HW (2011) Autophagy in immunity and inflammation. *Nature*  
1486 469: 323-335
- 1487 Lorenz C, Büttner D (2009) Functional characterization of the type III secretion ATPase HrcN  
1488 from the plant pathogen *Xanthomonas campestris* pv. *vesicatoria*. *J Bacteriol* 191: 1414-1428
- 1489 Lou L, Zhang P, Piao R, Wang Y (2019) Salmonella Pathogenicity Island 1 (SPI-1) and Its  
1490 Complex Regulatory Network. *Front Cell Infect Microbiol* 9: 270
- 1491 Marshall RS, Vierstra RD (2018) Autophagy: The Master of Bulk and Selective Recycling.  
1492 *Annu Rev Plant Biol* 69: 173-208
- 1493 Mesquita FS, Thomas M, Sachse M, Santos AJ, Figueira R, Holden DW (2012) The Salmonella  
1494 deubiquitinase SseL inhibits selective autophagy of cytosolic aggregates. *PLoS Pathog* 8:  
1495 e1002743
- 1496 Minina EA, Moschou PN, Vetukuri RR, Sanchez-Vera V, Cardoso C, Liu Q, Elander PH,  
1497 Dalman K, Beganovic M, Lindberg Yilmaz J *et al* (2018) Transcriptional stimulation of rate-  
1498 limiting components of the autophagic pathway improves plant fitness. *J Exp Bot* 69: 1415-  
1499 1432
- 1500 Mostowy S (2013) Autophagy and bacterial clearance: a not so clear picture. *Cell Microbiol*  
1501 15: 395-402
- 1502 Nagel MK, Kalinowska K, Vogel K, Reynolds GD, Wu Z, Anzenberger F, Ichikawa M,  
1503 Tsutsumi C, Sato MH, Kuster B *et al* (2017) Arabidopsis SH3P2 is an ubiquitin-binding protein  
1504 that functions together with ESCRT-I and the deubiquitylating enzyme AMSH3. *Proc Natl*  
1505 *Acad Sci U S A* 114: E7197-E7204
- 1506 Nakagawa T, Kurose T, Hino T, Tanaka K, Kawamukai M, Niwa Y, Toyooka K, Matsuoka K,  
1507 Jinbo T, Kimura T (2007) Development of series of gateway binary vectors, pGWBs, for  
1508 realizing efficient construction of fusion genes for plant transformation. *J Biosci Bioeng* 104:  
1509 34-41
- 1510 Pandey P, Leary AY, Tumtas Y, Savage Z, Dagvadorj B, Duggan C, Yuen EL,  
1511 Sanguankiatichai N, Tan E, Khandare V *et al* (2021) An oomycete effector subverts host  
1512 vesicle trafficking to channel starvation-induced autophagy to the pathogen interface. *Elife* 10  
1513 Pohl C, Dikic I (2019) Cellular quality control by the ubiquitin-proteasome system and  
1514 autophagy. *Science* 366: 818-822
- 1515 Schultink A, Qi T, Lee A, Steinbrenner AD, Staskawicz B (2017) Roq1 mediates recognition  
1516 of the *Xanthomonas* and *Pseudomonas* effector proteins XopQ and HopQ1. *Plant J* 92: 787-  
1517 795
- 1518 Schwanhausser B, Busse D, Li N, Dittmar G, Schuchhardt J, Wolf J, Chen W, Selbach M (2011)  
1519 Global quantification of mammalian gene expression control. *Nature* 473: 337-342
- 1520 Singer AU, Schulze S, Skarina T, Xu X, Cui H, Eschen-Lippold L, Egler M, Srikumar T,  
1521 Raught B, Lee J *et al* (2013) A pathogen type III effector with a novel E3 ubiquitin ligase  
1522 architecture. *PLoS Pathog* 9: e1003121
- 1523 Svenning S, Lamark T, Krause K, Johansen T (2011) Plant NBR1 is a selective autophagy  
1524 substrate and a functional hybrid of the mammalian autophagic adapters NBR1 and  
1525 p62/SQSTM1. *Autophagy* 7: 993-1010
- 1526 Timilsina S, Potnis N, Newberry EA, Liyanapathirana P, Iruegas-Bocardo F, White FF, Goss  
1527 EM, Jones JB (2020) *Xanthomonas* diversity, virulence and plant-pathogen interactions. *Nat*  
1528 *Rev Microbiol* 18: 415-427

- 1529 Üstün S, Bartetzko V, Börnke F (2013) The *Xanthomonas campestris* type III effector XopJ  
1530 targets the host cell proteasome to suppress salicylic-acid mediated plant defence. *PLoS Pathog*  
1531 9: e1003427
- 1532 Üstün S, Bartetzko V, Börnke F (2015) The *Xanthomonas* effector XopJ triggers a conditional  
1533 hypersensitive response upon treatment of *N. benthamiana* leaves with salicylic acid. *Front*  
1534 *Plant Sci* 6: 599
- 1535 Üstün S, Börnke F (2014) Interactions of *Xanthomonas* type-III effector proteins with the plant  
1536 ubiquitin and ubiquitin-like pathways. *Front Plant Sci* 5: 736
- 1537 Üstün S, Börnke F (2015) The *Xanthomonas campestris* type III effector XopJ proteolytically  
1538 degrades proteasome subunit RPT6. *Plant Physiol* 168: 107-119
- 1539 Üstün S, Hafrén A, Hofius D (2017) Autophagy as a mediator of life and death in plants. *Curr*  
1540 *Opin Plant Biol* 40: 122-130
- 1541 Üstün S, Hafrén A, Liu Q, Marshall RS, Minina EA, Bozhkov PV, Vierstra RD, Hofius D  
1542 (2018) Bacteria Exploit Autophagy for Proteasome Degradation and Enhanced Virulence in  
1543 Plants. *Plant Cell* 30: 668-685
- 1544 Üstün S, Hofius D (2018) Anti- and pro-microbial roles of autophagy in plant-bacteria  
1545 interactions. *Autophagy* 14: 1465-1466
- 1546 Üstün S, König P, Guttman DS, Börnke F (2014) HopZ4 from *Pseudomonas syringae*, a  
1547 member of the HopZ type III effector family from the YopJ superfamily, inhibits the  
1548 proteasome in plants. *Mol Plant Microbe Interact* 27: 611-623
- 1549 Üstün S, Sheikh A, Gimenez-Ibanez S, Jones A, Ntoukakis V, Börnke F (2016) The Proteasome  
1550 Acts as a Hub for Plant Immunity and Is Targeted by *Pseudomonas* Type III Effectors. *Plant*  
1551 *Physiol* 172: 1941-1958
- 1552 van Wijk SJ, Fiskin E, Putyrski M, Pampaloni F, Hou J, Wild P, Kensche T, Grecco HE,  
1553 Bastiaens P, Dikic I (2012) Fluorescence-based sensors to monitor localization and functions  
1554 of linear and K63-linked ubiquitin chains in cells. *Mol Cell* 47: 797-809
- 1555 Yan Y, Wang P, He C, Shi H (2017) MeWRKY20 and its interacting and activating autophagy-  
1556 related protein 8 (MeATG8) regulate plant disease resistance in cassava. *Biochem Biophys Res*  
1557 *Commun* 494: 20-26
- 1558 Yang Y, Klionsky DJ (2020) Autophagy and disease: unanswered questions. *Cell Death Differ*  
1559 27: 858-871
- 1560 Zeng H, Xie Y, Liu G, Lin D, He C, Shi H (2018) Molecular identification of GAPDHs in  
1561 cassava highlights the antagonism of MeGAPCs and MeATG8s in plant disease resistance  
1562 against cassava bacterial blight. *Plant Mol Biol* 97: 201-214
- 1563 Zhang Y, Higashide W, Dai S, Sherman DM, Zhou D (2005) Recognition and ubiquitination  
1564 of *Salmonella* type III effector SopA by a ubiquitin E3 ligase, HsrMA1. *J Biol Chem* 280:  
1565 38682-38688
- 1566 Zheng YT, Shahnazari S, Brech A, Lamark T, Johansen T, Brumell JH (2009) The adaptor  
1567 protein p62/SQSTM1 targets invading bacteria to the autophagy pathway. *J Immunol* 183:  
1568 5909-5916
- 1569 Zhou J, Wang J, Cheng Y, Chi YJ, Fan B, Yu JQ, Chen Z (2013) NBR1-mediated selective  
1570 autophagy targets insoluble ubiquitinated protein aggregates in plant stress responses. *PLoS*  
1571 *Genet* 9: e1003196
- 1572 Zhuang X, Jiang L (2014) Autophagosome biogenesis in plants: roles of SH3P2. *Autophagy*  
1573 10: 704-705
- 1574 Zhuang X, Wang H, Lam SK, Gao C, Wang X, Cai Y, Jiang L (2013) A BAR-domain protein  
1575 SH3P2, which binds to phosphatidylinositol 3-phosphate and ATG8, regulates autophagosome  
1576 formation in *Arabidopsis*. *Plant Cell* 25: 4596-4615
- 1577
- 1578

1579 **Supporting information**

1580

1581 **Figure S1:** Silencing of *ATG7* in *N. benthamiana* plants abolishes autophagosome formation  
1582 and Xcv blocks autophagy at 6hpi.

1583 **Figure S2:** Virus induced gene silencing of *ATG7* in *N. benthamiana* is beneficial for Xcv.

1584 **Figure S3:** Suppression of autophagy is enhanced by T3Es.

1585 **Figure S4:** Screening for Xanthomonas T3Es with altered autophagic flux.

1586 **Figure S5:** XopL contributes to Xcv virulence.

1587 **Figure S6:** Joka2 bodies are induced during Xcv infection in a XopL-dependent manner.

1588 **Figure S7:** Transgenic *A. thaliana* GFP-XopL plants display defects in autophagic degradation.

1589 **Figure S8:** SH3P2 is conserved in different plant species.

1590 **Figure S8:** XopL is ubiquitinated *in planta*.

1591 **Supplemental Video 1:** XopL/SH3P2 puncta are mobile.

1592 **Figure S9:** Silencing of SH3P2 in *N. benthamiana* perturbs autophagy.

1593 **Figure S10:** Gene expression of SH3P2 is induced by XopL and XopL-mediated degradation  
1594 is due to post-transcriptional degradation events.

1595 **Figure S11:** RFP-XopL  $\Delta E3$  co-localizes with and is unable to ubiquitinate SH3P2-GFP.

1596 **Figure S12:** XopL is degraded in the vacuole.

1597 **Figure S13:** Virus-induced gene silencing of *Joka2* in *N. benthamiana* plants.

1598 **Figure S14:** XopL in planta ubiquitination is enhanced by the presence of AIMp.

1599 **Figure S15:** XopL is ubiquitinated *in planta* and undergoes self-ubiquitination.

1600 **Figure S16:** Characterization of XopL<sub>K191A</sub> variant *in vitro* and *in planta*.

1601 **Figure S17:** XopL  $\Delta E3$  is degraded by autophagy.

1602 **Figure S18:** XopL K191 residue is highly conserved through the Xanthomonas genus

1603 **Supplemental Table 1:** Primers used in manuscript.

1604

1605

1606

1607

1608

1609

1610

1611

1612

1613

1614

1615

1616

1617

1618

1619

1620

1621

1622

1623

1624

1625

1626

1627

1628

1629 **Supplemental Figure 1**

**A**

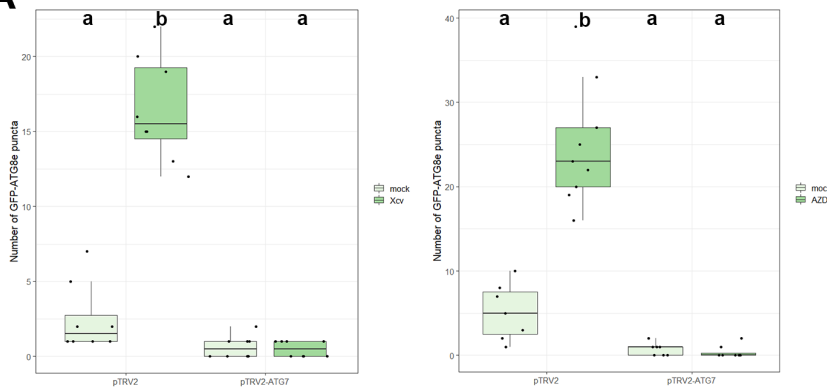

**B**

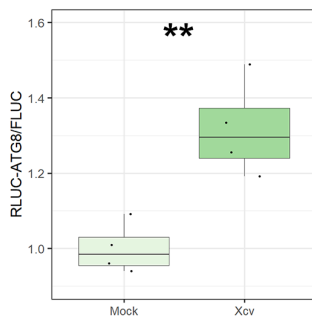

1630  
1631 **Fig. S1: Silencing of *ATG7* in *N. benthamiana* plants abolishes autophagosome formation**  
1632 **and *Xcv* blocks autophagy at 6hpi.** GFP-ATG8e-labeled puncta were quantified from plants  
1633 silenced for *ATG7* (pTRV2-ATG7) infected with mock or *Xcv*  $\Delta xopQ$  at 6hpi in the presence  
1634 or absence of ConA, and of AZD. Puncta were calculated from z-stacks (X) of  $n=12$  individuals  
1635 using ImageJ. Different letters indicate statistically significant different groups ( $P < 0.05$ ) as  
1636 determined by one way ANOVA.

1637 **(B)** RLUC-ATG8a or RLUC-NBR1 constructs were coexpressed with internal control FLUC  
1638 in *N. benthamiana*. *Xcv*  $\Delta xopQ$  or infiltration buffer (mock) was co-infiltrated with  
1639 Agrobacteria containing the respective constructs. RLUC and FLUC activities were  
1640 simultaneously measured in leaf extracts at 8 h post- infiltration using the dual-luciferase  
1641 system. Values represent the ratio of RLUC-ATG8a and FLUC activities ( $n=4$ ). Statistical  
1642 significance (\*\*\*)  $P < 0.001$  was revealed by Student's *t*-test. The experiment was repeated 3  
1643 times with similar results.

1644 **Supplemental Figure 2**

1645

1646

**A**

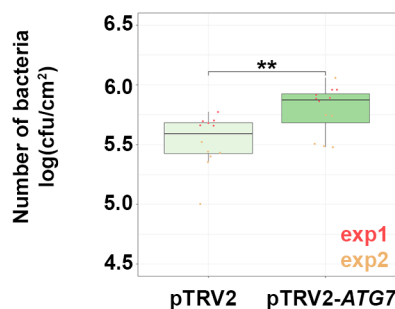

**B**

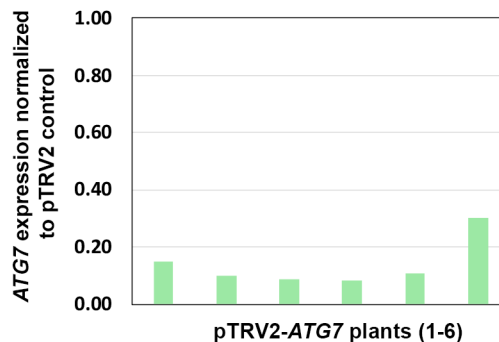

1647

1648  
1649  
1650  
1651  
1652  
1653  
1654  
1655  
1656  
1657  
1658  
1659  
1660  
1661

**Fig. S2: Virus induced gene silencing of *ATG7* in *N. benthamiana* is beneficial for *Xcv*.**

(A) Growth of *Xcv*  $\Delta xopQ$  in *N. benthamiana* plants silenced for *ATG7* (pTRV2-*ATG7*) compared to control plants (pTRV2). Leaves were dip-inoculated with a bacteria suspension at OD<sub>600</sub> = 0.2 and bacteria were quantified at 6 dpi. Data represent the mean SD (n = 6). Significant differences were calculated using Student's *t*-test and are indicated by \*\*, P < 0.01. The experiment was repeated twice with similar trends. Red and yellow data points represent repeats of the experiment.

(B) qRT-PCR analysis of *ATG7* mRNA levels in silenced *N. benthamiana* plants. *Actin* expression was used to normalize the expression value in each sample, and relative expression values were determined against the mean expression in pTRV2 (control) plants.

**Supplemental Figure 3**

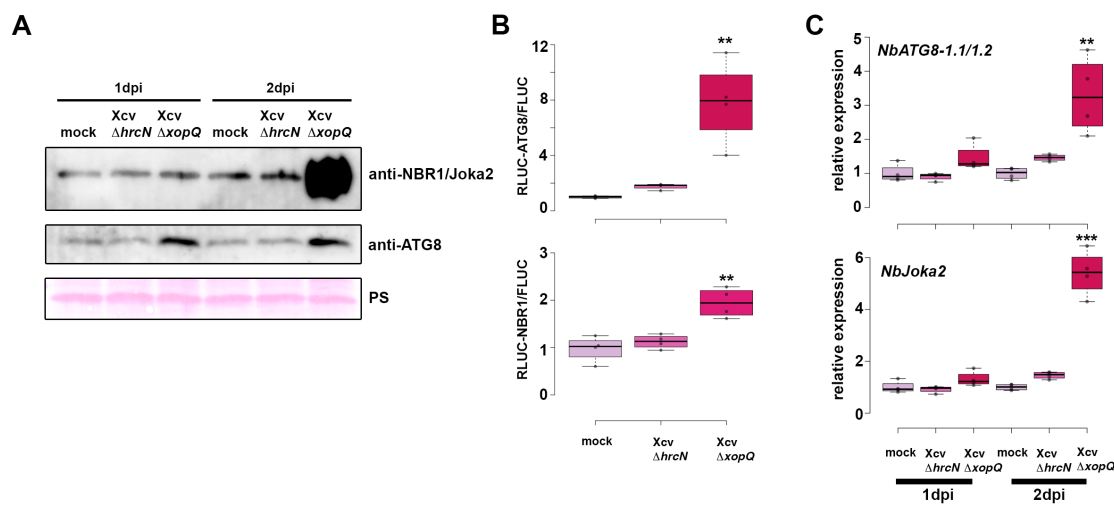

1662  
1663  
1664  
1665  
1666  
1667  
1668  
1669  
1670  
1671  
1672  
1673  
1674  
1675  
1676  
1677  
1678  
1679  
1680  
1681  
1682  
1683  
1684  
1685

**Fig. S3: Suppression of autophagy is enhanced by T3Es.**

(A) Immunoblot analysis of NBR1 and ATG8 protein levels in *Xcv*  $\Delta xopQ$ ,  $\Delta hrcN$  or mock infected *N. benthamiana* plants at 1 and 2dpi. Ponceau Staining (PS) served as a loading control. The experiment was repeated twice with similar results.

(B) Autophagic flux determined by quantitative dual-luciferase assay. RLUC-ATG8a or RLUC-NBR1 constructs were coexpressed with internal control FLUC in *N. benthamiana*. *Xcv*  $\Delta xopQ$  and  $\Delta hrcN$  were respectively co-infiltrated with *Agrobacteria* containing the luciferase constructs. *Renilla* and *Firefly* luciferase activities were simultaneously measured in leaf extracts at 48 h post- infiltration using the dual-luciferase system. Values represent the ratio of RLUC-ATG8a and FLUC activities normalized to mock (n=4). Statistical significance (\*\*P<0.01) was revealed by Student's *t*-test. The experiment was repeated 2 times with similar results.

(C) RT-qPCR analysis of *NbATG8-1.1/2* and *NbJoka2* transcript levels upon challenge of *N. benthamiana* plants with *Xcv*  $\Delta xopQ$  and  $\Delta hrcN$  for 1 and 2 dpi compared to mock infected plants. Values represent expression relative to mock control of respective time point and were normalized to *actin*. Statistical significance (\*\*\*) P < 0.001) was revealed by Student's *t*-test.

1686 **Supplemental Figure 4**

1687

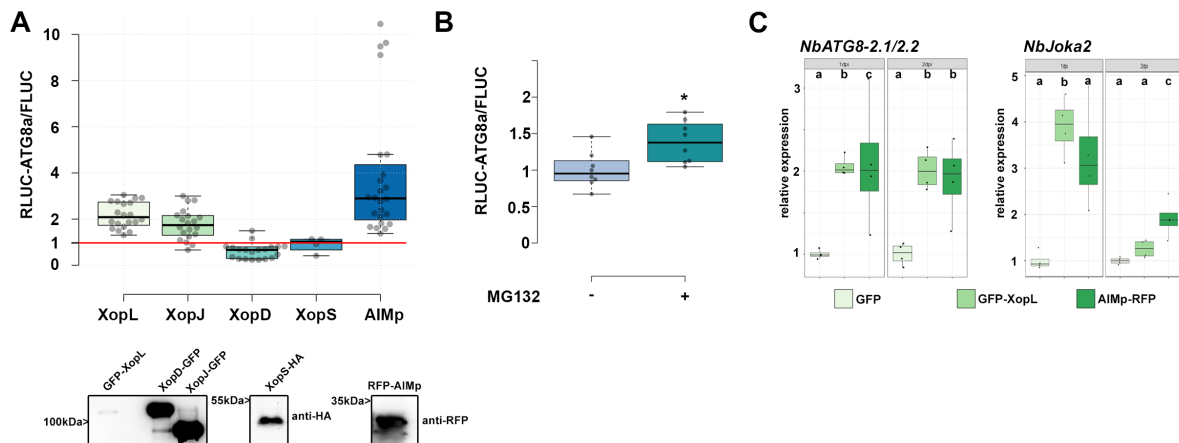

1688

1689

1690 **Fig. S4: Screening for Xanthomonas T3Es with altered autophagic flux.**

1691 **(A)** RLUC-ATG8a constructs were coexpressed with internal control FLUC in *N. benthamiana*.  
 1692 GFP-XopL, XopJ-GFP, XopD-GFP and XopS-HA were co-infiltrated with Agrobacteria  
 1693 carrying the RLUC-ATG8a and FLUC constructs. Renilla and Firefly luciferase activities were  
 1694 simultaneously measured in leaf extracts at 48 h post- infiltration using the dual-luciferase  
 1695 system. Values represent the ratio of RLUC-ATG8a to FLUC activity normalized to GFP  
 1696 control (XopL, XopJ, XopD, AIMp; n=20; XopS n=4). Expression of T3Es and RFP-AIMp  
 1697 were verified with the indicated antibodies.

1698 **(B)** RLUC-ATG8a constructs were coexpressed with internal control FLUC in *N. benthamiana*.  
 1699 Plants were treated with MG132 for 6 hours prior measurement. Values represent the ratio of  
 1700 RLUC-ATG8a to FLUC activity normalized to vector control (n=8). Statistical significance (\*  
 1701  $P < 0.5$ ) was revealed by Student's *t*-test.

1702 **(C)** RT-qPCR analysis of *NbATG8-2.1/2.2* and *NbJoka2* transcript levels upon Agrobacteria-  
 1703 mediated transient expression of GFP, GFP-XopL or AIMp for 1 and 2 dpi. Values represent  
 1704 expression relative to GFP control of respective time point and were normalized to *actin*.  
 1705 Statistical significantly different groups are denoted by different letters, as calculated using  
 1706 Kruskal-Wallis rank sum test ( $P < 0.05$ ).

1707

1708 **Supplemental Figure 5**



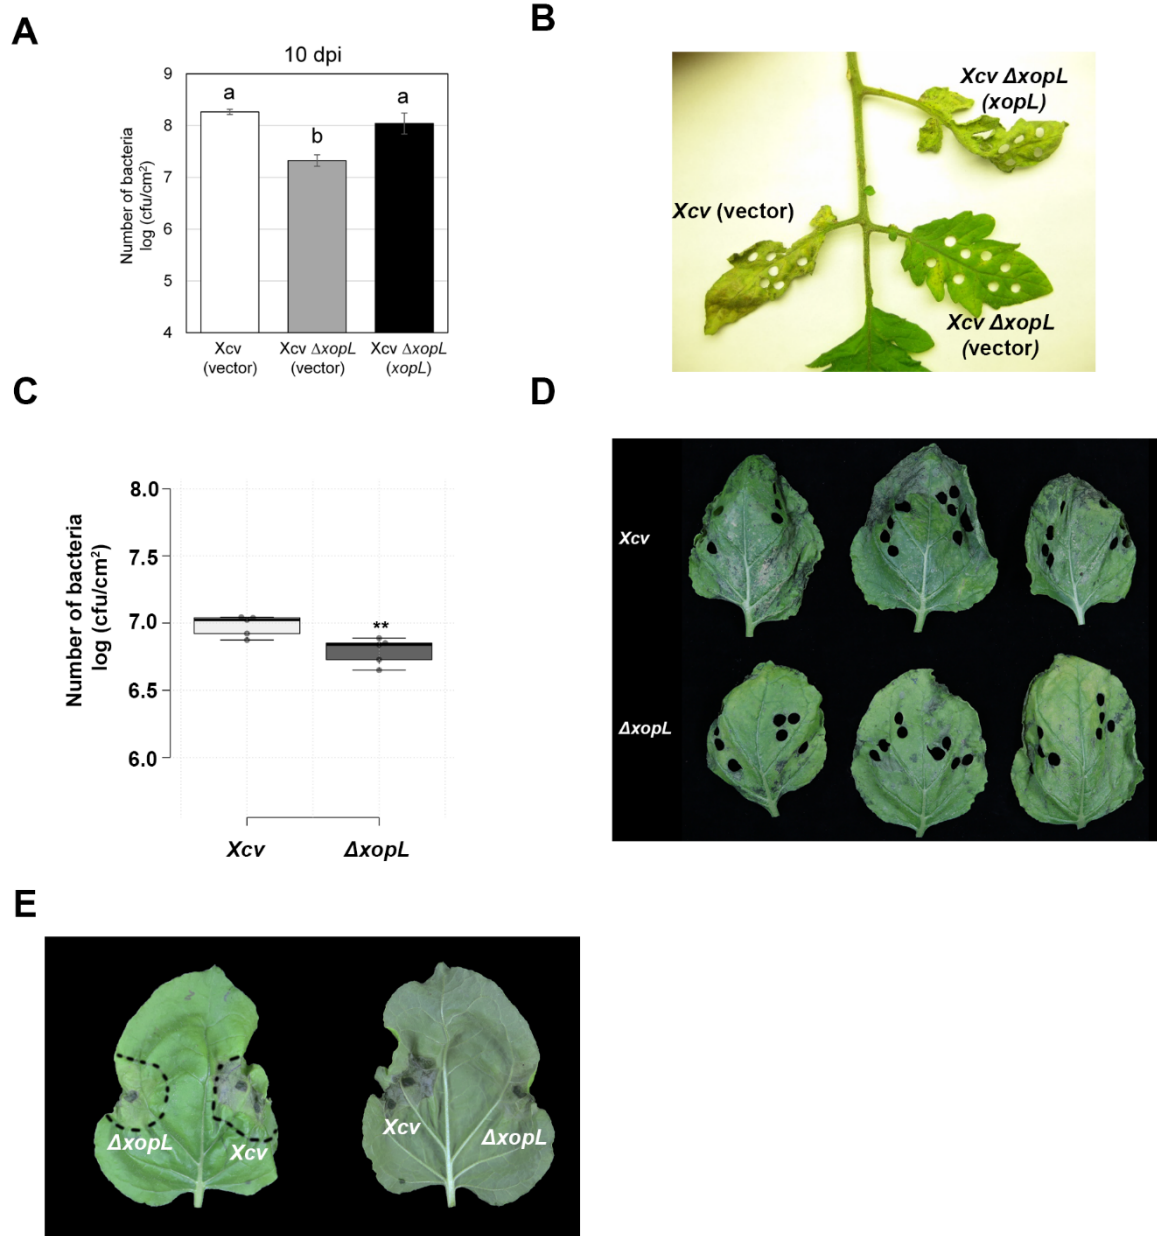

1709  
1710

1711 **Fig. S5: XopL contributes to Xcv virulence.**

1712 (A) Growth of Xcv 85-10 (vector) (white bar), Xcv 85-10  $\Delta xopL$  (vector) (grey bar), and Xcv  
1713 85-10  $\Delta xopL$  (*xopL*) (black bar) strains in tomato VF36 leaves. Leaves were dipped in a  $2 \times 10^8$   
1714 CFU/mL suspension of bacteria. The number of bacteria in each leaf was quantified at 10 dpi.  
1715 Data points represent mean log<sub>10</sub> colony-forming units per cm<sup>2</sup>  $\pm$  SD of three plants. Different  
1716 letters above bars indicate statistically significant (Tukey's honestly significant difference  
1717 (HSD) test,  $P < 0.05$ ) differences between samples. Vector = pBBR1MCS-2.

1718 (B) Delayed disease symptom development in tomato leaves inoculated with Xcv or Xcv  $\Delta xopL$ .  
1719 Tomato leaves inoculated with strains described in (A) were photographed at 14 dpi.

1720 (C) Growth of Xcv 85-10, Xcv 85-10  $\Delta xopL$  strains in *rogl* *N. benthamiana* leaves. Leaves  
1721 were dipped in a  $2 \times 10^8$  CFU/mL suspension of bacteria. The number of bacteria in each leaf  
1722 was quantified at 10 dpi (n = 5). Significant differences were calculated using Student's *t*-test  
1723 (\*\*,  $P < 0.01$ ). The experiment was repeated twice with similar trends.

1724 **(D)** Delayed disease symptom development in *roq1 N. benthamiana* leaves dip-inoculated with  
 1725 *Xcv* or *Xcv ΔxopL*. *N. benthamiana roq1* leaves inoculated with strains described in (C) were  
 1726 photographed at 10 dpi.

1727 **(E)** Delayed symptom development in *roq1 N. benthamiana* leaves inoculated with *Xcv* or *Xcv*  
 1728  $\Delta xopL$ . Leaves were syringe-inoculated with OD<sub>600</sub>=0.2 and photographed at 3 dpi.

1729  
 1730  
 1731

### Supplemental Figure 6

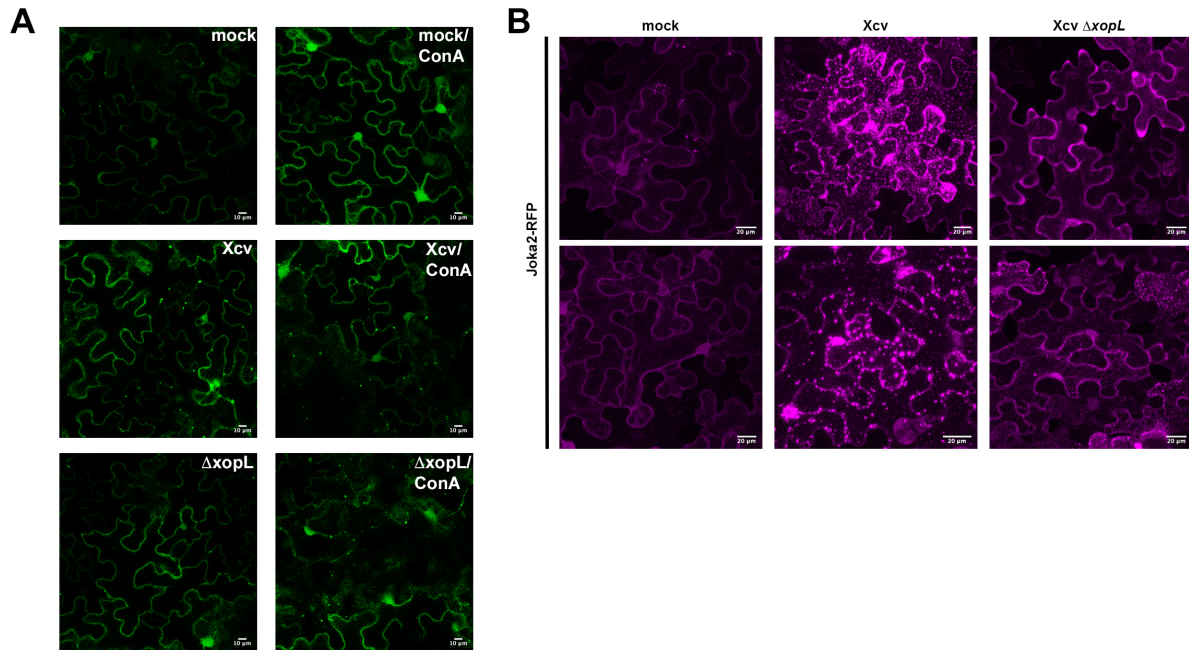

1732 **Fig. S6: Joka2 bodies are induced during *Xcv* infection in a *XopL*-dependent manner.**  
 1733 **(A)** GFP-ATG8e-labeled autophagosomes imaged from *N. benthamiana* plants infected with  
 1734 mock, *Xcv* or *Xcv ΔxopL* at 2 dpi in the presence or absence of ConA (bars = 10 μm).  
 1735 **(B)** RFP-Joka2 labelled puncta or aggregates upon challenge of *N. benthamiana* leaves with  
 1736 mock, *Xcv* or *Xcv ΔxopL* infection at 1 dpi.

1737  
 1738  
 1739  
 1740

### Supplemental Figure 7

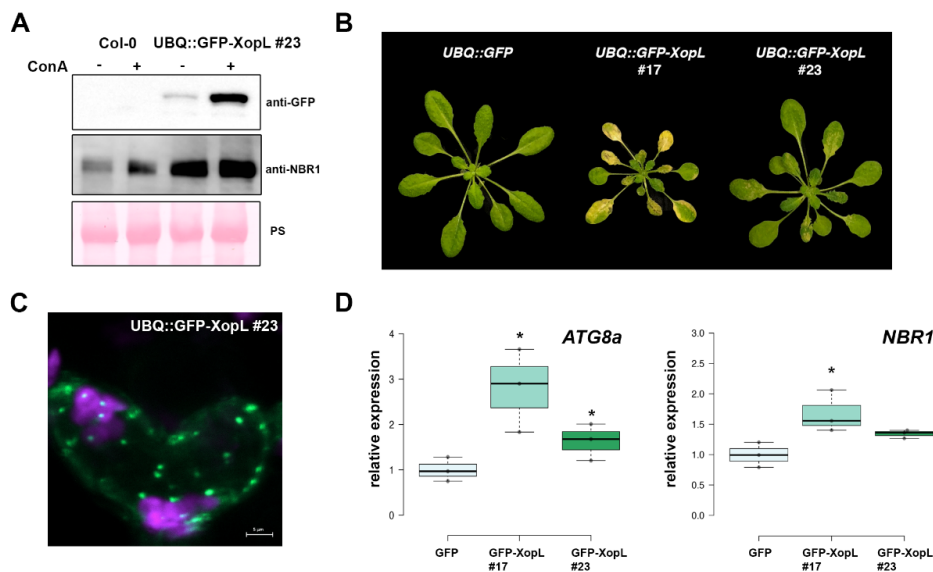

1741  
 1742

1743 **Fig. S7: Transgenic *A. thaliana* GFP-XopL plants display defects in autophagic**  
 1744 **degradation**

1745 (A) Immunoblot analysis of NBR1 protein levels in transgenic UBQ::GFP-XopL plants or Col-  
 1746 0. Plants were treated with concanamycin A (ConA) for 6 hours. Expression of GFP-XopL was  
 1747 verified with an anti-GFP antibody. Ponceau S staining serves as a loading control.

1748 (B) 5 weeks old *A. thaliana* plants expressing UBQ::GFP-XopL develop an early senescence  
 1749 phenotype reminiscent of autophagy deficient mutants.

1750 (C) Localization analysis of GFP-XopL of transgenic *A. thaliana* UBQ::GFP-XopL #23 line.  
 1751 Image represents single confocal planes from abaxial epidermal cells (bars = 5 μm).

1752 (D) RT-qPCR analysis of *ATG8a* and *NBR1* transcript levels in *Arabidopsis thaliana* GFP or  
 1753 GFP-XopL plants. Values represent expression (n=3) relative to GFP control and were  
 1754 normalized to *PP2A*. Statistical significance (\**P*<0.05) was revealed by Student's *t*-test.

1755 **Supplemental Figure 8**  
 1756  
 1757

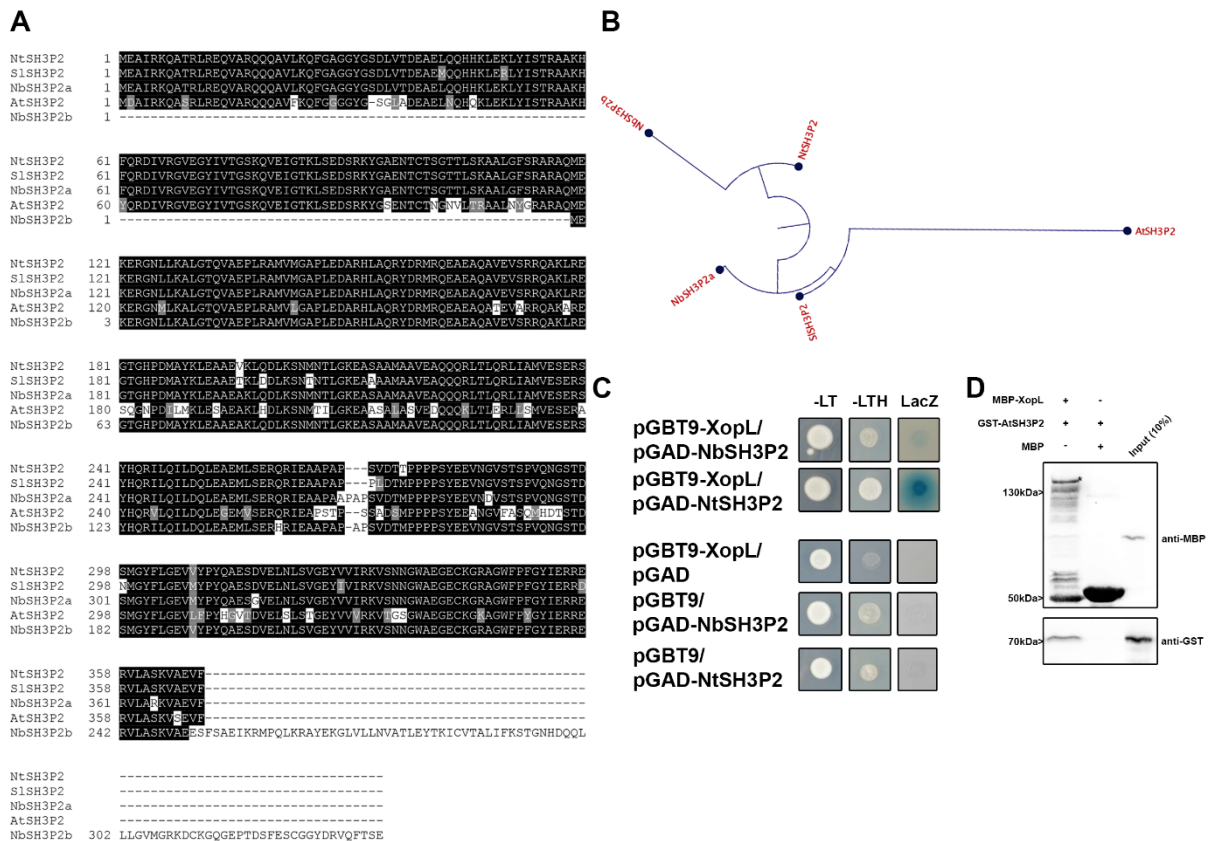

1758  
 1759

1760 **Fig. S8: SH3P2 is conserved in different plant species.**

1761 (A) Protein sequence alignment of SH3P2 from different species. The alignment was generated  
 1762 using CLUSTALW2 with default parameters and BoxShade 3.21. Positions of identical and  
 1763 similar sequences are boxed in black and grey, respectively. The following sequences were used  
 1764 to build the alignment: *Arabidopsis thaliana*, *Nicotiana tabacum*, *Nicotiana benthamiana*,  
 1765 *Solanum lycopersicum*.

1766 (B) Phylogenetic analysis of the SH3P2 from different plant species.

1767 (C) XopL interacts with SH3P2 from *Nicotiana tabacum* and *Nicotiana benthamiana*.  
 1768 Interaction of XopL with SH3P2 in yeast two-hybrid assays. XopL fused to the GAL4 DNA-  
 1769 binding domain was expressed in combination with SH3P2 fused to the GAL4 activation  
 1770 domain (AD) in yeast strain Y190. Cells were grown on selective media before a LacZ filter

1771 assay was performed. The empty AD or BD vector served as negative control. NtSH3P2 =  
 1772 *Nicotiana tabacum* SH3P2, NbSH3P2 = *Nicotiana benthamiana* –LT = yeast growth on  
 1773 medium without Leu and Trp, –HLT = yeast growth on medium lacking His, Leu, and Trp,  
 1774 indicating expression of the HIS3 reporter gene. LacZ, activity of the lacZ reporter gene.

1775 **(D)** *In vitro* co-IP assay showing direct interaction of XopL with AtSH3P2. MBP-XopL and  
 1776 GST-AtSH3P2 were expressed in *E. coli*. Pull down was performed using amylose resin.  
 1777 Proteins were detected in an immunoblot using antibodies as indicated.  
 1778

1779 **Supp Video 1: XopL/SH3P2 puncta are mobile**

1780 *Nicotiana benthamiana* leaf epidermal cells transiently expressing Venus<sup>N173</sup>-XopL in  
 1781 combination with AtSH3P2-Venus<sup>C155</sup>.  
 1782

1783 **Supplemental Figure 9**  
 1784

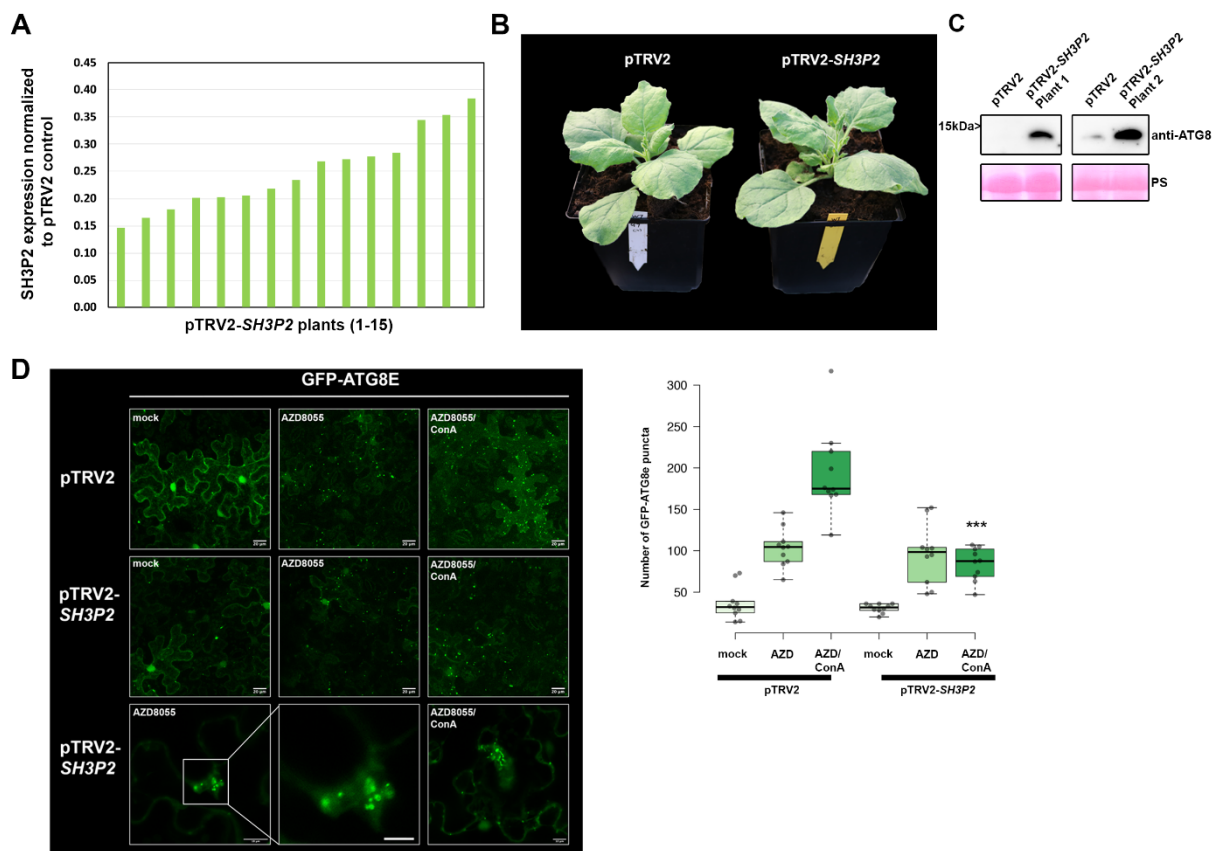

1785  
 1786

1787 **Fig. S9: Silencing of SH3P2 in *N. benthamiana* perturbs autophagy.**

1788 **(A)** qRT-PCR analysis of SH3P2 mRNA levels in silenced plants. *Actin* expression was used  
 1789 to normalize the expression value in each sample, and relative expression values were  
 1790 determined against pTRV2 control plants (set to 1).  
 1791

1792 **(B)** Phenotype of SH3P2-VIGS plants in comparison to the pTRV2 control. Picture was taken  
 1793 14 dpi.

1794 **(C)** Immunoblot analysis of ATG8 protein levels in *N. benthamiana* pTRV2 (control) and  
 1795 pTRV2-SH3P2 (*SH3P2* silencing) 2 weeks after VIGS. Ponceau Staining (PS) served as a  
 1796 loading control. The experiment was repeated twice with similar results.

1797 **(D)** GFP-ATG8e-labeled autophagosomes were quantified from pTRV2 or pTRV2-SH3P2  
 1798 plants transiently expressing GFP-ATG8e at 2dpi in the presence of autophagy inducer AZD =  
 1799 AZD8055 and AZD/ConA. Puncta were calculated from z-stacks of *n*=10 individuals using

1799 ImageJ. Statistical significance (\*\*\*) was revealed by Student's *t*-test comparing  
 1800 number of autophagosomes in AZD/ConA treatments in pTRV2 and pTRV2-*SH3P2* plants.  
 1801 The experiment was repeated twice with similar results.

1802  
 1803 **Supplemental Figure 10**

1804

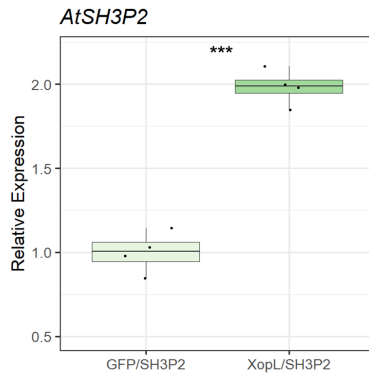

1805  
 1806

1807 **Fig. S10: Gene expression of SH3P2 is induced by XopL and XopL-mediated degradation**  
 1808 **is due to post-transcriptional degradation events.**

1809 (A) qRT-PCR analysis of *AtSH3P2*-specific mRNA levels in *N. benthamiana* plants transiently  
 1810 expressing *AtSH3P2*-HA, upon coexpression with GFP or GFP-XopL. *Actin* expression was  
 1811 used to normalize the expression value in each sample. Values represent *AtSH3P2* transcript  
 1812 level normalized to control (n=4).

1813

1814 **Supplemental Figure 11**

A

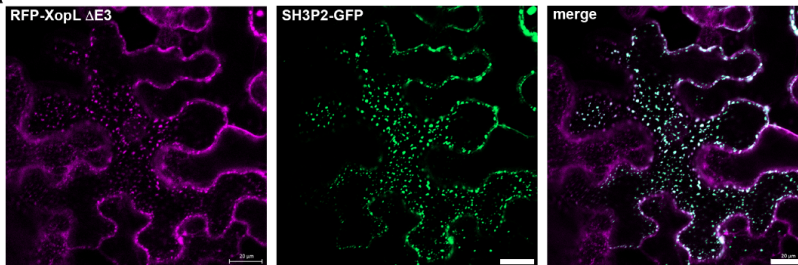

B

|              |   |   |   |   |   |
|--------------|---|---|---|---|---|
| ATP          | + | + | - | + | + |
| Ub           | + | + | + | + | + |
| E1           | + | + | + | + | + |
| E2           | + | + | + | + | + |
| GST-XopL     | - | - | - | - | + |
| GST-XopL ΔE3 | + | + | + | - | - |
| MBP-SH3P2    | + | - | + | + | - |

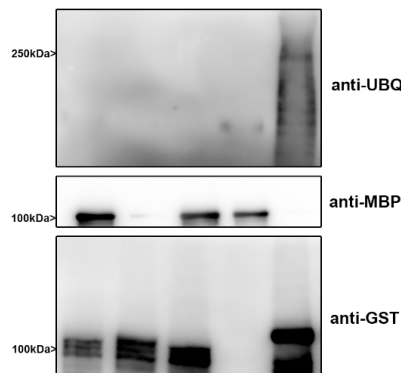

1815  
 1816

**Fig. S11: RFP-XopL ΔE3 co-localizes with and is unable to ubiquitinate SH3P2-GFP.**

1817 (A) Colocalization analysis of RFP-XopL  $\Delta E3$  with SH3P2-GFP in *N. benthamiana* leaves.  
1818 Imaging was performed 2 d after transient expression and images represent single confocal  
1819 planes from abaxial epidermal cells (bars = 20  $\mu\text{m}$ ).

1820 (B) *In vitro* ubiquitination assay reveals GST-XopL  $\Delta E3$  is unable to ubiquitinate MBP-SH3P2.  
1821 GST-XopL,  $\Delta E3$  and MBP-SH3P2 were tested using the Arabidopsis His-AtUBA1 and His-  
1822 AtUBC8. Lanes 2 to 4 are negative controls, while Lane 5 is the positive control with GST-  
1823 XopL. Proteins were separated by SDS-PAGE and detected by immunoblotting using the  
1824 indicated antibodies. The experiment was repeated three times with similar results.

1825

## 1826 Supplemental Figure 12

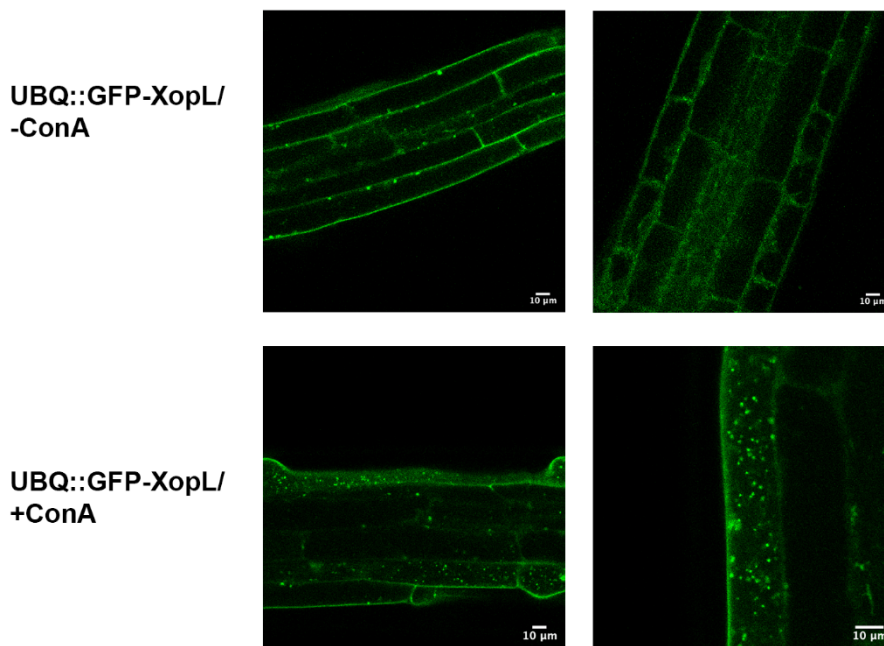

1827  
1828 **Fig. S12: XopL is degraded in the vacuole.** Localization of GFP-XopL in the presence or  
1829 absence of ConA in transgenic GFP-XopL. DMSO or 0.5  $\mu\text{M}$  ConA was used to treat seedlings,  
1830 followed by confocal imaging of the roots. GFP-labeled puncta detectable upon ConA treatment  
1831 indicate XopL accumulation in the vacuole (bars = 20  $\mu\text{m}$ ).

1832

## 1833 Supplemental Figure 13

1834

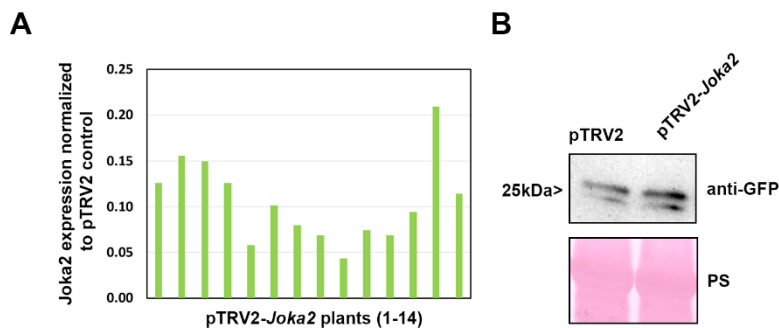

1835

1836

1837 **Fig. S13: Virus-induced gene silencing of *Joka2* in *N. benthamiana* plants.**

1838 (A) qRT-PCR analysis of *Joka2* mRNA levels in *Joka2* silenced pepper plants. *Actin* expression  
1839 was used to normalize the expression value in each sample, and relative expression values were  
1840 determined against pTRV2 control plants (set to 1).

1841 (B) Immunoblot analysis of GFP and GFP-XopL protein levels in *N. benthamiana* plants  
1842 silenced for *Joka2* (pTRV2-*Joka2*) compared against control (pTRV2). Ponceau staining (PS)  
1843 served as a loading control.

1844

#### 1845 Supplemental Figure 14

1846

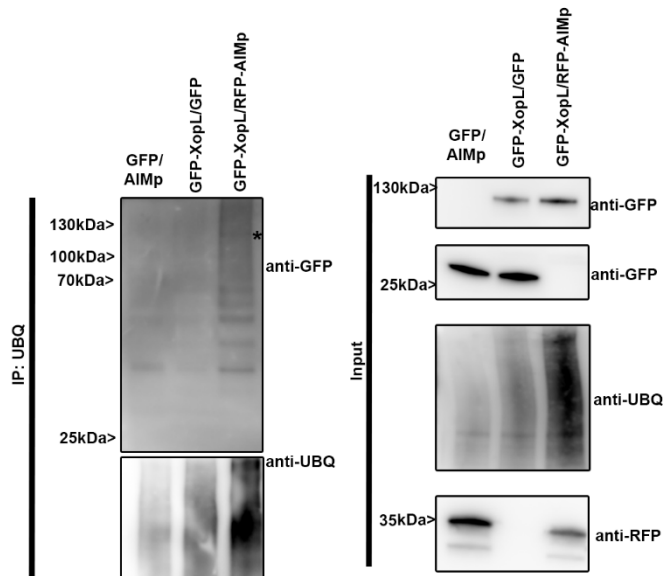

1847 **Fig. S14: XopL in planta ubiquitination is enhanced by the presence of AIMp** GFP-XopL  
1848 or GFP were transiently expressed in *N. benthamiana*. RFP-AIMp was co-infiltrated. Samples  
1849 were taken 48 hpi, and total proteins (Input) were subjected to immunoprecipitation (IP) with  
1850 the ubiquitin pan selector, followed by immunoblot analysis of the precipitates using either anti-  
1851 GFP or anti-ubiquitin antibodies. RFP-AIMp expression was verified by an anti-RFP antibody.  
1852 Asterisk indicates the GFP-XopL full-length protein. The experiment was repeated twice with  
1853 similar results.

1854

1855

#### 1856 Supplemental Figure 15

1857

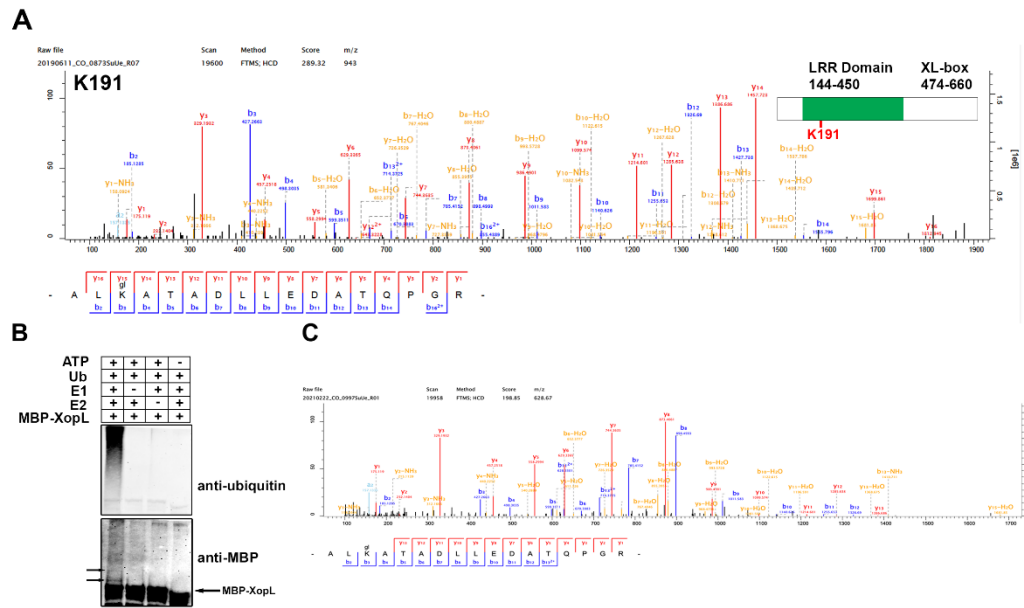

1858  
1859  
1860  
1861  
1862  
1863  
1864  
1865  
1866  
1867  
1868  
1869  
1870  
1871  
1872  
1873  
1874  
1875  
1876  
1877  
1878

**Fig. S15: XopL is ubiquitinated *in planta* and undergoes self-ubiquitination**

(A) XopL ubiquitination site at lysine 191 was identified *in vivo* by LC-MS/MS. GFP-XopL was transiently expressed in *N. benthamiana* and total proteins were subjected to anti-GFP IP followed by trypsin digestion. Ubiquitinated peptides were detected by LC-MS/MS. The spectrum shows the fragmentation pattern of the GlyGly modified peptide ALgIKATADLLEDATQPGR corresponding to amino acids 189-205.

(B) *In vitro* ubiquitination assay reveals autoubiquitination of XopL. Ubiquitination of MBP-XopL was tested using the Arabidopsis His-AtUBA1 and His-AtUBC8. Lanes 2 to 4 are negative controls. Proteins were separated by SDS-PAGE and detected by immunoblotting using the indicated antibodies. Arrows in the MBP blot indicate higher molecular weight bands of MBP-XopL and autoubiquitination events. The experiment was repeated twice with similar results.

(C) XopL ubiquitination site at lysine 191 was identified *in vitro* by LC-MS/MS. GST-XopL was used in an *in vitro* ubiquitination assay and samples were subjected to trypsin digestion. Ubiquitinated peptides were detected by LC-MS/MS. The spectrum shows the fragmentation pattern of the GlyGly modified peptide ALgIKATADLLEDATQPGR corresponding to amino acids 189-205.

**Supplemental Figure 16**



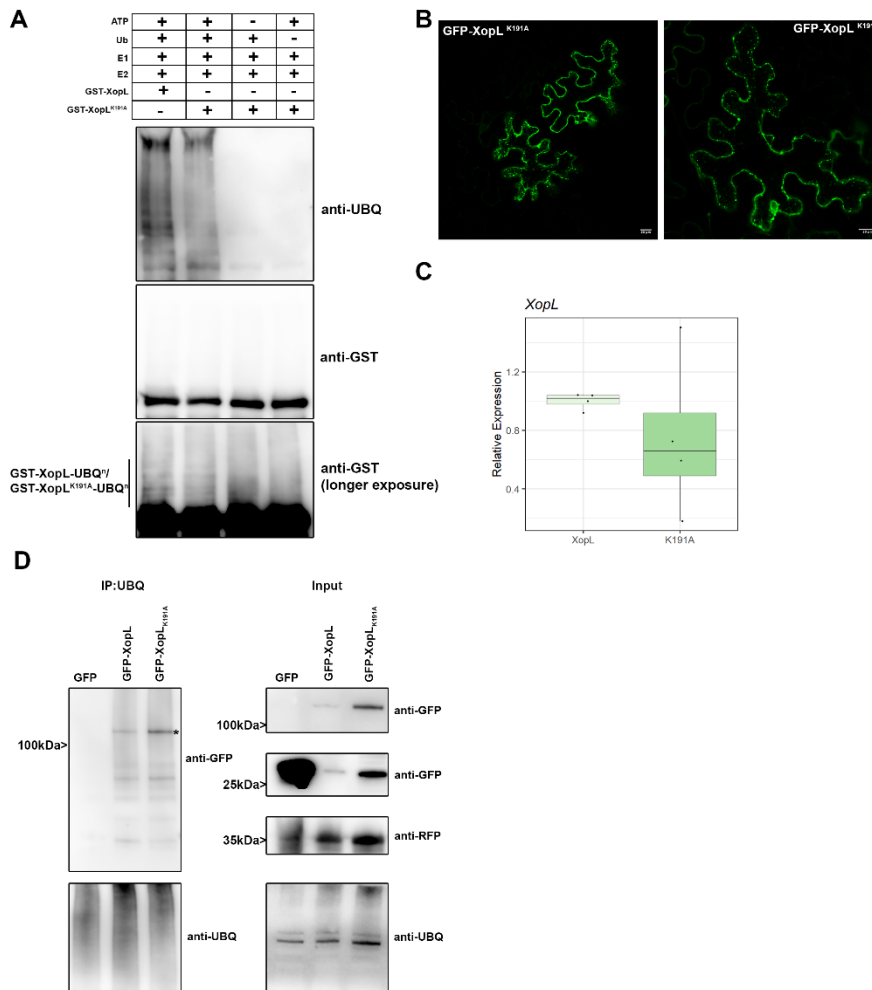

1879  
1880

1881

**Fig. S16: Characterization of XopL<sub>K191A</sub> variant in vitro and in planta.**

1882 **(A)** *In vitro* ubiquitination assay reveals less autoubiquitination of XopL K191A compared to  
1883 XopL WT. Ubiquitination of GST-XopL was tested using the Arabidopsis His-AtUBA1 and  
1884 His-AtUBC8. Lanes 3 to 5 are negative controls. Proteins were separated by SDS-PAGE and  
1885 detected by immunoblotting using the indicated antibodies. The experiment was repeated twice  
1886 with similar results.

1887 **(B)** Localization analysis of GFP-XopL<sub>K191A</sub> in *N. benthamiana* leaves. Imaging was performed  
1888 2 d after transient expression and images represent single confocal planes from abaxial  
1889 epidermal cells (bars = 20 μm).

1890 **(C)** qRT-PCR analysis of GFP-XopL and GFP-XopL K191A mRNA levels in *N. benthamiana*  
1891 plants during transient expression. *Actin* expression was used to normalize the expression value  
1892 in each sample.

1893 **(D)** GFP-XopL and GFP-XopL<sub>K191A</sub> were transiently expressed in *N. benthamiana*. RFP-AIMp  
1894 was co-infiltrated. Samples were taken 48 hpi, and total proteins (Input) were subjected to  
1895 immunoprecipitation (IP) with the ubiquitin pan selector, followed by immunoblot analysis of  
1896 the precipitates using either anti-GFP or anti-ubiquitin antibodies. GFP served as a control.  
1897 RFP-AIMp expression was verified by an anti-RFP antibody. Asterisk indicates the GFP-XopL  
1898 full-length protein. The experiment was repeated twice with similar results.

1899

1900 **Supplemental Figure 17**

1901
